# Supplementary material for: Chromosome-level haplotype-resolved assembly of highly heterozygous grass genomes with PhaseGrass
Source: Research Square preprint supplement (doi:10.21203/rs.3.rs-6923639/v1), 2025-07-14
Supplement: Supplementary file 2 [file 807952e0c3f356e741ab66e5.xlsx]

## Sheet: Supplementary Table 1
Sequencing data statistics
Sample	Sequencing data	Coverage per haplotype	Read length	Mean accuracy (QV)
DH647	WGS short reads	26 ×	2 × 150 bp	35
DH647	WGS ONT reads	31 ×	30 kb (N50)	11
DH647	Hi-C reads	25 ×	2 × 110 bp	35
Sikem	WGS short reads	26 ×	2 × 150 bp	35
Sikem	WGS ONT reads	41 ×	46 kb (N50)	10
Sikem	WGS PacBio HiFi reads	20 ×	16 kb (N50)	33
Sikem	Hi-C reads	25 ×	2 × 110 bp	35

## Sheet: Supplementary Table 2
DH647 phased SNPs with PhaseGrass
Sample	Chromosome (Chr)	Number of blocks	Heterozygous SNPs	Phased SNPs	Fraction of phased SNPs	Fraction of phased SNPs in the largest block	Phase block N50
DH647	Chr1	3	406683	405858	0.997971	0.999623	252115434
DH647	Chr2	2	1114329	1112094	0.997994	0.999986	328061788
DH647	Chr3	1	1161192	1159099	0.998198	1	353996801
DH647	Chr4	1	786817	785377	0.99817	1	406061665
DH647	Chr5	5	858763	857434	0.998452	0.999959	165167366
DH647	Chr6	1	864878	862985	0.997811	1	274008430
DH647	Chr7	2	1051570	1049197	0.997743	0.999998	321979893
DH647	ALL	15	6244232	6232044	0.998048	0.999967	321979893

## Sheet: Supplementary Table 3
DH647 phase block information
Sample	Chromosome (Chr)	Phase block	Start	End	SNPs (#)	Block length (bp)
DH647	Chr4	Chromosome-level	5464	406067129	785377	406061665
DH647	Chr3	Chromosome-level	28	353996829	1159099	353996801
DH647	Chr7	Chromosome-level	50	334192480	1049195	334192430
DH647	Chr2	Chromosome-level	12341	333278978	1112078	333266637
DH647	Chr6	Chromosome-level	1290	274009720	862985	274008430
DH647	Chr1	Chromosome-level	421	271784613	405705	271784192
DH647	Chr5	Chromosome-level	34675	267971454	857399	267936779
DH647	Chr2	Small	4945310	5074387	16	129077
DH647	Chr1	Small	14376408	14499098	151	122690
DH647	Chr5	Small	97439316	97558906	20	119590
DH647	Chr7	Small	322052712	322107899	2	55187
DH647	Chr5	Small	102633364	102664668	8	31304
DH647	Chr5	Small	86947648	86965891	2	18243
DH647	Chr1	Small	19554833	19570860	2	16027
DH647	Chr5	Small	102722810	102734676	5	11866

## Sheet: Supplementary Table 4
Sikem phased SNPs with PhaseGrass using different combinations of phasing data
Sample	Phasing data combination	Chromosome (Chr)	Number of blocks	Heterozygous SNPs	Phased SNPs	Fraction of phased SNPs	Fraction of phased SNPs in the largest block	Phase block N50
Sikem	PacBio HiFi + Hi-C	Chr1	301	810188	809804	0.999526	0.996775	2077164
Sikem	PacBio HiFi + Hi-C	Chr2	294	1040644	1040277	0.999647	0.99777	2506660
Sikem	PacBio HiFi + Hi-C	Chr3	469	1113894	1113292	0.99946	0.995997	1784116
Sikem	PacBio HiFi + Hi-C	Chr4	433	1267363	1266626	0.999418	0.997374	1861339
Sikem	PacBio HiFi + Hi-C	Chr5	377	663288	663006	0.999575	0.994413	1426537
Sikem	PacBio HiFi + Hi-C	Chr6	274	816528	816204	0.999603	0.99743	1736030
Sikem	PacBio HiFi + Hi-C	Chr7	422	1028587	1028063	0.999491	0.996586	1749442
Sikem	PacBio HiFi + Hi-C	ALL	2570	6740492	6737272	0.999522	0.996731	1851222
Sikem	ONT + Hi-C	Chr1	5	810169	809042	0.998609	0.999964	103853777
Sikem	ONT + Hi-C	Chr2	3	1040635	1039444	0.998856	0.999994	192822645
Sikem	ONT + Hi-C	Chr3	20	1113926	1112365	0.998599	0.999658	98895866
Sikem	ONT + Hi-C	Chr4	2	1267361	1265529	0.998554	0.999996	297711388
Sikem	ONT + Hi-C	Chr5	8	663307	662540	0.998844	0.999866	96592919
Sikem	ONT + Hi-C	Chr6	4	816583	815616	0.998816	0.999901	85147584
Sikem	ONT + Hi-C	Chr7	11	1028585	1027004	0.998463	0.999864	59802266
Sikem	ONT + Hi-C	ALL	53	6740566	6731540	0.998661	0.999892	103853777

## Sheet: Supplementary Table 5
Sikem phase block information
Sample	Phasing data combination	Chromosome (Chr)	Phase block	Start	End	SNPs (#)	Block length (bp)
Sikem	PacBio HiFi + Hi-C	Chr4	Chromosome-level	798	427801028	1263300	427800230
Sikem	PacBio HiFi + Hi-C	Chr3	Chromosome-level	2119162	390243253	1108836	388124091
Sikem	PacBio HiFi + Hi-C	Chr7	Chromosome-level	21182	364880171	1024553	364858989
Sikem	PacBio HiFi + Hi-C	Chr2	Chromosome-level	597	311584369	1037957	311583772
Sikem	PacBio HiFi + Hi-C	Chr1	Chromosome-level	145600	273125834	807192	272980234
Sikem	PacBio HiFi + Hi-C	Chr5	Chromosome-level	19247	257459018	659302	257439771
Sikem	PacBio HiFi + Hi-C	Chr6	Chromosome-level	122	254597595	814106	254597473
Sikem	PacBio HiFi + Hi-C	Chr4	Small	3259988	3435864	72	175876
Sikem	PacBio HiFi + Hi-C	Chr5	Small	92607418	92776259	54	168841
Sikem	PacBio HiFi + Hi-C	Chr2	Small	164665123	164833441	63	168318
Sikem	PacBio HiFi + Hi-C	Chr5	Small	90018606	90174228	49	155622
Sikem	PacBio HiFi + Hi-C	Chr7	Small	168775060	168928734	64	153674
Sikem	PacBio HiFi + Hi-C	Chr6	Small	109091320	109242444	44	151124
Sikem	PacBio HiFi + Hi-C	Chr2	Small	164958132	165091105	51	132973
Sikem	PacBio HiFi + Hi-C	Chr2	Small	164506805	164638746	47	131941
Sikem	PacBio HiFi + Hi-C	Chr6	Small	99875450	100006035	41	130585
Sikem	PacBio HiFi + Hi-C	Chr5	Small	86207694	86337554	101	129860
Sikem	PacBio HiFi + Hi-C	Chr7	Small	160413367	160543057	62	129690
Sikem	PacBio HiFi + Hi-C	Chr5	Small	90197767	90326880	29	129113
Sikem	PacBio HiFi + Hi-C	Chr1	Small	105193175	105316754	27	123579
Sikem	PacBio HiFi + Hi-C	Chr3	Small	145834327	145954989	23	120662
Sikem	PacBio HiFi + Hi-C	Chr1	Small	106615157	106729773	22	114616
Sikem	PacBio HiFi + Hi-C	Chr6	Small	108196518	108310712	22	114194
Sikem	PacBio HiFi + Hi-C	Chr3	Small	245671394	245779604	30	108210
Sikem	PacBio HiFi + Hi-C	Chr3	Small	145975407	146082647	20	107240
Sikem	PacBio HiFi + Hi-C	Chr3	Small	191482792	191586463	67	103671
Sikem	PacBio HiFi + Hi-C	Chr5	Small	97396461	97497831	24	101370
Sikem	PacBio HiFi + Hi-C	Chr7	Small	246024715	246125649	48	100934
Sikem	PacBio HiFi + Hi-C	Chr2	Small	166006483	166103880	11	97397
Sikem	PacBio HiFi + Hi-C	Chr1	Small	151804656	151899899	17	95243
Sikem	PacBio HiFi + Hi-C	Chr7	Small	163030060	163124947	33	94887
Sikem	PacBio HiFi + Hi-C	Chr5	Small	92861324	92954656	54	93332
Sikem	PacBio HiFi + Hi-C	Chr7	Small	179044574	179136096	11	91522
Sikem	PacBio HiFi + Hi-C	Chr5	Small	92461261	92551674	16	90413
Sikem	PacBio HiFi + Hi-C	Chr4	Small	341991794	342078213	31	86419
Sikem	PacBio HiFi + Hi-C	Chr6	Small	108437076	108521468	22	84392
Sikem	PacBio HiFi + Hi-C	Chr5	Small	96316814	96400845	15	84031
Sikem	PacBio HiFi + Hi-C	Chr2	Small	142298611	142381251	22	82640
Sikem	PacBio HiFi + Hi-C	Chr3	Small	147617558	147700131	15	82573
Sikem	PacBio HiFi + Hi-C	Chr6	Small	108979160	109059644	12	80484
Sikem	PacBio HiFi + Hi-C	Chr5	Small	89910188	89990150	62	79962
Sikem	PacBio HiFi + Hi-C	Chr3	Small	134874891	134954175	39	79284
Sikem	PacBio HiFi + Hi-C	Chr2	Small	10319960	10398877	18	78917
Sikem	PacBio HiFi + Hi-C	Chr3	Small	269944394	270022837	46	78443
Sikem	PacBio HiFi + Hi-C	Chr3	Small	196006647	196084865	59	78218
Sikem	PacBio HiFi + Hi-C	Chr6	Small	107845825	107923896	11	78071
Sikem	PacBio HiFi + Hi-C	Chr6	Small	107195811	107271812	14	76001
Sikem	PacBio HiFi + Hi-C	Chr5	Small	87669107	87740770	29	71663
Sikem	PacBio HiFi + Hi-C	Chr3	Small	254067541	254137379	14	69838
Sikem	PacBio HiFi + Hi-C	Chr2	Small	165899298	165969065	7	69767
Sikem	PacBio HiFi + Hi-C	Chr2	Small	86185264	86255030	25	69766
Sikem	PacBio HiFi + Hi-C	Chr3	Small	4831437	4900788	78	69351
Sikem	PacBio HiFi + Hi-C	Chr6	Small	112196740	112265935	7	69195
Sikem	PacBio HiFi + Hi-C	Chr5	Small	94093718	94162620	25	68902
Sikem	PacBio HiFi + Hi-C	Chr1	Small	7145823	7214239	17	68416
Sikem	PacBio HiFi + Hi-C	Chr5	Small	96113677	96180927	9	67250
Sikem	PacBio HiFi + Hi-C	Chr4	Small	414071456	414138297	29	66841
Sikem	PacBio HiFi + Hi-C	Chr4	Small	269901905	269967131	13	65226
Sikem	PacBio HiFi + Hi-C	Chr7	Small	176192848	176257635	9	64787
Sikem	PacBio HiFi + Hi-C	Chr3	Small	125592837	125657346	21	64509
Sikem	PacBio HiFi + Hi-C	Chr1	Small	105648582	105712710	8	64128
Sikem	PacBio HiFi + Hi-C	Chr2	Small	233227606	233291078	33	63472
Sikem	PacBio HiFi + Hi-C	Chr1	Small	272777161	272840134	49	62973
Sikem	PacBio HiFi + Hi-C	Chr4	Small	416338662	416401078	33	62416
Sikem	PacBio HiFi + Hi-C	Chr3	Small	42517390	42579630	60	62240
Sikem	PacBio HiFi + Hi-C	Chr1	Small	95664118	95726328	45	62210
Sikem	PacBio HiFi + Hi-C	Chr2	Small	164873820	164934335	27	60515
Sikem	PacBio HiFi + Hi-C	Chr7	Small	68030064	68090157	11	60093
Sikem	PacBio HiFi + Hi-C	Chr3	Small	149409614	149469123	35	59509
Sikem	PacBio HiFi + Hi-C	Chr3	Small	51358550	51417782	31	59232
Sikem	PacBio HiFi + Hi-C	Chr2	Small	165709730	165768930	9	59200
Sikem	PacBio HiFi + Hi-C	Chr4	Small	380033161	380092196	21	59035
Sikem	PacBio HiFi + Hi-C	Chr5	Small	85456775	85515163	23	58388
Sikem	PacBio HiFi + Hi-C	Chr1	Small	102928506	102986802	6	58296
Sikem	PacBio HiFi + Hi-C	Chr3	Small	144208762	144266626	7	57864
Sikem	PacBio HiFi + Hi-C	Chr7	Small	17288509	17345790	18	57281
Sikem	PacBio HiFi + Hi-C	Chr1	Small	102414294	102471521	13	57227
Sikem	PacBio HiFi + Hi-C	Chr2	Small	100127057	100184199	17	57142
Sikem	PacBio HiFi + Hi-C	Chr1	Small	64965210	65021948	6	56738
Sikem	PacBio HiFi + Hi-C	Chr5	Small	86627711	86684151	13	56440
Sikem	PacBio HiFi + Hi-C	Chr1	Small	261274149	261330581	18	56432
Sikem	PacBio HiFi + Hi-C	Chr5	Small	84384112	84439650	26	55538
Sikem	PacBio HiFi + Hi-C	Chr1	Small	9762113	9817543	12	55430
Sikem	PacBio HiFi + Hi-C	Chr3	Small	388822479	388877781	47	55302
Sikem	PacBio HiFi + Hi-C	Chr3	Small	145376699	145431937	7	55238
Sikem	PacBio HiFi + Hi-C	Chr1	Small	78405028	78459918	27	54890
Sikem	PacBio HiFi + Hi-C	Chr5	Small	203256594	203310786	35	54192
Sikem	PacBio HiFi + Hi-C	Chr5	Small	185835803	185889672	55	53869
Sikem	PacBio HiFi + Hi-C	Chr1	Small	45857458	45909790	44	52332
Sikem	PacBio HiFi + Hi-C	Chr5	Small	96973787	97026087	6	52300
Sikem	PacBio HiFi + Hi-C	Chr7	Small	171397102	171449358	51	52256
Sikem	PacBio HiFi + Hi-C	Chr5	Small	100822500	100874543	19	52043
Sikem	PacBio HiFi + Hi-C	Chr5	Small	9578383	9630268	27	51885
Sikem	PacBio HiFi + Hi-C	Chr6	Small	236538049	236589772	13	51723
Sikem	PacBio HiFi + Hi-C	Chr6	Small	32336170	32387780	20	51610
Sikem	PacBio HiFi + Hi-C	Chr7	Small	153189010	153240575	6	51565
Sikem	PacBio HiFi + Hi-C	Chr1	Small	222577025	222628283	21	51258
Sikem	PacBio HiFi + Hi-C	Chr3	Small	298756542	298807694	64	51152
Sikem	PacBio HiFi + Hi-C	Chr5	Small	208221905	208273056	19	51151
Sikem	PacBio HiFi + Hi-C	Chr5	Small	83146248	83197227	13	50979
Sikem	PacBio HiFi + Hi-C	Chr5	Small	87357828	87408753	35	50925
Sikem	PacBio HiFi + Hi-C	Chr5	Small	232211613	232262097	26	50484
Sikem	PacBio HiFi + Hi-C	Chr6	Small	107771384	107821470	6	50086
Sikem	PacBio HiFi + Hi-C	Chr7	Small	112611572	112661614	32	50042
Sikem	PacBio HiFi + Hi-C	Chr7	Small	311149742	311199732	17	49990
Sikem	PacBio HiFi + Hi-C	Chr2	Small	9432655	9482424	22	49769
Sikem	PacBio HiFi + Hi-C	Chr3	Small	42710262	42759908	20	49646
Sikem	PacBio HiFi + Hi-C	Chr4	Small	203781417	203830978	27	49561
Sikem	PacBio HiFi + Hi-C	Chr2	Small	68838165	68887605	11	49440
Sikem	PacBio HiFi + Hi-C	Chr3	Small	286092463	286141774	11	49311
Sikem	PacBio HiFi + Hi-C	Chr4	Small	122868467	122917726	14	49259
Sikem	PacBio HiFi + Hi-C	Chr5	Small	71088523	71137735	36	49212
Sikem	PacBio HiFi + Hi-C	Chr3	Small	146390357	146439428	8	49071
Sikem	PacBio HiFi + Hi-C	Chr7	Small	244939220	244987634	22	48414
Sikem	PacBio HiFi + Hi-C	Chr6	Small	136052515	136100928	15	48413
Sikem	PacBio HiFi + Hi-C	Chr1	Small	105025482	105073885	12	48403
Sikem	PacBio HiFi + Hi-C	Chr3	Small	191833226	191881588	11	48362
Sikem	PacBio HiFi + Hi-C	Chr4	Small	241650960	241699206	27	48246
Sikem	PacBio HiFi + Hi-C	Chr5	Small	1291469	1339576	11	48107
Sikem	PacBio HiFi + Hi-C	Chr6	Small	100385894	100433845	5	47951
Sikem	PacBio HiFi + Hi-C	Chr7	Small	41636376	41683880	15	47504
Sikem	PacBio HiFi + Hi-C	Chr3	Small	238572077	238619499	12	47422
Sikem	PacBio HiFi + Hi-C	Chr7	Small	316349198	316396481	19	47283
Sikem	PacBio HiFi + Hi-C	Chr5	Small	151649198	151696427	15	47229
Sikem	PacBio HiFi + Hi-C	Chr6	Small	228688143	228735351	42	47208
Sikem	PacBio HiFi + Hi-C	Chr4	Small	30449896	30497030	23	47134
Sikem	PacBio HiFi + Hi-C	Chr3	Small	31238214	31285327	14	47113
Sikem	PacBio HiFi + Hi-C	Chr3	Small	145758766	145805863	4	47097
Sikem	PacBio HiFi + Hi-C	Chr3	Small	167814347	167861442	50	47095
Sikem	PacBio HiFi + Hi-C	Chr5	Small	89311801	89358852	20	47051
Sikem	PacBio HiFi + Hi-C	Chr1	Small	155352955	155399594	38	46639
Sikem	PacBio HiFi + Hi-C	Chr5	Small	89399083	89445496	23	46413
Sikem	PacBio HiFi + Hi-C	Chr6	Small	111063954	111110338	21	46384
Sikem	PacBio HiFi + Hi-C	Chr2	Small	74477401	74523533	31	46132
Sikem	PacBio HiFi + Hi-C	Chr3	Small	192725564	192771651	28	46087
Sikem	PacBio HiFi + Hi-C	Chr5	Small	1383019	1428831	32	45812
Sikem	PacBio HiFi + Hi-C	Chr1	Small	7287768	7333447	4	45679
Sikem	PacBio HiFi + Hi-C	Chr2	Small	217826523	217872197	9	45674
Sikem	PacBio HiFi + Hi-C	Chr7	Small	40764927	40810440	14	45513
Sikem	PacBio HiFi + Hi-C	Chr7	Small	337841555	337887068	7	45513
Sikem	PacBio HiFi + Hi-C	Chr5	Small	6349493	6394998	26	45505
Sikem	PacBio HiFi + Hi-C	Chr6	Small	71280592	71325916	16	45324
Sikem	PacBio HiFi + Hi-C	Chr7	Small	208184729	208229411	6	44682
Sikem	PacBio HiFi + Hi-C	Chr7	Small	19809390	19853911	17	44521
Sikem	PacBio HiFi + Hi-C	Chr1	Small	166288194	166332707	18	44513
Sikem	PacBio HiFi + Hi-C	Chr7	Small	3032224	3076475	14	44251
Sikem	PacBio HiFi + Hi-C	Chr6	Small	19118256	19162327	25	44071
Sikem	PacBio HiFi + Hi-C	Chr2	Small	181861091	181905063	16	43972
Sikem	PacBio HiFi + Hi-C	Chr4	Small	3475467	3519420	21	43953
Sikem	PacBio HiFi + Hi-C	Chr3	Small	146603367	146646600	4	43233
Sikem	PacBio HiFi + Hi-C	Chr7	Small	364488515	364531662	40	43147
Sikem	PacBio HiFi + Hi-C	Chr2	Small	143181447	143224590	10	43143
Sikem	PacBio HiFi + Hi-C	Chr2	Small	277274803	277317730	24	42927
Sikem	PacBio HiFi + Hi-C	Chr4	Small	132223470	132266319	26	42849
Sikem	PacBio HiFi + Hi-C	Chr1	Small	64373551	64416274	29	42723
Sikem	PacBio HiFi + Hi-C	Chr3	Small	281328186	281370901	16	42715
Sikem	PacBio HiFi + Hi-C	Chr7	Small	215853475	215896113	10	42638
Sikem	PacBio HiFi + Hi-C	Chr1	Small	178166473	178208985	14	42512
Sikem	PacBio HiFi + Hi-C	Chr2	Small	307686781	307729272	23	42491
Sikem	PacBio HiFi + Hi-C	Chr1	Small	200352678	200395160	21	42482
Sikem	PacBio HiFi + Hi-C	Chr4	Small	364604821	364647252	10	42431
Sikem	PacBio HiFi + Hi-C	Chr4	Small	204507404	204549831	8	42427
Sikem	PacBio HiFi + Hi-C	Chr5	Small	128788816	128830868	16	42052
Sikem	PacBio HiFi + Hi-C	Chr1	Small	140948469	140990511	16	42042
Sikem	PacBio HiFi + Hi-C	Chr2	Small	50397818	50439734	29	41916
Sikem	PacBio HiFi + Hi-C	Chr3	Small	40613902	40655636	11	41734
Sikem	PacBio HiFi + Hi-C	Chr7	Small	300972697	301014209	20	41512
Sikem	PacBio HiFi + Hi-C	Chr5	Small	54052686	54094133	36	41447
Sikem	PacBio HiFi + Hi-C	Chr7	Small	270968507	271009640	27	41133
Sikem	PacBio HiFi + Hi-C	Chr3	Small	144449716	144490839	11	41123
Sikem	PacBio HiFi + Hi-C	Chr2	Small	193483684	193524744	13	41060
Sikem	PacBio HiFi + Hi-C	Chr7	Small	8431915	8472951	22	41036
Sikem	PacBio HiFi + Hi-C	Chr5	Small	201872432	201913196	11	40764
Sikem	PacBio HiFi + Hi-C	Chr3	Small	110459578	110500256	22	40678
Sikem	PacBio HiFi + Hi-C	Chr1	Small	43736658	43777178	7	40520
Sikem	PacBio HiFi + Hi-C	Chr1	Small	99984203	100024715	13	40512
Sikem	PacBio HiFi + Hi-C	Chr5	Small	95892088	95932559	5	40471
Sikem	PacBio HiFi + Hi-C	Chr7	Small	175617066	175657402	12	40336
Sikem	PacBio HiFi + Hi-C	Chr3	Small	144048727	144088919	8	40192
Sikem	PacBio HiFi + Hi-C	Chr3	Small	29961735	30001863	16	40128
Sikem	PacBio HiFi + Hi-C	Chr7	Small	27510786	27550893	33	40107
Sikem	PacBio HiFi + Hi-C	Chr4	Small	26521895	26561907	13	40012
Sikem	PacBio HiFi + Hi-C	Chr1	Small	42535859	42575814	16	39955
Sikem	PacBio HiFi + Hi-C	Chr1	Small	164070230	164110108	11	39878
Sikem	PacBio HiFi + Hi-C	Chr2	Small	123069754	123109612	5	39858
Sikem	PacBio HiFi + Hi-C	Chr4	Small	185162343	185202195	31	39852
Sikem	PacBio HiFi + Hi-C	Chr3	Small	144517330	144557123	5	39793
Sikem	PacBio HiFi + Hi-C	Chr3	Small	42367430	42407004	47	39574
Sikem	PacBio HiFi + Hi-C	Chr5	Small	58548201	58587697	9	39496
Sikem	PacBio HiFi + Hi-C	Chr6	Small	150725739	150765218	44	39479
Sikem	PacBio HiFi + Hi-C	Chr1	Small	115098790	115138253	132	39463
Sikem	PacBio HiFi + Hi-C	Chr4	Small	186354918	186394223	26	39305
Sikem	PacBio HiFi + Hi-C	Chr6	Small	127579931	127619212	8	39281
Sikem	PacBio HiFi + Hi-C	Chr2	Small	214066752	214105981	12	39229
Sikem	PacBio HiFi + Hi-C	Chr2	Small	73235002	73274197	22	39195
Sikem	PacBio HiFi + Hi-C	Chr4	Small	178813059	178852254	23	39195
Sikem	PacBio HiFi + Hi-C	Chr6	Small	93434194	93473249	12	39055
Sikem	PacBio HiFi + Hi-C	Chr3	Small	339082619	339121635	26	39016
Sikem	PacBio HiFi + Hi-C	Chr3	Small	83813967	83852974	17	39007
Sikem	PacBio HiFi + Hi-C	Chr2	Small	199122569	199161534	14	38965
Sikem	PacBio HiFi + Hi-C	Chr5	Small	88562125	88600933	19	38808
Sikem	PacBio HiFi + Hi-C	Chr5	Small	76893499	76932300	13	38801
Sikem	PacBio HiFi + Hi-C	Chr3	Small	313383417	313422119	7	38702
Sikem	PacBio HiFi + Hi-C	Chr3	Small	323707170	323745707	25	38537
Sikem	PacBio HiFi + Hi-C	Chr7	Small	175559916	175598392	8	38476
Sikem	PacBio HiFi + Hi-C	Chr2	Small	10828705	10867155	9	38450
Sikem	PacBio HiFi + Hi-C	Chr5	Small	7189406	7227821	28	38415
Sikem	PacBio HiFi + Hi-C	Chr7	Small	275319573	275357956	9	38383
Sikem	PacBio HiFi + Hi-C	Chr5	Small	46022165	46060513	69	38348
Sikem	PacBio HiFi + Hi-C	Chr7	Small	269753132	269791407	15	38275
Sikem	PacBio HiFi + Hi-C	Chr3	Small	145627090	145665293	5	38203
Sikem	PacBio HiFi + Hi-C	Chr5	Small	95966452	96004520	9	38068
Sikem	PacBio HiFi + Hi-C	Chr3	Small	155613482	155651533	10	38051
Sikem	PacBio HiFi + Hi-C	Chr1	Small	59393012	59430982	72	37970
Sikem	PacBio HiFi + Hi-C	Chr5	Small	151135747	151173625	24	37878
Sikem	PacBio HiFi + Hi-C	Chr5	Small	247586823	247624556	25	37733
Sikem	PacBio HiFi + Hi-C	Chr7	Small	337909819	337947537	5	37718
Sikem	PacBio HiFi + Hi-C	Chr6	Small	93256904	93294387	9	37483
Sikem	PacBio HiFi + Hi-C	Chr3	Small	3339106	3376571	34	37465
Sikem	PacBio HiFi + Hi-C	Chr7	Small	145523520	145560926	8	37406
Sikem	PacBio HiFi + Hi-C	Chr1	Small	232383690	232421086	16	37396
Sikem	PacBio HiFi + Hi-C	Chr1	Small	102733561	102770905	7	37344
Sikem	PacBio HiFi + Hi-C	Chr5	Small	89792199	89829373	16	37174
Sikem	PacBio HiFi + Hi-C	Chr3	Small	26824279	26861451	7	37172
Sikem	PacBio HiFi + Hi-C	Chr5	Small	166395715	166432756	16	37041
Sikem	PacBio HiFi + Hi-C	Chr3	Small	387901792	387938820	17	37028
Sikem	PacBio HiFi + Hi-C	Chr4	Small	171120239	171157234	16	36995
Sikem	PacBio HiFi + Hi-C	Chr7	Small	145924527	145961404	33	36877
Sikem	PacBio HiFi + Hi-C	Chr2	Small	228306688	228343548	9	36860
Sikem	PacBio HiFi + Hi-C	Chr6	Small	205949811	205986671	8	36860
Sikem	PacBio HiFi + Hi-C	Chr3	Small	169466417	169503262	13	36845
Sikem	PacBio HiFi + Hi-C	Chr3	Small	193635191	193671919	20	36728
Sikem	PacBio HiFi + Hi-C	Chr2	Small	15278171	15314890	17	36719
Sikem	PacBio HiFi + Hi-C	Chr3	Small	1659762	1696435	18	36673
Sikem	PacBio HiFi + Hi-C	Chr6	Small	116650745	116687329	8	36584
Sikem	PacBio HiFi + Hi-C	Chr1	Small	1083885	1120467	8	36582
Sikem	PacBio HiFi + Hi-C	Chr5	Small	192088027	192124501	18	36474
Sikem	PacBio HiFi + Hi-C	Chr7	Small	122663677	122700077	10	36400
Sikem	PacBio HiFi + Hi-C	Chr3	Small	321804467	321840777	7	36310
Sikem	PacBio HiFi + Hi-C	Chr5	Small	88045327	88081626	8	36299
Sikem	PacBio HiFi + Hi-C	Chr1	Small	71281348	71317617	9	36269
Sikem	PacBio HiFi + Hi-C	Chr1	Small	75881326	75917594	17	36268
Sikem	PacBio HiFi + Hi-C	Chr1	Small	7006457	7042654	8	36197
Sikem	PacBio HiFi + Hi-C	Chr5	Small	209079884	209116044	14	36160
Sikem	PacBio HiFi + Hi-C	Chr5	Small	121601631	121637558	11	35927
Sikem	PacBio HiFi + Hi-C	Chr3	Small	321864354	321900244	27	35890
Sikem	PacBio HiFi + Hi-C	Chr4	Small	314248089	314283949	17	35860
Sikem	PacBio HiFi + Hi-C	Chr4	Small	253806840	253842571	6	35731
Sikem	PacBio HiFi + Hi-C	Chr7	Small	345523535	345559223	13	35688
Sikem	PacBio HiFi + Hi-C	Chr2	Small	54921878	54957534	9	35656
Sikem	PacBio HiFi + Hi-C	Chr4	Small	13367916	13403443	11	35527
Sikem	PacBio HiFi + Hi-C	Chr2	Small	165832523	165867994	5	35471
Sikem	PacBio HiFi + Hi-C	Chr7	Small	58787845	58823271	14	35426
Sikem	PacBio HiFi + Hi-C	Chr5	Small	87607453	87642850	16	35397
Sikem	PacBio HiFi + Hi-C	Chr5	Small	104811835	104847166	9	35331
Sikem	PacBio HiFi + Hi-C	Chr5	Small	162953731	162988975	6	35244
Sikem	PacBio HiFi + Hi-C	Chr3	Small	127521579	127556642	4	35063
Sikem	PacBio HiFi + Hi-C	Chr5	Small	198919580	198954609	19	35029
Sikem	PacBio HiFi + Hi-C	Chr4	Small	365780471	365815467	7	34996
Sikem	PacBio HiFi + Hi-C	Chr2	Small	273312549	273347192	20	34643
Sikem	PacBio HiFi + Hi-C	Chr4	Small	356472030	356506532	10	34502
Sikem	PacBio HiFi + Hi-C	Chr5	Small	91462787	91497260	25	34473
Sikem	PacBio HiFi + Hi-C	Chr5	Small	94034634	94069086	5	34452
Sikem	PacBio HiFi + Hi-C	Chr5	Small	192206885	192241263	11	34378
Sikem	PacBio HiFi + Hi-C	Chr7	Small	116975324	117009674	9	34350
Sikem	PacBio HiFi + Hi-C	Chr5	Small	89103218	89137441	10	34223
Sikem	PacBio HiFi + Hi-C	Chr7	Small	260225760	260259794	16	34034
Sikem	PacBio HiFi + Hi-C	Chr6	Small	145215975	145249984	6	34009
Sikem	PacBio HiFi + Hi-C	Chr3	Small	13982773	14016723	27	33950
Sikem	PacBio HiFi + Hi-C	Chr2	Small	89146160	89179964	9	33804
Sikem	PacBio HiFi + Hi-C	Chr2	Small	71891128	71924776	13	33648
Sikem	PacBio HiFi + Hi-C	Chr4	Small	237432974	237466571	9	33597
Sikem	PacBio HiFi + Hi-C	Chr4	Small	202775224	202808800	6	33576
Sikem	PacBio HiFi + Hi-C	Chr1	Small	219815185	219848732	37	33547
Sikem	PacBio HiFi + Hi-C	Chr7	Small	278078650	278112070	22	33420
Sikem	PacBio HiFi + Hi-C	Chr5	Small	1048820	1082057	38	33237
Sikem	PacBio HiFi + Hi-C	Chr5	Small	88160173	88193364	11	33191
Sikem	PacBio HiFi + Hi-C	Chr1	Small	48337001	48370190	43	33189
Sikem	PacBio HiFi + Hi-C	Chr6	Small	146021775	146054778	44	33003
Sikem	PacBio HiFi + Hi-C	Chr7	Small	194946786	194979705	19	32919
Sikem	PacBio HiFi + Hi-C	Chr4	Small	173816900	173849817	10	32917
Sikem	PacBio HiFi + Hi-C	Chr7	Small	150811175	150844091	42	32916
Sikem	PacBio HiFi + Hi-C	Chr1	Small	216732162	216765047	42	32885
Sikem	PacBio HiFi + Hi-C	Chr5	Small	92292575	92325407	14	32832
Sikem	PacBio HiFi + Hi-C	Chr4	Small	426352023	426384772	22	32749
Sikem	PacBio HiFi + Hi-C	Chr7	Small	264369965	264402524	8	32559
Sikem	PacBio HiFi + Hi-C	Chr3	Small	271398548	271431091	4	32543
Sikem	PacBio HiFi + Hi-C	Chr3	Small	212847944	212880126	20	32182
Sikem	PacBio HiFi + Hi-C	Chr5	Small	94224505	94256682	11	32177
Sikem	PacBio HiFi + Hi-C	Chr2	Small	226915168	226947211	9	32043
Sikem	PacBio HiFi + Hi-C	Chr3	Small	145509209	145541245	5	32036
Sikem	PacBio HiFi + Hi-C	Chr4	Small	236096499	236128535	11	32036
Sikem	PacBio HiFi + Hi-C	Chr3	Small	143636684	143668704	17	32020
Sikem	PacBio HiFi + Hi-C	Chr1	Small	116404167	116436133	13	31966
Sikem	PacBio HiFi + Hi-C	Chr4	Small	421161503	421193442	7	31939
Sikem	PacBio HiFi + Hi-C	Chr2	Small	206981800	207013678	14	31878
Sikem	PacBio HiFi + Hi-C	Chr3	Small	125536627	125568488	7	31861
Sikem	PacBio HiFi + Hi-C	Chr5	Small	77279195	77311013	4	31818
Sikem	PacBio HiFi + Hi-C	Chr4	Small	171747163	171778955	12	31792
Sikem	PacBio HiFi + Hi-C	Chr5	Small	69358989	69390686	10	31697
Sikem	PacBio HiFi + Hi-C	Chr3	Small	318057704	318089259	5	31555
Sikem	PacBio HiFi + Hi-C	Chr7	Small	363740493	363771910	11	31417
Sikem	PacBio HiFi + Hi-C	Chr1	Small	106497107	106528518	15	31411
Sikem	PacBio HiFi + Hi-C	Chr5	Small	89590592	89621988	14	31396
Sikem	PacBio HiFi + Hi-C	Chr2	Small	89524497	89555824	9	31327
Sikem	PacBio HiFi + Hi-C	Chr3	Small	383083502	383114808	10	31306
Sikem	PacBio HiFi + Hi-C	Chr3	Small	83176425	83207508	6	31083
Sikem	PacBio HiFi + Hi-C	Chr6	Small	43715849	43746804	14	30955
Sikem	PacBio HiFi + Hi-C	Chr7	Small	3145452	3176329	24	30877
Sikem	PacBio HiFi + Hi-C	Chr4	Small	38273704	38304507	21	30803
Sikem	PacBio HiFi + Hi-C	Chr6	Small	40166604	40197352	6	30748
Sikem	PacBio HiFi + Hi-C	Chr2	Small	210404520	210435123	7	30603
Sikem	PacBio HiFi + Hi-C	Chr3	Small	191150183	191180777	21	30594
Sikem	PacBio HiFi + Hi-C	Chr3	Small	75845227	75875787	9	30560
Sikem	PacBio HiFi + Hi-C	Chr7	Small	163481288	163511776	7	30488
Sikem	PacBio HiFi + Hi-C	Chr7	Small	81566515	81596990	7	30475
Sikem	PacBio HiFi + Hi-C	Chr7	Small	214779749	214810135	11	30386
Sikem	PacBio HiFi + Hi-C	Chr7	Small	34120229	34150588	34	30359
Sikem	PacBio HiFi + Hi-C	Chr4	Small	236206504	236236825	6	30321
Sikem	PacBio HiFi + Hi-C	Chr4	Small	128157384	128187666	12	30282
Sikem	PacBio HiFi + Hi-C	Chr3	Small	2693313	2723585	11	30272
Sikem	PacBio HiFi + Hi-C	Chr4	Small	3545543	3575757	18	30214
Sikem	PacBio HiFi + Hi-C	Chr7	Small	146028439	146058531	18	30092
Sikem	PacBio HiFi + Hi-C	Chr4	Small	349057829	349087861	3	30032
Sikem	PacBio HiFi + Hi-C	Chr7	Small	153494652	153524577	17	29925
Sikem	PacBio HiFi + Hi-C	Chr2	Small	251220993	251250878	11	29885
Sikem	PacBio HiFi + Hi-C	Chr5	Small	63418141	63448022	3	29881
Sikem	PacBio HiFi + Hi-C	Chr4	Small	297520340	297550148	26	29808
Sikem	PacBio HiFi + Hi-C	Chr1	Small	105915953	105945752	11	29799
Sikem	PacBio HiFi + Hi-C	Chr4	Small	191344282	191374052	15	29770
Sikem	PacBio HiFi + Hi-C	Chr1	Small	49998197	50027953	13	29756
Sikem	PacBio HiFi + Hi-C	Chr5	Small	27662410	27692119	13	29709
Sikem	PacBio HiFi + Hi-C	Chr3	Small	198228568	198258201	10	29633
Sikem	PacBio HiFi + Hi-C	Chr6	Small	112498718	112528302	8	29584
Sikem	PacBio HiFi + Hi-C	Chr4	Small	158842589	158872117	7	29528
Sikem	PacBio HiFi + Hi-C	Chr6	Small	106275330	106304846	18	29516
Sikem	PacBio HiFi + Hi-C	Chr3	Small	147211654	147241109	6	29455
Sikem	PacBio HiFi + Hi-C	Chr5	Small	255874413	255903858	20	29445
Sikem	PacBio HiFi + Hi-C	Chr4	Small	127322368	127351729	9	29361
Sikem	PacBio HiFi + Hi-C	Chr7	Small	361056770	361086077	14	29307
Sikem	PacBio HiFi + Hi-C	Chr3	Small	388174794	388204023	21	29229
Sikem	PacBio HiFi + Hi-C	Chr7	Small	137926154	137955371	7	29217
Sikem	PacBio HiFi + Hi-C	Chr1	Small	231593973	231623133	6	29160
Sikem	PacBio HiFi + Hi-C	Chr3	Small	124960932	124990030	14	29098
Sikem	PacBio HiFi + Hi-C	Chr4	Small	147848814	147877821	14	29007
Sikem	PacBio HiFi + Hi-C	Chr2	Small	195538908	195567832	12	28924
Sikem	PacBio HiFi + Hi-C	Chr3	Small	88645537	88674447	7	28910
Sikem	PacBio HiFi + Hi-C	Chr2	Small	76901562	76930428	29	28866
Sikem	PacBio HiFi + Hi-C	Chr1	Small	7493187	7522033	8	28846
Sikem	PacBio HiFi + Hi-C	Chr1	Small	103201044	103229857	8	28813
Sikem	PacBio HiFi + Hi-C	Chr1	Small	2272927	2301538	11	28611
Sikem	PacBio HiFi + Hi-C	Chr1	Small	135102869	135131480	18	28611
Sikem	PacBio HiFi + Hi-C	Chr5	Small	151566659	151595064	11	28405
Sikem	PacBio HiFi + Hi-C	Chr5	Small	136960074	136988349	5	28275
Sikem	PacBio HiFi + Hi-C	Chr5	Small	108146365	108174621	26	28256
Sikem	PacBio HiFi + Hi-C	Chr6	Small	21264334	21292509	17	28175
Sikem	PacBio HiFi + Hi-C	Chr6	Small	96327153	96355284	4	28131
Sikem	PacBio HiFi + Hi-C	Chr5	Small	161989780	162017785	7	28005
Sikem	PacBio HiFi + Hi-C	Chr1	Small	105734576	105762518	5	27942
Sikem	PacBio HiFi + Hi-C	Chr4	Small	225420213	225448035	4	27822
Sikem	PacBio HiFi + Hi-C	Chr5	Small	113667058	113694849	7	27791
Sikem	PacBio HiFi + Hi-C	Chr7	Small	345078506	345106277	25	27771
Sikem	PacBio HiFi + Hi-C	Chr7	Small	185340737	185368374	9	27637
Sikem	PacBio HiFi + Hi-C	Chr6	Small	14012460	14040095	3	27635
Sikem	PacBio HiFi + Hi-C	Chr5	Small	98111923	98139555	3	27632
Sikem	PacBio HiFi + Hi-C	Chr4	Small	328865202	328892832	12	27630
Sikem	PacBio HiFi + Hi-C	Chr2	Small	142408068	142435562	14	27494
Sikem	PacBio HiFi + Hi-C	Chr1	Small	251576865	251604330	28	27465
Sikem	PacBio HiFi + Hi-C	Chr3	Small	51056033	51083497	15	27464
Sikem	PacBio HiFi + Hi-C	Chr4	Small	184702971	184730411	11	27440
Sikem	PacBio HiFi + Hi-C	Chr2	Small	101476653	101504044	24	27391
Sikem	PacBio HiFi + Hi-C	Chr1	Small	216634994	216662372	6	27378
Sikem	PacBio HiFi + Hi-C	Chr5	Small	122423506	122450881	3	27375
Sikem	PacBio HiFi + Hi-C	Chr6	Small	228549360	228576573	11	27213
Sikem	PacBio HiFi + Hi-C	Chr4	Small	29397174	29424363	6	27189
Sikem	PacBio HiFi + Hi-C	Chr3	Small	40561224	40588388	10	27164
Sikem	PacBio HiFi + Hi-C	Chr5	Small	45451349	45478502	14	27153
Sikem	PacBio HiFi + Hi-C	Chr6	Small	88520255	88547379	3	27124
Sikem	PacBio HiFi + Hi-C	Chr1	Small	104935461	104962552	7	27091
Sikem	PacBio HiFi + Hi-C	Chr5	Small	65758056	65785104	19	27048
Sikem	PacBio HiFi + Hi-C	Chr3	Small	14145391	14172430	18	27039
Sikem	PacBio HiFi + Hi-C	Chr4	Small	426880811	426907827	9	27016
Sikem	PacBio HiFi + Hi-C	Chr4	Small	126010233	126037234	17	27001
Sikem	PacBio HiFi + Hi-C	Chr5	Small	118144610	118171561	28	26951
Sikem	PacBio HiFi + Hi-C	Chr1	Small	81278690	81305353	4	26663
Sikem	PacBio HiFi + Hi-C	Chr5	Small	228934508	228961169	7	26661
Sikem	PacBio HiFi + Hi-C	Chr2	Small	85244037	85270654	7	26617
Sikem	PacBio HiFi + Hi-C	Chr2	Small	15615090	15641635	8	26545
Sikem	PacBio HiFi + Hi-C	Chr2	Small	55976374	56002801	12	26427
Sikem	PacBio HiFi + Hi-C	Chr5	Small	85132318	85158737	10	26419
Sikem	PacBio HiFi + Hi-C	Chr3	Small	129573971	129600350	23	26379
Sikem	PacBio HiFi + Hi-C	Chr3	Small	18123975	18150322	12	26347
Sikem	PacBio HiFi + Hi-C	Chr5	Small	58378370	58404691	18	26321
Sikem	PacBio HiFi + Hi-C	Chr4	Small	195515431	195541713	8	26282
Sikem	PacBio HiFi + Hi-C	Chr1	Small	57844532	57870809	6	26277
Sikem	PacBio HiFi + Hi-C	Chr4	Small	80169643	80195920	10	26277
Sikem	PacBio HiFi + Hi-C	Chr3	Small	76714060	76740328	7	26268
Sikem	PacBio HiFi + Hi-C	Chr6	Small	43074858	43101023	12	26165
Sikem	PacBio HiFi + Hi-C	Chr1	Small	191375693	191401784	8	26091
Sikem	PacBio HiFi + Hi-C	Chr7	Small	263408815	263434815	3	26000
Sikem	PacBio HiFi + Hi-C	Chr7	Small	174685926	174711880	5	25954
Sikem	PacBio HiFi + Hi-C	Chr6	Small	223455803	223481743	20	25940
Sikem	PacBio HiFi + Hi-C	Chr7	Small	173692375	173718303	11	25928
Sikem	PacBio HiFi + Hi-C	Chr2	Small	177371335	177397196	15	25861
Sikem	PacBio HiFi + Hi-C	Chr3	Small	310644441	310670258	4	25817
Sikem	PacBio HiFi + Hi-C	Chr1	Small	272711451	272737248	25	25797
Sikem	PacBio HiFi + Hi-C	Chr2	Small	198851574	198877329	10	25755
Sikem	PacBio HiFi + Hi-C	Chr3	Small	212929113	212954852	4	25739
Sikem	PacBio HiFi + Hi-C	Chr5	Small	127332033	127357768	13	25735
Sikem	PacBio HiFi + Hi-C	Chr1	Small	218912508	218938234	7	25726
Sikem	PacBio HiFi + Hi-C	Chr7	Small	148154863	148180527	4	25664
Sikem	PacBio HiFi + Hi-C	Chr6	Small	24274128	24299787	14	25659
Sikem	PacBio HiFi + Hi-C	Chr3	Small	24418467	24444015	36	25548
Sikem	PacBio HiFi + Hi-C	Chr4	Small	46850141	46875668	7	25527
Sikem	PacBio HiFi + Hi-C	Chr5	Small	89859744	89885266	8	25522
Sikem	PacBio HiFi + Hi-C	Chr2	Small	277336195	277361709	4	25514
Sikem	PacBio HiFi + Hi-C	Chr5	Small	211464379	211489853	15	25474
Sikem	PacBio HiFi + Hi-C	Chr3	Small	252573751	252599166	15	25415
Sikem	PacBio HiFi + Hi-C	Chr5	Small	97186658	97211900	3	25242
Sikem	PacBio HiFi + Hi-C	Chr6	Small	21544631	21569872	28	25241
Sikem	PacBio HiFi + Hi-C	Chr4	Small	200705013	200730228	10	25215
Sikem	PacBio HiFi + Hi-C	Chr7	Small	239003572	239028767	5	25195
Sikem	PacBio HiFi + Hi-C	Chr1	Small	255496101	255521254	6	25153
Sikem	PacBio HiFi + Hi-C	Chr1	Small	81972622	81997774	7	25152
Sikem	PacBio HiFi + Hi-C	Chr5	Small	6287757	6312866	35	25109
Sikem	PacBio HiFi + Hi-C	Chr2	Small	166333471	166358552	4	25081
Sikem	PacBio HiFi + Hi-C	Chr4	Small	2492392	2517348	18	24956
Sikem	PacBio HiFi + Hi-C	Chr4	Small	217597249	217622168	13	24919
Sikem	PacBio HiFi + Hi-C	Chr7	Small	86940965	86965875	4	24910
Sikem	PacBio HiFi + Hi-C	Chr2	Small	32792449	32817326	17	24877
Sikem	PacBio HiFi + Hi-C	Chr3	Small	188756389	188781242	76	24853
Sikem	PacBio HiFi + Hi-C	Chr2	Small	181732020	181756819	2	24799
Sikem	PacBio HiFi + Hi-C	Chr6	Small	237456464	237481226	14	24762
Sikem	PacBio HiFi + Hi-C	Chr1	Small	34528408	34553163	9	24755
Sikem	PacBio HiFi + Hi-C	Chr3	Small	15607663	15632281	21	24618
Sikem	PacBio HiFi + Hi-C	Chr1	Small	119241066	119265683	6	24617
Sikem	PacBio HiFi + Hi-C	Chr4	Small	338765337	338789895	12	24558
Sikem	PacBio HiFi + Hi-C	Chr7	Small	43552150	43576653	15	24503
Sikem	PacBio HiFi + Hi-C	Chr5	Small	24919869	24944346	7	24477
Sikem	PacBio HiFi + Hi-C	Chr3	Small	6072310	6096711	14	24401
Sikem	PacBio HiFi + Hi-C	Chr6	Small	45110495	45134855	4	24360
Sikem	PacBio HiFi + Hi-C	Chr2	Small	32126365	32150686	9	24321
Sikem	PacBio HiFi + Hi-C	Chr4	Small	20888598	20912897	12	24299
Sikem	PacBio HiFi + Hi-C	Chr7	Small	71990408	72014696	8	24288
Sikem	PacBio HiFi + Hi-C	Chr6	Small	6940588	6964805	17	24217
Sikem	PacBio HiFi + Hi-C	Chr7	Small	228053993	228078122	7	24129
Sikem	PacBio HiFi + Hi-C	Chr7	Small	16964915	16988993	12	24078
Sikem	PacBio HiFi + Hi-C	Chr3	Small	14070054	14094128	10	24074
Sikem	PacBio HiFi + Hi-C	Chr6	Small	222625860	222649893	4	24033
Sikem	PacBio HiFi + Hi-C	Chr3	Small	362915786	362939767	7	23981
Sikem	PacBio HiFi + Hi-C	Chr5	Small	201803326	201827275	8	23949
Sikem	PacBio HiFi + Hi-C	Chr7	Small	262841309	262865237	29	23928
Sikem	PacBio HiFi + Hi-C	Chr1	Small	105143959	105167827	6	23868
Sikem	PacBio HiFi + Hi-C	Chr2	Small	187776797	187800651	3	23854
Sikem	PacBio HiFi + Hi-C	Chr2	Small	83773094	83796882	3	23788
Sikem	PacBio HiFi + Hi-C	Chr2	Small	8130560	8154318	22	23758
Sikem	PacBio HiFi + Hi-C	Chr6	Small	107382176	107405822	8	23646
Sikem	PacBio HiFi + Hi-C	Chr2	Small	181451355	181474979	14	23624
Sikem	PacBio HiFi + Hi-C	Chr7	Small	146224859	146248371	4	23512
Sikem	PacBio HiFi + Hi-C	Chr4	Small	130493991	130517417	12	23426
Sikem	PacBio HiFi + Hi-C	Chr4	Small	371616823	371640197	37	23374
Sikem	PacBio HiFi + Hi-C	Chr4	Small	403648937	403672287	2	23350
Sikem	PacBio HiFi + Hi-C	Chr4	Small	335329898	335353239	15	23341
Sikem	PacBio HiFi + Hi-C	Chr4	Small	262617976	262641310	3	23334
Sikem	PacBio HiFi + Hi-C	Chr4	Small	265583981	265607294	5	23313
Sikem	PacBio HiFi + Hi-C	Chr4	Small	33538267	33561572	6	23305
Sikem	PacBio HiFi + Hi-C	Chr7	Small	212551269	212574495	7	23226
Sikem	PacBio HiFi + Hi-C	Chr5	Small	20779293	20802488	19	23195
Sikem	PacBio HiFi + Hi-C	Chr4	Small	193567970	193591024	6	23054
Sikem	PacBio HiFi + Hi-C	Chr6	Small	113614580	113637620	6	23040
Sikem	PacBio HiFi + Hi-C	Chr6	Small	102213589	102236569	2	22980
Sikem	PacBio HiFi + Hi-C	Chr3	Small	285810557	285833524	4	22967
Sikem	PacBio HiFi + Hi-C	Chr5	Small	189202934	189225887	4	22953
Sikem	PacBio HiFi + Hi-C	Chr4	Small	157912478	157935369	18	22891
Sikem	PacBio HiFi + Hi-C	Chr1	Small	67177023	67199909	10	22886
Sikem	PacBio HiFi + Hi-C	Chr4	Small	73389942	73412784	11	22842
Sikem	PacBio HiFi + Hi-C	Chr2	Small	111225556	111248349	15	22793
Sikem	PacBio HiFi + Hi-C	Chr2	Small	225779278	225802062	9	22784
Sikem	PacBio HiFi + Hi-C	Chr5	Small	112582570	112605329	11	22759
Sikem	PacBio HiFi + Hi-C	Chr4	Small	178747160	178769909	5	22749
Sikem	PacBio HiFi + Hi-C	Chr1	Small	238932987	238955717	6	22730
Sikem	PacBio HiFi + Hi-C	Chr4	Small	423505082	423527763	18	22681
Sikem	PacBio HiFi + Hi-C	Chr5	Small	245267024	245289695	23	22671
Sikem	PacBio HiFi + Hi-C	Chr4	Small	53526695	53549346	7	22651
Sikem	PacBio HiFi + Hi-C	Chr7	Small	234563049	234585644	5	22595
Sikem	PacBio HiFi + Hi-C	Chr3	Small	29563587	29586175	11	22588
Sikem	PacBio HiFi + Hi-C	Chr2	Small	135446419	135468920	4	22501
Sikem	PacBio HiFi + Hi-C	Chr2	Small	181687832	181710286	7	22454
Sikem	PacBio HiFi + Hi-C	Chr2	Small	85336143	85358547	4	22404
Sikem	PacBio HiFi + Hi-C	Chr6	Small	20812939	20835327	11	22388
Sikem	PacBio HiFi + Hi-C	Chr5	Small	95024416	95046793	14	22377
Sikem	PacBio HiFi + Hi-C	Chr7	Small	322929594	322951914	2	22320
Sikem	PacBio HiFi + Hi-C	Chr5	Small	60970667	60992974	9	22307
Sikem	PacBio HiFi + Hi-C	Chr1	Small	27873986	27896268	7	22282
Sikem	PacBio HiFi + Hi-C	Chr4	Small	365467115	365489364	11	22249
Sikem	PacBio HiFi + Hi-C	Chr4	Small	273955600	273977819	10	22219
Sikem	PacBio HiFi + Hi-C	Chr3	Small	380520134	380542330	7	22196
Sikem	PacBio HiFi + Hi-C	Chr4	Small	422789570	422811754	2	22184
Sikem	PacBio HiFi + Hi-C	Chr2	Small	65358740	65380920	23	22180
Sikem	PacBio HiFi + Hi-C	Chr7	Small	181294741	181316904	3	22163
Sikem	PacBio HiFi + Hi-C	Chr1	Small	164187260	164209421	15	22161
Sikem	PacBio HiFi + Hi-C	Chr4	Small	296174777	296196923	5	22146
Sikem	PacBio HiFi + Hi-C	Chr3	Small	100462465	100484601	38	22136
Sikem	PacBio HiFi + Hi-C	Chr6	Small	121565861	121587988	5	22127
Sikem	PacBio HiFi + Hi-C	Chr3	Small	16061355	16083474	8	22119
Sikem	PacBio HiFi + Hi-C	Chr5	Small	45921134	45943226	8	22092
Sikem	PacBio HiFi + Hi-C	Chr4	Small	296541372	296563456	23	22084
Sikem	PacBio HiFi + Hi-C	Chr5	Small	57870642	57892719	5	22077
Sikem	PacBio HiFi + Hi-C	Chr3	Small	175176022	175198073	5	22051
Sikem	PacBio HiFi + Hi-C	Chr3	Small	310752630	310774637	5	22007
Sikem	PacBio HiFi + Hi-C	Chr4	Small	124191745	124213678	9	21933
Sikem	PacBio HiFi + Hi-C	Chr3	Small	88466319	88488213	8	21894
Sikem	PacBio HiFi + Hi-C	Chr7	Small	317067999	317089887	9	21888
Sikem	PacBio HiFi + Hi-C	Chr2	Small	202482598	202504479	4	21881
Sikem	PacBio HiFi + Hi-C	Chr2	Small	165651923	165673654	2	21731
Sikem	PacBio HiFi + Hi-C	Chr4	Small	363568481	363590160	12	21679
Sikem	PacBio HiFi + Hi-C	Chr1	Small	239454257	239475914	7	21657
Sikem	PacBio HiFi + Hi-C	Chr5	Small	162046246	162067880	9	21634
Sikem	PacBio HiFi + Hi-C	Chr4	Small	420520698	420542330	11	21632
Sikem	PacBio HiFi + Hi-C	Chr7	Small	195020589	195042195	46	21606
Sikem	PacBio HiFi + Hi-C	Chr3	Small	112898725	112920325	10	21600
Sikem	PacBio HiFi + Hi-C	Chr2	Small	77977805	77999392	6	21587
Sikem	PacBio HiFi + Hi-C	Chr4	Small	230393778	230415348	28	21570
Sikem	PacBio HiFi + Hi-C	Chr2	Small	237326721	237348256	7	21535
Sikem	PacBio HiFi + Hi-C	Chr5	Small	110209136	110230661	21	21525
Sikem	PacBio HiFi + Hi-C	Chr1	Small	25224517	25246032	13	21515
Sikem	PacBio HiFi + Hi-C	Chr1	Small	157255905	157277417	3	21512
Sikem	PacBio HiFi + Hi-C	Chr4	Small	297452297	297473757	6	21460
Sikem	PacBio HiFi + Hi-C	Chr3	Small	166743193	166764647	3	21454
Sikem	PacBio HiFi + Hi-C	Chr2	Small	171864579	171886023	3	21444
Sikem	PacBio HiFi + Hi-C	Chr7	Small	145862980	145884375	10	21395
Sikem	PacBio HiFi + Hi-C	Chr1	Small	249213561	249234910	3	21349
Sikem	PacBio HiFi + Hi-C	Chr7	Small	254195931	254217266	5	21335
Sikem	PacBio HiFi + Hi-C	Chr5	Small	94705429	94726742	8	21313
Sikem	PacBio HiFi + Hi-C	Chr5	Small	191514787	191536091	5	21304
Sikem	PacBio HiFi + Hi-C	Chr5	Small	86415153	86436454	17	21301
Sikem	PacBio HiFi + Hi-C	Chr3	Small	213009530	213030791	18	21261
Sikem	PacBio HiFi + Hi-C	Chr2	Small	56289481	56310719	11	21238
Sikem	PacBio HiFi + Hi-C	Chr2	Small	185261731	185282952	14	21221
Sikem	PacBio HiFi + Hi-C	Chr4	Small	317080298	317101479	20	21181
Sikem	PacBio HiFi + Hi-C	Chr3	Small	333699570	333720732	10	21162
Sikem	PacBio HiFi + Hi-C	Chr3	Small	111619523	111640680	4	21157
Sikem	PacBio HiFi + Hi-C	Chr6	Small	194530079	194551230	20	21151
Sikem	PacBio HiFi + Hi-C	Chr7	Small	170814872	170835998	28	21126
Sikem	PacBio HiFi + Hi-C	Chr4	Small	306404212	306425281	7	21069
Sikem	PacBio HiFi + Hi-C	Chr5	Small	35235485	35256546	24	21061
Sikem	PacBio HiFi + Hi-C	Chr1	Small	44885391	44906443	5	21052
Sikem	PacBio HiFi + Hi-C	Chr7	Small	150648401	150669453	59	21052
Sikem	PacBio HiFi + Hi-C	Chr7	Small	56651304	56672349	16	21045
Sikem	PacBio HiFi + Hi-C	Chr6	Small	254524986	254546017	11	21031
Sikem	PacBio HiFi + Hi-C	Chr4	Small	218451695	218472688	2	20993
Sikem	PacBio HiFi + Hi-C	Chr4	Small	358788769	358809683	2	20914
Sikem	PacBio HiFi + Hi-C	Chr3	Small	368329722	368350582	34	20860
Sikem	PacBio HiFi + Hi-C	Chr5	Small	198135424	198156277	10	20853
Sikem	PacBio HiFi + Hi-C	Chr6	Small	16747037	16767864	28	20827
Sikem	PacBio HiFi + Hi-C	Chr6	Small	20929254	20950061	6	20807
Sikem	PacBio HiFi + Hi-C	Chr4	Small	202600966	202621740	6	20774
Sikem	PacBio HiFi + Hi-C	Chr7	Small	149734436	149755209	9	20773
Sikem	PacBio HiFi + Hi-C	Chr7	Small	81758845	81779605	24	20760
Sikem	PacBio HiFi + Hi-C	Chr5	Small	94830384	94851015	12	20631
Sikem	PacBio HiFi + Hi-C	Chr3	Small	93436738	93457345	2	20607
Sikem	PacBio HiFi + Hi-C	Chr5	Small	94521982	94542523	13	20541
Sikem	PacBio HiFi + Hi-C	Chr3	Small	331548395	331568931	11	20536
Sikem	PacBio HiFi + Hi-C	Chr5	Small	68366912	68387390	2	20478
Sikem	PacBio HiFi + Hi-C	Chr5	Small	96860839	96881206	2	20367
Sikem	PacBio HiFi + Hi-C	Chr4	Small	168307009	168327363	54	20354
Sikem	PacBio HiFi + Hi-C	Chr3	Small	146933667	146953999	9	20332
Sikem	PacBio HiFi + Hi-C	Chr5	Small	104273418	104293730	7	20312
Sikem	PacBio HiFi + Hi-C	Chr6	Small	109377058	109397351	7	20293
Sikem	PacBio HiFi + Hi-C	Chr2	Small	166599240	166619516	2	20276
Sikem	PacBio HiFi + Hi-C	Chr3	Small	167231474	167251688	24	20214
Sikem	PacBio HiFi + Hi-C	Chr2	Small	165326201	165346401	3	20200
Sikem	PacBio HiFi + Hi-C	Chr4	Small	177542590	177562770	42	20180
Sikem	PacBio HiFi + Hi-C	Chr3	Small	129214403	129234571	8	20168
Sikem	PacBio HiFi + Hi-C	Chr6	Small	108707481	108727623	5	20142
Sikem	PacBio HiFi + Hi-C	Chr7	Small	216131883	216152018	13	20135
Sikem	PacBio HiFi + Hi-C	Chr3	Small	240126636	240146666	16	20030
Sikem	PacBio HiFi + Hi-C	Chr3	Small	129340367	129360302	13	19935
Sikem	PacBio HiFi + Hi-C	Chr4	Small	171190978	171210909	4	19931
Sikem	PacBio HiFi + Hi-C	Chr3	Small	233104813	233124738	5	19925
Sikem	PacBio HiFi + Hi-C	Chr1	Small	139834540	139854458	5	19918
Sikem	PacBio HiFi + Hi-C	Chr7	Small	254092944	254112861	25	19917
Sikem	PacBio HiFi + Hi-C	Chr4	Small	351898373	351918284	24	19911
Sikem	PacBio HiFi + Hi-C	Chr4	Small	69692034	69711921	8	19887
Sikem	PacBio HiFi + Hi-C	Chr3	Small	144137303	144157142	4	19839
Sikem	PacBio HiFi + Hi-C	Chr4	Small	38335446	38355262	12	19816
Sikem	PacBio HiFi + Hi-C	Chr7	Small	244415061	244434869	15	19808
Sikem	PacBio HiFi + Hi-C	Chr3	Small	6536994	6556798	8	19804
Sikem	PacBio HiFi + Hi-C	Chr6	Small	214492749	214512518	11	19769
Sikem	PacBio HiFi + Hi-C	Chr4	Small	165699249	165719012	9	19763
Sikem	PacBio HiFi + Hi-C	Chr4	Small	46271307	46291015	3	19708
Sikem	PacBio HiFi + Hi-C	Chr2	Small	177753786	177773454	9	19668
Sikem	PacBio HiFi + Hi-C	Chr5	Small	46780140	46799770	4	19630
Sikem	PacBio HiFi + Hi-C	Chr7	Small	311216939	311236560	5	19621
Sikem	PacBio HiFi + Hi-C	Chr3	Small	146178955	146198562	2	19607
Sikem	PacBio HiFi + Hi-C	Chr3	Small	44490284	44509868	6	19584
Sikem	PacBio HiFi + Hi-C	Chr6	Small	108357949	108377530	10	19581
Sikem	PacBio HiFi + Hi-C	Chr6	Small	120649249	120668824	15	19575
Sikem	PacBio HiFi + Hi-C	Chr1	Small	105987256	106006825	2	19569
Sikem	PacBio HiFi + Hi-C	Chr4	Small	1674604	1694135	9	19531
Sikem	PacBio HiFi + Hi-C	Chr2	Small	76627378	76646732	14	19354
Sikem	PacBio HiFi + Hi-C	Chr1	Small	15667978	15687318	9	19340
Sikem	PacBio HiFi + Hi-C	Chr2	Small	160535062	160554394	8	19332
Sikem	PacBio HiFi + Hi-C	Chr7	Small	286505995	286525285	8	19290
Sikem	PacBio HiFi + Hi-C	Chr6	Small	20643700	20662988	3	19288
Sikem	PacBio HiFi + Hi-C	Chr3	Small	47322940	47342189	6	19249
Sikem	PacBio HiFi + Hi-C	Chr3	Small	170603038	170622280	7	19242
Sikem	PacBio HiFi + Hi-C	Chr7	Small	202651475	202670575	9	19100
Sikem	PacBio HiFi + Hi-C	Chr2	Small	63576819	63595911	2	19092
Sikem	PacBio HiFi + Hi-C	Chr2	Small	188577557	188596645	2	19088
Sikem	PacBio HiFi + Hi-C	Chr5	Small	37910458	37929523	12	19065
Sikem	PacBio HiFi + Hi-C	Chr4	Small	314372502	314391560	12	19058
Sikem	PacBio HiFi + Hi-C	Chr7	Small	249988915	250007966	4	19051
Sikem	PacBio HiFi + Hi-C	Chr4	Small	236038612	236057632	4	19020
Sikem	PacBio HiFi + Hi-C	Chr1	Small	15532816	15551779	21	18963
Sikem	PacBio HiFi + Hi-C	Chr7	Small	39180751	39199692	5	18941
Sikem	PacBio HiFi + Hi-C	Chr1	Small	43436203	43455067	3	18864
Sikem	PacBio HiFi + Hi-C	Chr6	Small	108593331	108612129	5	18798
Sikem	PacBio HiFi + Hi-C	Chr2	Small	71974425	71993178	7	18753
Sikem	PacBio HiFi + Hi-C	Chr3	Small	373320460	373339210	7	18750
Sikem	PacBio HiFi + Hi-C	Chr7	Small	214595440	214614174	34	18734
Sikem	PacBio HiFi + Hi-C	Chr7	Small	223371306	223390040	12	18734
Sikem	PacBio HiFi + Hi-C	Chr7	Small	12450612	12469331	5	18719
Sikem	PacBio HiFi + Hi-C	Chr1	Small	37950441	37969144	7	18703
Sikem	PacBio HiFi + Hi-C	Chr4	Small	115269831	115288480	19	18649
Sikem	PacBio HiFi + Hi-C	Chr5	Small	91557528	91576171	10	18643
Sikem	PacBio HiFi + Hi-C	Chr3	Small	251850477	251869042	3	18565
Sikem	PacBio HiFi + Hi-C	Chr5	Small	186455130	186473666	10	18536
Sikem	PacBio HiFi + Hi-C	Chr4	Small	74808719	74827227	3	18508
Sikem	PacBio HiFi + Hi-C	Chr7	Small	233309701	233328148	4	18447
Sikem	PacBio HiFi + Hi-C	Chr3	Small	172726969	172745409	4	18440
Sikem	PacBio HiFi + Hi-C	Chr4	Small	156098065	156116477	30	18412
Sikem	PacBio HiFi + Hi-C	Chr1	Small	144576837	144595229	8	18392
Sikem	PacBio HiFi + Hi-C	Chr7	Small	168669369	168687732	5	18363
Sikem	PacBio HiFi + Hi-C	Chr4	Small	297368159	297386520	5	18361
Sikem	PacBio HiFi + Hi-C	Chr1	Small	216460194	216478544	6	18350
Sikem	PacBio HiFi + Hi-C	Chr2	Small	256122674	256141023	7	18349
Sikem	PacBio HiFi + Hi-C	Chr4	Small	328929492	328947824	4	18332
Sikem	PacBio HiFi + Hi-C	Chr3	Small	130397300	130415623	23	18323
Sikem	PacBio HiFi + Hi-C	Chr2	Small	181778802	181797122	2	18320
Sikem	PacBio HiFi + Hi-C	Chr7	Small	251549982	251568298	5	18316
Sikem	PacBio HiFi + Hi-C	Chr5	Small	88107539	88125825	4	18286
Sikem	PacBio HiFi + Hi-C	Chr4	Small	160371726	160390004	2	18278
Sikem	PacBio HiFi + Hi-C	Chr7	Small	350091413	350109690	10	18277
Sikem	PacBio HiFi + Hi-C	Chr4	Small	363120327	363138534	9	18207
Sikem	PacBio HiFi + Hi-C	Chr3	Small	13511557	13529750	7	18193
Sikem	PacBio HiFi + Hi-C	Chr3	Small	155316338	155334515	5	18177
Sikem	PacBio HiFi + Hi-C	Chr5	Small	50010685	50028861	15	18176
Sikem	PacBio HiFi + Hi-C	Chr4	Small	202730815	202748970	4	18155
Sikem	PacBio HiFi + Hi-C	Chr3	Small	40145302	40163427	7	18125
Sikem	PacBio HiFi + Hi-C	Chr5	Small	147055128	147073249	6	18121
Sikem	PacBio HiFi + Hi-C	Chr1	Small	147808411	147826468	2	18057
Sikem	PacBio HiFi + Hi-C	Chr1	Small	168860114	168878150	2	18036
Sikem	PacBio HiFi + Hi-C	Chr3	Small	30182994	30201029	5	18035
Sikem	PacBio HiFi + Hi-C	Chr3	Small	145592307	145610327	3	18020
Sikem	PacBio HiFi + Hi-C	Chr4	Small	348696879	348714885	4	18006
Sikem	PacBio HiFi + Hi-C	Chr4	Small	127108162	127126159	2	17997
Sikem	PacBio HiFi + Hi-C	Chr5	Small	49526711	49544690	3	17979
Sikem	PacBio HiFi + Hi-C	Chr2	Small	81161630	81179572	3	17942
Sikem	PacBio HiFi + Hi-C	Chr6	Small	56350558	56368471	72	17913
Sikem	PacBio HiFi + Hi-C	Chr7	Small	150092547	150110429	19	17882
Sikem	PacBio HiFi + Hi-C	Chr1	Small	51868181	51886052	3	17871
Sikem	PacBio HiFi + Hi-C	Chr5	Small	1006338	1024184	9	17846
Sikem	PacBio HiFi + Hi-C	Chr5	Small	45875181	45892980	7	17799
Sikem	PacBio HiFi + Hi-C	Chr7	Small	146689431	146707198	6	17767
Sikem	PacBio HiFi + Hi-C	Chr7	Small	181886482	181904205	7	17723
Sikem	PacBio HiFi + Hi-C	Chr6	Small	162514857	162532572	3	17715
Sikem	PacBio HiFi + Hi-C	Chr3	Small	375008488	375026202	9	17714
Sikem	PacBio HiFi + Hi-C	Chr7	Small	120907293	120925005	13	17712
Sikem	PacBio HiFi + Hi-C	Chr7	Small	147201810	147219502	5	17692
Sikem	PacBio HiFi + Hi-C	Chr7	Small	130633548	130651233	3	17685
Sikem	PacBio HiFi + Hi-C	Chr1	Small	134040597	134058227	12	17630
Sikem	PacBio HiFi + Hi-C	Chr4	Small	27200985	27218610	5	17625
Sikem	PacBio HiFi + Hi-C	Chr3	Small	2532681	2550300	12	17619
Sikem	PacBio HiFi + Hi-C	Chr2	Small	307571103	307588709	3	17606
Sikem	PacBio HiFi + Hi-C	Chr2	Small	245356425	245373803	4	17378
Sikem	PacBio HiFi + Hi-C	Chr5	Small	62902099	62919465	12	17366
Sikem	PacBio HiFi + Hi-C	Chr5	Small	97272893	97290169	2	17276
Sikem	PacBio HiFi + Hi-C	Chr6	Small	147997525	148014770	8	17245
Sikem	PacBio HiFi + Hi-C	Chr6	Small	128089832	128107076	12	17244
Sikem	PacBio HiFi + Hi-C	Chr6	Small	81151493	81168678	3	17185
Sikem	PacBio HiFi + Hi-C	Chr2	Small	9383411	9400585	16	17174
Sikem	PacBio HiFi + Hi-C	Chr2	Small	183507852	183525015	2	17163
Sikem	PacBio HiFi + Hi-C	Chr4	Small	225681846	225698997	17	17151
Sikem	PacBio HiFi + Hi-C	Chr4	Small	287908993	287926119	46	17126
Sikem	PacBio HiFi + Hi-C	Chr3	Small	167383351	167400467	3	17116
Sikem	PacBio HiFi + Hi-C	Chr6	Small	107656244	107673344	7	17100
Sikem	PacBio HiFi + Hi-C	Chr4	Small	15530402	15547501	8	17099
Sikem	PacBio HiFi + Hi-C	Chr7	Small	333011380	333028449	11	17069
Sikem	PacBio HiFi + Hi-C	Chr3	Small	41713880	41730945	2	17065
Sikem	PacBio HiFi + Hi-C	Chr6	Small	89135416	89152436	4	17020
Sikem	PacBio HiFi + Hi-C	Chr7	Small	212905707	212922660	3	16953
Sikem	PacBio HiFi + Hi-C	Chr7	Small	226921435	226938300	13	16865
Sikem	PacBio HiFi + Hi-C	Chr5	Small	98343785	98360597	2	16812
Sikem	PacBio HiFi + Hi-C	Chr4	Small	23033245	23050055	9	16810
Sikem	PacBio HiFi + Hi-C	Chr2	Small	119377367	119394171	3	16804
Sikem	PacBio HiFi + Hi-C	Chr3	Small	41401820	41418547	5	16727
Sikem	PacBio HiFi + Hi-C	Chr7	Small	236742939	236759606	16	16667
Sikem	PacBio HiFi + Hi-C	Chr5	Small	57565311	57581951	12	16640
Sikem	PacBio HiFi + Hi-C	Chr7	Small	194392988	194409583	6	16595
Sikem	PacBio HiFi + Hi-C	Chr1	Small	18793731	18810322	2	16591
Sikem	PacBio HiFi + Hi-C	Chr4	Small	225642167	225658735	37	16568
Sikem	PacBio HiFi + Hi-C	Chr1	Small	219865284	219881850	5	16566
Sikem	PacBio HiFi + Hi-C	Chr7	Small	147126464	147143008	7	16544
Sikem	PacBio HiFi + Hi-C	Chr5	Small	62746853	62763390	3	16537
Sikem	PacBio HiFi + Hi-C	Chr4	Small	161983397	161999927	17	16530
Sikem	PacBio HiFi + Hi-C	Chr6	Small	223730452	223746982	5	16530
Sikem	PacBio HiFi + Hi-C	Chr3	Small	323120241	323136769	23	16528
Sikem	PacBio HiFi + Hi-C	Chr2	Small	108262525	108279040	11	16515
Sikem	PacBio HiFi + Hi-C	Chr1	Small	219720894	219737395	4	16501
Sikem	PacBio HiFi + Hi-C	Chr5	Small	121353628	121370126	12	16498
Sikem	PacBio HiFi + Hi-C	Chr4	Small	48517665	48534122	7	16457
Sikem	PacBio HiFi + Hi-C	Chr2	Small	115436302	115452745	9	16443
Sikem	PacBio HiFi + Hi-C	Chr1	Small	99904732	99921133	4	16401
Sikem	PacBio HiFi + Hi-C	Chr7	Small	122328207	122344587	25	16380
Sikem	PacBio HiFi + Hi-C	Chr3	Small	389643584	389659922	7	16338
Sikem	PacBio HiFi + Hi-C	Chr5	Small	234680720	234697042	8	16322
Sikem	PacBio HiFi + Hi-C	Chr1	Small	103425169	103441488	2	16319
Sikem	PacBio HiFi + Hi-C	Chr6	Small	128392522	128408839	2	16317
Sikem	PacBio HiFi + Hi-C	Chr7	Small	251022439	251038707	5	16268
Sikem	PacBio HiFi + Hi-C	Chr6	Small	100840916	100857181	4	16265
Sikem	PacBio HiFi + Hi-C	Chr1	Small	82475128	82491388	2	16260
Sikem	PacBio HiFi + Hi-C	Chr4	Small	176795217	176811475	8	16258
Sikem	PacBio HiFi + Hi-C	Chr3	Small	53438480	53454732	26	16252
Sikem	PacBio HiFi + Hi-C	Chr2	Small	259314020	259330258	4	16238
Sikem	PacBio HiFi + Hi-C	Chr1	Small	211624411	211640644	6	16233
Sikem	PacBio HiFi + Hi-C	Chr7	Small	256291698	256307917	6	16219
Sikem	PacBio HiFi + Hi-C	Chr1	Small	256180981	256197178	33	16197
Sikem	PacBio HiFi + Hi-C	Chr4	Small	367178399	367194592	2	16193
Sikem	PacBio HiFi + Hi-C	Chr2	Small	199810595	199826780	4	16185
Sikem	PacBio HiFi + Hi-C	Chr7	Small	78287252	78303343	3	16091
Sikem	PacBio HiFi + Hi-C	Chr6	Small	220228481	220244542	6	16061
Sikem	PacBio HiFi + Hi-C	Chr5	Small	69848201	69864252	4	16051
Sikem	PacBio HiFi + Hi-C	Chr5	Small	52760650	52776695	9	16045
Sikem	PacBio HiFi + Hi-C	Chr7	Small	228189119	228205151	6	16032
Sikem	PacBio HiFi + Hi-C	Chr7	Small	139530891	139546899	5	16008
Sikem	PacBio HiFi + Hi-C	Chr5	Small	36816392	36832391	7	15999
Sikem	PacBio HiFi + Hi-C	Chr7	Small	94456998	94472951	12	15953
Sikem	PacBio HiFi + Hi-C	Chr5	Small	88882356	88898290	11	15934
Sikem	PacBio HiFi + Hi-C	Chr3	Small	196790332	196806253	70	15921
Sikem	PacBio HiFi + Hi-C	Chr4	Small	183354298	183370196	8	15898
Sikem	PacBio HiFi + Hi-C	Chr1	Small	161470009	161485894	23	15885
Sikem	PacBio HiFi + Hi-C	Chr6	Small	165823992	165839854	4	15862
Sikem	PacBio HiFi + Hi-C	Chr4	Small	116830989	116846847	3	15858
Sikem	PacBio HiFi + Hi-C	Chr7	Small	72108484	72124336	7	15852
Sikem	PacBio HiFi + Hi-C	Chr3	Small	338335781	338351596	8	15815
Sikem	PacBio HiFi + Hi-C	Chr2	Small	161841648	161857453	3	15805
Sikem	PacBio HiFi + Hi-C	Chr2	Small	138819332	138835129	11	15797
Sikem	PacBio HiFi + Hi-C	Chr4	Small	166882309	166898089	5	15780
Sikem	PacBio HiFi + Hi-C	Chr3	Small	96667445	96683157	5	15712
Sikem	PacBio HiFi + Hi-C	Chr7	Small	260911119	260926826	4	15707
Sikem	PacBio HiFi + Hi-C	Chr4	Small	170476834	170492529	3	15695
Sikem	PacBio HiFi + Hi-C	Chr2	Small	115173942	115189635	3	15693
Sikem	PacBio HiFi + Hi-C	Chr7	Small	263143108	263158785	14	15677
Sikem	PacBio HiFi + Hi-C	Chr4	Small	151572570	151588217	5	15647
Sikem	PacBio HiFi + Hi-C	Chr4	Small	73578729	73594373	7	15644
Sikem	PacBio HiFi + Hi-C	Chr3	Small	145688595	145704226	3	15631
Sikem	PacBio HiFi + Hi-C	Chr4	Small	418480900	418496529	2	15629
Sikem	PacBio HiFi + Hi-C	Chr7	Small	151394422	151410049	6	15627
Sikem	PacBio HiFi + Hi-C	Chr2	Small	127363883	127379508	7	15625
Sikem	PacBio HiFi + Hi-C	Chr4	Small	274364484	274380103	15	15619
Sikem	PacBio HiFi + Hi-C	Chr7	Small	172841265	172856831	8	15566
Sikem	PacBio HiFi + Hi-C	Chr2	Small	201259909	201275433	19	15524
Sikem	PacBio HiFi + Hi-C	Chr4	Small	386280696	386296207	17	15511
Sikem	PacBio HiFi + Hi-C	Chr1	Small	103851081	103866588	7	15507
Sikem	PacBio HiFi + Hi-C	Chr5	Small	192266687	192282158	23	15471
Sikem	PacBio HiFi + Hi-C	Chr2	Small	191307211	191322674	6	15463
Sikem	PacBio HiFi + Hi-C	Chr3	Small	41071755	41087156	3	15401
Sikem	PacBio HiFi + Hi-C	Chr3	Small	120969266	120984646	7	15380
Sikem	PacBio HiFi + Hi-C	Chr7	Small	318280377	318295748	10	15371
Sikem	PacBio HiFi + Hi-C	Chr2	Small	15037517	15052865	16	15348
Sikem	PacBio HiFi + Hi-C	Chr6	Small	159570553	159585883	23	15330
Sikem	PacBio HiFi + Hi-C	Chr7	Small	192121273	192136583	4	15310
Sikem	PacBio HiFi + Hi-C	Chr4	Small	375065529	375080823	5	15294
Sikem	PacBio HiFi + Hi-C	Chr7	Small	295250297	295265549	6	15252
Sikem	PacBio HiFi + Hi-C	Chr1	Small	21691311	21706556	13	15245
Sikem	PacBio HiFi + Hi-C	Chr2	Small	165791901	165807145	3	15244
Sikem	PacBio HiFi + Hi-C	Chr2	Small	51807013	51822247	4	15234
Sikem	PacBio HiFi + Hi-C	Chr5	Small	96771913	96787114	5	15201
Sikem	PacBio HiFi + Hi-C	Chr3	Small	61359165	61374355	26	15190
Sikem	PacBio HiFi + Hi-C	Chr5	Small	86718346	86733536	13	15190
Sikem	PacBio HiFi + Hi-C	Chr7	Small	14668078	14683266	4	15188
Sikem	PacBio HiFi + Hi-C	Chr2	Small	113866430	113881613	4	15183
Sikem	PacBio HiFi + Hi-C	Chr3	Small	29285680	29300853	14	15173
Sikem	PacBio HiFi + Hi-C	Chr3	Small	1089078	1104236	5	15158
Sikem	PacBio HiFi + Hi-C	Chr5	Small	203406474	203421624	4	15150
Sikem	PacBio HiFi + Hi-C	Chr4	Small	373536266	373551397	18	15131
Sikem	PacBio HiFi + Hi-C	Chr1	Small	102846048	102861151	2	15103
Sikem	PacBio HiFi + Hi-C	Chr6	Small	146214441	146229509	3	15068
Sikem	PacBio HiFi + Hi-C	Chr4	Small	272615843	272630850	9	15007
Sikem	PacBio HiFi + Hi-C	Chr1	Small	180627509	180642478	2	14969
Sikem	PacBio HiFi + Hi-C	Chr4	Small	89772275	89787238	3	14963
Sikem	PacBio HiFi + Hi-C	Chr7	Small	299709121	299724084	9	14963
Sikem	PacBio HiFi + Hi-C	Chr7	Small	293146069	293161031	2	14962
Sikem	PacBio HiFi + Hi-C	Chr2	Small	58278403	58293364	14	14961
Sikem	PacBio HiFi + Hi-C	Chr2	Small	295872017	295886973	10	14956
Sikem	PacBio HiFi + Hi-C	Chr2	Small	63199417	63214324	3	14907
Sikem	PacBio HiFi + Hi-C	Chr6	Small	30083563	30098464	5	14901
Sikem	PacBio HiFi + Hi-C	Chr4	Small	380643214	380658074	4	14860
Sikem	PacBio HiFi + Hi-C	Chr7	Small	146974566	146989378	5	14812
Sikem	PacBio HiFi + Hi-C	Chr1	Small	106430993	106445783	11	14790
Sikem	PacBio HiFi + Hi-C	Chr7	Small	256616824	256631607	21	14783
Sikem	PacBio HiFi + Hi-C	Chr7	Small	281059096	281073871	6	14775
Sikem	PacBio HiFi + Hi-C	Chr4	Small	48174231	48189005	13	14774
Sikem	PacBio HiFi + Hi-C	Chr3	Small	58927050	58941763	5	14713
Sikem	PacBio HiFi + Hi-C	Chr6	Small	100029832	100044527	2	14695
Sikem	PacBio HiFi + Hi-C	Chr3	Small	30527685	30542349	5	14664
Sikem	PacBio HiFi + Hi-C	Chr7	Small	321975499	321990138	8	14639
Sikem	PacBio HiFi + Hi-C	Chr4	Small	292287986	292302613	2	14627
Sikem	PacBio HiFi + Hi-C	Chr6	Small	159043021	159057648	7	14627
Sikem	PacBio HiFi + Hi-C	Chr1	Small	144505807	144520430	2	14623
Sikem	PacBio HiFi + Hi-C	Chr2	Small	228428062	228442667	2	14605
Sikem	PacBio HiFi + Hi-C	Chr5	Small	88492331	88506913	8	14582
Sikem	PacBio HiFi + Hi-C	Chr5	Small	87490304	87504877	8	14573
Sikem	PacBio HiFi + Hi-C	Chr4	Small	424097842	424112384	2	14542
Sikem	PacBio HiFi + Hi-C	Chr7	Small	62481352	62495864	4	14512
Sikem	PacBio HiFi + Hi-C	Chr3	Small	372646741	372661207	2	14466
Sikem	PacBio HiFi + Hi-C	Chr3	Small	378818407	378832864	3	14457
Sikem	PacBio HiFi + Hi-C	Chr3	Small	42607441	42621894	6	14453
Sikem	PacBio HiFi + Hi-C	Chr7	Small	241184350	241198793	2	14443
Sikem	PacBio HiFi + Hi-C	Chr5	Small	207714696	207729134	8	14438
Sikem	PacBio HiFi + Hi-C	Chr5	Small	68990170	69004588	34	14418
Sikem	PacBio HiFi + Hi-C	Chr5	Small	4851971	4866372	3	14401
Sikem	PacBio HiFi + Hi-C	Chr3	Small	148776424	148790749	8	14325
Sikem	PacBio HiFi + Hi-C	Chr5	Small	187907182	187921476	6	14294
Sikem	PacBio HiFi + Hi-C	Chr2	Small	37717624	37731905	10	14281
Sikem	PacBio HiFi + Hi-C	Chr6	Small	124969225	124983488	3	14263
Sikem	PacBio HiFi + Hi-C	Chr7	Small	355833968	355848229	10	14261
Sikem	PacBio HiFi + Hi-C	Chr7	Small	89349597	89363838	6	14241
Sikem	PacBio HiFi + Hi-C	Chr3	Small	151561331	151575548	6	14217
Sikem	PacBio HiFi + Hi-C	Chr4	Small	418981321	418995509	32	14188
Sikem	PacBio HiFi + Hi-C	Chr5	Small	86030093	86044276	14	14183
Sikem	PacBio HiFi + Hi-C	Chr4	Small	29278169	29292344	6	14175
Sikem	PacBio HiFi + Hi-C	Chr7	Small	90180433	90194598	3	14165
Sikem	PacBio HiFi + Hi-C	Chr1	Small	115370548	115384707	2	14159
Sikem	PacBio HiFi + Hi-C	Chr3	Small	127488947	127503088	5	14141
Sikem	PacBio HiFi + Hi-C	Chr5	Small	105313277	105327405	15	14128
Sikem	PacBio HiFi + Hi-C	Chr2	Small	296870746	296884836	3	14090
Sikem	PacBio HiFi + Hi-C	Chr7	Small	57897129	57911164	3	14035
Sikem	PacBio HiFi + Hi-C	Chr4	Small	258212265	258226252	5	13987
Sikem	PacBio HiFi + Hi-C	Chr4	Small	11511516	11525502	2	13986
Sikem	PacBio HiFi + Hi-C	Chr1	Small	125197275	125211202	9	13927
Sikem	PacBio HiFi + Hi-C	Chr6	Small	74447795	74461679	3	13884
Sikem	PacBio HiFi + Hi-C	Chr3	Small	94514968	94528832	5	13864
Sikem	PacBio HiFi + Hi-C	Chr2	Small	72084701	72098552	26	13851
Sikem	PacBio HiFi + Hi-C	Chr3	Small	56156188	56170038	20	13850
Sikem	PacBio HiFi + Hi-C	Chr1	Small	220391035	220404882	7	13847
Sikem	PacBio HiFi + Hi-C	Chr3	Small	92413999	92427826	4	13827
Sikem	PacBio HiFi + Hi-C	Chr6	Small	41640327	41654137	7	13810
Sikem	PacBio HiFi + Hi-C	Chr3	Small	272526510	272540279	2	13769
Sikem	PacBio HiFi + Hi-C	Chr7	Small	71617608	71631359	35	13751
Sikem	PacBio HiFi + Hi-C	Chr3	Small	330331224	330344938	3	13714
Sikem	PacBio HiFi + Hi-C	Chr4	Small	290326038	290339726	2	13688
Sikem	PacBio HiFi + Hi-C	Chr5	Small	151919094	151932762	3	13668
Sikem	PacBio HiFi + Hi-C	Chr3	Small	160986143	160999762	5	13619
Sikem	PacBio HiFi + Hi-C	Chr1	Small	254896500	254910061	4	13561
Sikem	PacBio HiFi + Hi-C	Chr3	Small	314384627	314398118	4	13491
Sikem	PacBio HiFi + Hi-C	Chr2	Small	64177406	64190892	3	13486
Sikem	PacBio HiFi + Hi-C	Chr2	Small	165381825	165395255	2	13430
Sikem	PacBio HiFi + Hi-C	Chr4	Small	353502910	353516330	3	13420
Sikem	PacBio HiFi + Hi-C	Chr4	Small	143578896	143592282	17	13386
Sikem	PacBio HiFi + Hi-C	Chr6	Small	142234469	142247853	16	13384
Sikem	PacBio HiFi + Hi-C	Chr5	Small	142472549	142485869	19	13320
Sikem	PacBio HiFi + Hi-C	Chr5	Small	96075799	96089110	4	13311
Sikem	PacBio HiFi + Hi-C	Chr4	Small	420589547	420602841	6	13294
Sikem	PacBio HiFi + Hi-C	Chr4	Small	186832945	186846201	12	13256
Sikem	PacBio HiFi + Hi-C	Chr5	Small	8430751	8444002	21	13251
Sikem	PacBio HiFi + Hi-C	Chr1	Small	7554648	7567898	9	13250
Sikem	PacBio HiFi + Hi-C	Chr5	Small	54381195	54394418	2	13223
Sikem	PacBio HiFi + Hi-C	Chr5	Small	83098272	83111460	3	13188
Sikem	PacBio HiFi + Hi-C	Chr7	Small	170557056	170570219	7	13163
Sikem	PacBio HiFi + Hi-C	Chr6	Small	122149631	122162714	8	13083
Sikem	PacBio HiFi + Hi-C	Chr6	Small	158007154	158020201	4	13047
Sikem	PacBio HiFi + Hi-C	Chr1	Small	172011245	172024269	3	13024
Sikem	PacBio HiFi + Hi-C	Chr6	Small	17411464	17424485	33	13021
Sikem	PacBio HiFi + Hi-C	Chr3	Small	357106731	357119745	2	13014
Sikem	PacBio HiFi + Hi-C	Chr2	Small	77829592	77842603	9	13011
Sikem	PacBio HiFi + Hi-C	Chr4	Small	375116435	375129435	35	13000
Sikem	PacBio HiFi + Hi-C	Chr5	Small	68166204	68179195	31	12991
Sikem	PacBio HiFi + Hi-C	Chr5	Small	105368532	105381514	3	12982
Sikem	PacBio HiFi + Hi-C	Chr4	Small	13539251	13552222	7	12971
Sikem	PacBio HiFi + Hi-C	Chr6	Small	146177774	146190735	8	12961
Sikem	PacBio HiFi + Hi-C	Chr1	Small	155295739	155308694	18	12955
Sikem	PacBio HiFi + Hi-C	Chr1	Small	250971941	250984875	5	12934
Sikem	PacBio HiFi + Hi-C	Chr7	Small	23004779	23017701	3	12922
Sikem	PacBio HiFi + Hi-C	Chr3	Small	40681285	40694204	12	12919
Sikem	PacBio HiFi + Hi-C	Chr1	Small	142633468	142646346	73	12878
Sikem	PacBio HiFi + Hi-C	Chr3	Small	119550547	119563425	18	12878
Sikem	PacBio HiFi + Hi-C	Chr1	Small	166057727	166070602	3	12875
Sikem	PacBio HiFi + Hi-C	Chr4	Small	408052129	408065002	4	12873
Sikem	PacBio HiFi + Hi-C	Chr1	Small	78294633	78307469	9	12836
Sikem	PacBio HiFi + Hi-C	Chr3	Small	1826016	1838842	37	12826
Sikem	PacBio HiFi + Hi-C	Chr5	Small	136921732	136934544	6	12812
Sikem	PacBio HiFi + Hi-C	Chr4	Small	281526604	281539406	11	12802
Sikem	PacBio HiFi + Hi-C	Chr2	Small	164439108	164451909	5	12801
Sikem	PacBio HiFi + Hi-C	Chr3	Small	196531058	196543852	9	12794
Sikem	PacBio HiFi + Hi-C	Chr5	Small	165230598	165243390	2	12792
Sikem	PacBio HiFi + Hi-C	Chr3	Small	85585143	85597925	12	12782
Sikem	PacBio HiFi + Hi-C	Chr1	Small	42496628	42509387	6	12759
Sikem	PacBio HiFi + Hi-C	Chr3	Small	245363973	245376726	15	12753
Sikem	PacBio HiFi + Hi-C	Chr4	Small	98179480	98192232	5	12752
Sikem	PacBio HiFi + Hi-C	Chr5	Small	40523467	40536218	4	12751
Sikem	PacBio HiFi + Hi-C	Chr7	Small	265669787	265682485	4	12698
Sikem	PacBio HiFi + Hi-C	Chr1	Small	218311287	218323978	4	12691
Sikem	PacBio HiFi + Hi-C	Chr7	Small	107226862	107239553	5	12691
Sikem	PacBio HiFi + Hi-C	Chr5	Small	58925152	58937826	5	12674
Sikem	PacBio HiFi + Hi-C	Chr6	Small	27208073	27220739	14	12666
Sikem	PacBio HiFi + Hi-C	Chr7	Small	265503021	265515681	28	12660
Sikem	PacBio HiFi + Hi-C	Chr3	Small	146819982	146832575	5	12593
Sikem	PacBio HiFi + Hi-C	Chr4	Small	134115831	134128401	7	12570
Sikem	PacBio HiFi + Hi-C	Chr3	Small	132515967	132528534	2	12567
Sikem	PacBio HiFi + Hi-C	Chr7	Small	192543773	192556298	3	12525
Sikem	PacBio HiFi + Hi-C	Chr2	Small	149315866	149328386	4	12520
Sikem	PacBio HiFi + Hi-C	Chr2	Small	201543958	201556432	4	12474
Sikem	PacBio HiFi + Hi-C	Chr3	Small	100820507	100832972	9	12465
Sikem	PacBio HiFi + Hi-C	Chr3	Small	150018339	150030788	48	12449
Sikem	PacBio HiFi + Hi-C	Chr7	Small	327429108	327441552	7	12444
Sikem	PacBio HiFi + Hi-C	Chr7	Small	224004039	224016479	25	12440
Sikem	PacBio HiFi + Hi-C	Chr5	Small	51585228	51597661	7	12433
Sikem	PacBio HiFi + Hi-C	Chr6	Small	127756439	127768854	7	12415
Sikem	PacBio HiFi + Hi-C	Chr5	Small	189349849	189362240	10	12391
Sikem	PacBio HiFi + Hi-C	Chr5	Small	12370737	12383127	5	12390
Sikem	PacBio HiFi + Hi-C	Chr7	Small	333529020	333541377	3	12357
Sikem	PacBio HiFi + Hi-C	Chr7	Small	56519107	56531432	12	12325
Sikem	PacBio HiFi + Hi-C	Chr5	Small	94194402	94206673	2	12271
Sikem	PacBio HiFi + Hi-C	Chr1	Small	119323793	119336032	6	12239
Sikem	PacBio HiFi + Hi-C	Chr7	Small	157328298	157340408	8	12110
Sikem	PacBio HiFi + Hi-C	Chr5	Small	46084732	46096839	60	12107
Sikem	PacBio HiFi + Hi-C	Chr4	Small	186146717	186158819	4	12102
Sikem	PacBio HiFi + Hi-C	Chr6	Small	169101008	169113103	8	12095
Sikem	PacBio HiFi + Hi-C	Chr7	Small	81321801	81333895	16	12094
Sikem	PacBio HiFi + Hi-C	Chr5	Small	49969808	49981901	2	12093
Sikem	PacBio HiFi + Hi-C	Chr6	Small	236620477	236632551	4	12074
Sikem	PacBio HiFi + Hi-C	Chr4	Small	279739605	279751673	4	12068
Sikem	PacBio HiFi + Hi-C	Chr5	Small	62284619	62296675	3	12056
Sikem	PacBio HiFi + Hi-C	Chr2	Small	110549544	110561585	5	12041
Sikem	PacBio HiFi + Hi-C	Chr6	Small	32181788	32193819	6	12031
Sikem	PacBio HiFi + Hi-C	Chr5	Small	62865551	62877562	2	12011
Sikem	PacBio HiFi + Hi-C	Chr2	Small	182041099	182053091	4	11992
Sikem	PacBio HiFi + Hi-C	Chr5	Small	168518124	168530064	6	11940
Sikem	PacBio HiFi + Hi-C	Chr7	Small	101276172	101288089	30	11917
Sikem	PacBio HiFi + Hi-C	Chr2	Small	98906940	98918844	26	11904
Sikem	PacBio HiFi + Hi-C	Chr5	Small	88629115	88641018	2	11903
Sikem	PacBio HiFi + Hi-C	Chr5	Small	65843997	65855891	4	11894
Sikem	PacBio HiFi + Hi-C	Chr6	Small	20858647	20870539	4	11892
Sikem	PacBio HiFi + Hi-C	Chr6	Small	214792105	214803988	10	11883
Sikem	PacBio HiFi + Hi-C	Chr1	Small	260814186	260825982	23	11796
Sikem	PacBio HiFi + Hi-C	Chr5	Small	56427693	56439471	13	11778
Sikem	PacBio HiFi + Hi-C	Chr5	Small	106607996	106619742	10	11746
Sikem	PacBio HiFi + Hi-C	Chr1	Small	80668547	80680268	2	11721
Sikem	PacBio HiFi + Hi-C	Chr2	Small	234247251	234258956	5	11705
Sikem	PacBio HiFi + Hi-C	Chr4	Small	17830168	17841861	13	11693
Sikem	PacBio HiFi + Hi-C	Chr6	Small	161328838	161340520	7	11682
Sikem	PacBio HiFi + Hi-C	Chr3	Small	192242818	192254490	31	11672
Sikem	PacBio HiFi + Hi-C	Chr3	Small	356375715	356387360	6	11645
Sikem	PacBio HiFi + Hi-C	Chr3	Small	91147137	91158754	3	11617
Sikem	PacBio HiFi + Hi-C	Chr3	Small	390317244	390328855	8	11611
Sikem	PacBio HiFi + Hi-C	Chr4	Small	150597818	150609423	4	11605
Sikem	PacBio HiFi + Hi-C	Chr1	Small	131620184	131631785	28	11601
Sikem	PacBio HiFi + Hi-C	Chr1	Small	220569119	220580712	22	11593
Sikem	PacBio HiFi + Hi-C	Chr7	Small	136704692	136716282	8	11590
Sikem	PacBio HiFi + Hi-C	Chr3	Small	389563574	389575157	8	11583
Sikem	PacBio HiFi + Hi-C	Chr3	Small	52992669	53004227	19	11558
Sikem	PacBio HiFi + Hi-C	Chr3	Small	28260014	28271553	7	11539
Sikem	PacBio HiFi + Hi-C	Chr5	Small	119840741	119852260	4	11519
Sikem	PacBio HiFi + Hi-C	Chr4	Small	337062410	337073926	6	11516
Sikem	PacBio HiFi + Hi-C	Chr7	Small	263811043	263822553	10	11510
Sikem	PacBio HiFi + Hi-C	Chr7	Small	187621870	187633352	3	11482
Sikem	PacBio HiFi + Hi-C	Chr4	Small	426601603	426613036	2	11433
Sikem	PacBio HiFi + Hi-C	Chr3	Small	286893253	286904677	5	11424
Sikem	PacBio HiFi + Hi-C	Chr5	Small	96935222	96946644	2	11422
Sikem	PacBio HiFi + Hi-C	Chr4	Small	270157757	270169155	6	11398
Sikem	PacBio HiFi + Hi-C	Chr5	Small	24297629	24309021	2	11392
Sikem	PacBio HiFi + Hi-C	Chr4	Small	322893824	322905195	2	11371
Sikem	PacBio HiFi + Hi-C	Chr2	Small	117564675	117576036	5	11361
Sikem	PacBio HiFi + Hi-C	Chr6	Small	64533517	64544876	5	11359
Sikem	PacBio HiFi + Hi-C	Chr1	Small	172538230	172549558	4	11328
Sikem	PacBio HiFi + Hi-C	Chr7	Small	111432662	111443978	9	11316
Sikem	PacBio HiFi + Hi-C	Chr7	Small	211031047	211042361	2	11314
Sikem	PacBio HiFi + Hi-C	Chr5	Small	142865306	142876586	17	11280
Sikem	PacBio HiFi + Hi-C	Chr4	Small	391330474	391341752	8	11278
Sikem	PacBio HiFi + Hi-C	Chr6	Small	205739687	205750964	5	11277
Sikem	PacBio HiFi + Hi-C	Chr3	Small	133860735	133872003	6	11268
Sikem	PacBio HiFi + Hi-C	Chr7	Small	72860535	72871781	5	11246
Sikem	PacBio HiFi + Hi-C	Chr7	Small	229014433	229025662	3	11229
Sikem	PacBio HiFi + Hi-C	Chr7	Small	338867668	338878897	2	11229
Sikem	PacBio HiFi + Hi-C	Chr5	Small	94309320	94320514	3	11194
Sikem	PacBio HiFi + Hi-C	Chr5	Small	96444628	96455801	2	11173
Sikem	PacBio HiFi + Hi-C	Chr7	Small	268990297	269001465	10	11168
Sikem	PacBio HiFi + Hi-C	Chr1	Small	144020600	144031743	5	11143
Sikem	PacBio HiFi + Hi-C	Chr3	Small	5845548	5856677	9	11129
Sikem	PacBio HiFi + Hi-C	Chr4	Small	203304643	203315760	4	11117
Sikem	PacBio HiFi + Hi-C	Chr3	Small	199732507	199743615	3	11108
Sikem	PacBio HiFi + Hi-C	Chr6	Small	131095279	131106386	6	11107
Sikem	PacBio HiFi + Hi-C	Chr7	Small	3108056	3119157	7	11101
Sikem	PacBio HiFi + Hi-C	Chr5	Small	109420523	109431600	13	11077
Sikem	PacBio HiFi + Hi-C	Chr4	Small	210550035	210561093	10	11058
Sikem	PacBio HiFi + Hi-C	Chr3	Small	148836966	148848014	2	11048
Sikem	PacBio HiFi + Hi-C	Chr3	Small	257228587	257239630	3	11043
Sikem	PacBio HiFi + Hi-C	Chr4	Small	91284020	91295048	4	11028
Sikem	PacBio HiFi + Hi-C	Chr7	Small	112384765	112395776	5	11011
Sikem	PacBio HiFi + Hi-C	Chr6	Small	15827275	15838263	9	10988
Sikem	PacBio HiFi + Hi-C	Chr2	Small	165120971	165131948	5	10977
Sikem	PacBio HiFi + Hi-C	Chr6	Small	146079176	146090144	7	10968
Sikem	PacBio HiFi + Hi-C	Chr5	Small	193249192	193260142	10	10950
Sikem	PacBio HiFi + Hi-C	Chr7	Small	89514580	89525529	17	10949
Sikem	PacBio HiFi + Hi-C	Chr1	Small	25324488	25335404	13	10916
Sikem	PacBio HiFi + Hi-C	Chr5	Small	77452103	77463016	8	10913
Sikem	PacBio HiFi + Hi-C	Chr7	Small	351656405	351667295	15	10890
Sikem	PacBio HiFi + Hi-C	Chr6	Small	145277569	145288431	8	10862
Sikem	PacBio HiFi + Hi-C	Chr7	Small	121852940	121863802	14	10862
Sikem	PacBio HiFi + Hi-C	Chr7	Small	171897561	171908403	5	10842
Sikem	PacBio HiFi + Hi-C	Chr1	Small	31426188	31437021	18	10833
Sikem	PacBio HiFi + Hi-C	Chr3	Small	4311267	4322086	7	10819
Sikem	PacBio HiFi + Hi-C	Chr3	Small	1624045	1634849	9	10804
Sikem	PacBio HiFi + Hi-C	Chr7	Small	265951821	265962616	7	10795
Sikem	PacBio HiFi + Hi-C	Chr4	Small	36928049	36938837	4	10788
Sikem	PacBio HiFi + Hi-C	Chr3	Small	130667700	130678485	7	10785
Sikem	PacBio HiFi + Hi-C	Chr6	Small	30647418	30658201	7	10783
Sikem	PacBio HiFi + Hi-C	Chr6	Small	237814498	237825253	13	10755
Sikem	PacBio HiFi + Hi-C	Chr4	Small	54049794	54060512	2	10718
Sikem	PacBio HiFi + Hi-C	Chr6	Small	116903058	116913776	6	10718
Sikem	PacBio HiFi + Hi-C	Chr5	Small	67033211	67043928	2	10717
Sikem	PacBio HiFi + Hi-C	Chr2	Small	159330227	159340939	5	10712
Sikem	PacBio HiFi + Hi-C	Chr5	Small	33911815	33922521	6	10706
Sikem	PacBio HiFi + Hi-C	Chr5	Small	2774206	2784904	2	10698
Sikem	PacBio HiFi + Hi-C	Chr5	Small	105048554	105059233	5	10679
Sikem	PacBio HiFi + Hi-C	Chr2	Small	64874407	64885084	8	10677
Sikem	PacBio HiFi + Hi-C	Chr3	Small	90168427	90179082	8	10655
Sikem	PacBio HiFi + Hi-C	Chr5	Small	152818568	152829213	7	10645
Sikem	PacBio HiFi + Hi-C	Chr4	Small	185241063	185251673	14	10610
Sikem	PacBio HiFi + Hi-C	Chr3	Small	216423538	216434141	6	10603
Sikem	PacBio HiFi + Hi-C	Chr3	Small	333649679	333660250	2	10571
Sikem	PacBio HiFi + Hi-C	Chr7	Small	273937164	273947735	18	10571
Sikem	PacBio HiFi + Hi-C	Chr1	Small	103355912	103366480	4	10568
Sikem	PacBio HiFi + Hi-C	Chr3	Small	130580186	130590753	3	10567
Sikem	PacBio HiFi + Hi-C	Chr2	Small	89387773	89398306	5	10533
Sikem	PacBio HiFi + Hi-C	Chr5	Small	73814431	73824931	5	10500
Sikem	PacBio HiFi + Hi-C	Chr3	Small	35921346	35931839	18	10493
Sikem	PacBio HiFi + Hi-C	Chr4	Small	17926938	17937394	19	10456
Sikem	PacBio HiFi + Hi-C	Chr3	Small	128091183	128101638	12	10455
Sikem	PacBio HiFi + Hi-C	Chr4	Small	241616233	241626660	11	10427
Sikem	PacBio HiFi + Hi-C	Chr4	Small	181564668	181575080	7	10412
Sikem	PacBio HiFi + Hi-C	Chr2	Small	79994323	80004731	5	10408
Sikem	PacBio HiFi + Hi-C	Chr4	Small	35686033	35696427	3	10394
Sikem	PacBio HiFi + Hi-C	Chr2	Small	10448928	10459299	5	10371
Sikem	PacBio HiFi + Hi-C	Chr2	Small	285201502	285211870	5	10368
Sikem	PacBio HiFi + Hi-C	Chr4	Small	109556239	109566593	2	10354
Sikem	PacBio HiFi + Hi-C	Chr3	Small	146120682	146131001	2	10319
Sikem	PacBio HiFi + Hi-C	Chr2	Small	95657545	95667848	5	10303
Sikem	PacBio HiFi + Hi-C	Chr5	Small	9042519	9052813	27	10294
Sikem	PacBio HiFi + Hi-C	Chr4	Small	307553623	307563877	5	10254
Sikem	PacBio HiFi + Hi-C	Chr6	Small	254293892	254304129	20	10237
Sikem	PacBio HiFi + Hi-C	Chr6	Small	61223370	61233598	26	10228
Sikem	PacBio HiFi + Hi-C	Chr7	Small	178416282	178426443	4	10161
Sikem	PacBio HiFi + Hi-C	Chr2	Small	113732927	113743082	13	10155
Sikem	PacBio HiFi + Hi-C	Chr4	Small	220503395	220513471	3	10076
Sikem	PacBio HiFi + Hi-C	Chr4	Small	276652888	276662942	2	10054
Sikem	PacBio HiFi + Hi-C	Chr3	Small	239614727	239624754	3	10027
Sikem	PacBio HiFi + Hi-C	Chr6	Small	123061423	123071407	7	9984
Sikem	PacBio HiFi + Hi-C	Chr5	Small	68415954	68425932	3	9978
Sikem	PacBio HiFi + Hi-C	Chr6	Small	129327495	129337470	6	9975
Sikem	PacBio HiFi + Hi-C	Chr1	Small	7077087	7086994	3	9907
Sikem	PacBio HiFi + Hi-C	Chr4	Small	208031225	208041121	3	9896
Sikem	PacBio HiFi + Hi-C	Chr6	Small	87792688	87802541	19	9853
Sikem	PacBio HiFi + Hi-C	Chr3	Small	25254275	25264119	6	9844
Sikem	PacBio HiFi + Hi-C	Chr2	Small	145442764	145452557	2	9793
Sikem	PacBio HiFi + Hi-C	Chr4	Small	326444100	326453880	3	9780
Sikem	PacBio HiFi + Hi-C	Chr4	Small	237678322	237688096	2	9774
Sikem	PacBio HiFi + Hi-C	Chr4	Small	261080940	261090695	9	9755
Sikem	PacBio HiFi + Hi-C	Chr2	Small	174701745	174711476	22	9731
Sikem	PacBio HiFi + Hi-C	Chr6	Small	119055665	119065374	6	9709
Sikem	PacBio HiFi + Hi-C	Chr5	Small	88841042	88850746	17	9704
Sikem	PacBio HiFi + Hi-C	Chr5	Small	235464587	235474274	28	9687
Sikem	PacBio HiFi + Hi-C	Chr6	Small	230682985	230692653	10	9668
Sikem	PacBio HiFi + Hi-C	Chr1	Small	63957181	63966842	2	9661
Sikem	PacBio HiFi + Hi-C	Chr3	Small	18970569	18980209	7	9640
Sikem	PacBio HiFi + Hi-C	Chr5	Small	70224645	70234281	11	9636
Sikem	PacBio HiFi + Hi-C	Chr3	Small	65051651	65061277	29	9626
Sikem	PacBio HiFi + Hi-C	Chr4	Small	260916013	260925592	6	9579
Sikem	PacBio HiFi + Hi-C	Chr7	Small	122766449	122775970	3	9521
Sikem	PacBio HiFi + Hi-C	Chr7	Small	41990685	42000189	4	9504
Sikem	PacBio HiFi + Hi-C	Chr6	Small	91376722	91386196	3	9474
Sikem	PacBio HiFi + Hi-C	Chr4	Small	235802625	235812037	8	9412
Sikem	PacBio HiFi + Hi-C	Chr3	Small	24910829	24920130	10	9301
Sikem	PacBio HiFi + Hi-C	Chr1	Small	249895326	249904600	3	9274
Sikem	PacBio HiFi + Hi-C	Chr3	Small	43608054	43617320	12	9266
Sikem	PacBio HiFi + Hi-C	Chr2	Small	65422416	65431634	5	9218
Sikem	PacBio HiFi + Hi-C	Chr6	Small	46420971	46430187	6	9216
Sikem	PacBio HiFi + Hi-C	Chr3	Small	140565361	140574568	2	9207
Sikem	PacBio HiFi + Hi-C	Chr4	Small	413987734	413996898	3	9164
Sikem	PacBio HiFi + Hi-C	Chr7	Small	297017002	297026135	3	9133
Sikem	PacBio HiFi + Hi-C	Chr7	Small	42730445	42739545	19	9100
Sikem	PacBio HiFi + Hi-C	Chr1	Small	18985385	18994458	7	9073
Sikem	PacBio HiFi + Hi-C	Chr4	Small	17073263	17082304	11	9041
Sikem	PacBio HiFi + Hi-C	Chr1	Small	157313355	157322347	2	8992
Sikem	PacBio HiFi + Hi-C	Chr1	Small	219169270	219178236	15	8966
Sikem	PacBio HiFi + Hi-C	Chr1	Small	42601052	42609973	23	8921
Sikem	PacBio HiFi + Hi-C	Chr3	Small	327850317	327859237	2	8920
Sikem	PacBio HiFi + Hi-C	Chr2	Small	301563702	301572587	9	8885
Sikem	PacBio HiFi + Hi-C	Chr3	Small	172486	181359	17	8873
Sikem	PacBio HiFi + Hi-C	Chr7	Small	138004797	138013670	13	8873
Sikem	PacBio HiFi + Hi-C	Chr4	Small	411388847	411397706	6	8859
Sikem	PacBio HiFi + Hi-C	Chr5	Small	51628774	51637632	9	8858
Sikem	PacBio HiFi + Hi-C	Chr7	Small	152636404	152645259	4	8855
Sikem	PacBio HiFi + Hi-C	Chr4	Small	83518547	83527394	2	8847
Sikem	PacBio HiFi + Hi-C	Chr5	Small	160812018	160820850	14	8832
Sikem	PacBio HiFi + Hi-C	Chr7	Small	22325900	22334693	6	8793
Sikem	PacBio HiFi + Hi-C	Chr3	Small	99971199	99979973	20	8774
Sikem	PacBio HiFi + Hi-C	Chr4	Small	296076764	296085519	9	8755
Sikem	PacBio HiFi + Hi-C	Chr4	Small	31283504	31292239	2	8735
Sikem	PacBio HiFi + Hi-C	Chr4	Small	105907361	105916081	2	8720
Sikem	PacBio HiFi + Hi-C	Chr6	Small	155120427	155129078	6	8651
Sikem	PacBio HiFi + Hi-C	Chr4	Small	107220383	107229031	3	8648
Sikem	PacBio HiFi + Hi-C	Chr2	Small	119416461	119425104	4	8643
Sikem	PacBio HiFi + Hi-C	Chr7	Small	330428614	330437245	3	8631
Sikem	PacBio HiFi + Hi-C	Chr3	Small	190053401	190062019	3	8618
Sikem	PacBio HiFi + Hi-C	Chr7	Small	112892178	112900792	7	8614
Sikem	PacBio HiFi + Hi-C	Chr7	Small	282619800	282628391	36	8591
Sikem	PacBio HiFi + Hi-C	Chr6	Small	125007025	125015567	4	8542
Sikem	PacBio HiFi + Hi-C	Chr1	Small	105496035	105504555	4	8520
Sikem	PacBio HiFi + Hi-C	Chr4	Small	418450247	418458760	5	8513
Sikem	PacBio HiFi + Hi-C	Chr4	Small	253705661	253714159	6	8498
Sikem	PacBio HiFi + Hi-C	Chr3	Small	119442954	119451423	3	8469
Sikem	PacBio HiFi + Hi-C	Chr4	Small	338864069	338872533	8	8464
Sikem	PacBio HiFi + Hi-C	Chr7	Small	288729720	288738164	10	8444
Sikem	PacBio HiFi + Hi-C	Chr5	Small	37858958	37867386	7	8428
Sikem	PacBio HiFi + Hi-C	Chr3	Small	233170932	233179349	2	8417
Sikem	PacBio HiFi + Hi-C	Chr4	Small	59009149	59017557	3	8408
Sikem	PacBio HiFi + Hi-C	Chr5	Small	184531094	184539498	4	8404
Sikem	PacBio HiFi + Hi-C	Chr6	Small	130654935	130663336	3	8401
Sikem	PacBio HiFi + Hi-C	Chr1	Small	220724773	220733168	14	8395
Sikem	PacBio HiFi + Hi-C	Chr3	Small	41481457	41489841	129	8384
Sikem	PacBio HiFi + Hi-C	Chr4	Small	27262016	27270393	5	8377
Sikem	PacBio HiFi + Hi-C	Chr7	Small	244915599	244923947	3	8348
Sikem	PacBio HiFi + Hi-C	Chr2	Small	228040005	228048342	20	8337
Sikem	PacBio HiFi + Hi-C	Chr7	Small	58401067	58409399	2	8332
Sikem	PacBio HiFi + Hi-C	Chr1	Small	217234764	217243087	33	8323
Sikem	PacBio HiFi + Hi-C	Chr3	Small	175507247	175515570	5	8323
Sikem	PacBio HiFi + Hi-C	Chr4	Small	321986201	321994491	7	8290
Sikem	PacBio HiFi + Hi-C	Chr7	Small	123552276	123560548	2	8272
Sikem	PacBio HiFi + Hi-C	Chr7	Small	349955243	349963507	11	8264
Sikem	PacBio HiFi + Hi-C	Chr1	Small	149101306	149109563	3	8257
Sikem	PacBio HiFi + Hi-C	Chr2	Small	211728680	211736934	21	8254
Sikem	PacBio HiFi + Hi-C	Chr1	Small	165534491	165542739	3	8248
Sikem	PacBio HiFi + Hi-C	Chr3	Small	364761028	364769267	26	8239
Sikem	PacBio HiFi + Hi-C	Chr3	Small	4484730	4492953	12	8223
Sikem	PacBio HiFi + Hi-C	Chr1	Small	248227355	248235547	2	8192
Sikem	PacBio HiFi + Hi-C	Chr2	Small	163894457	163902611	9	8154
Sikem	PacBio HiFi + Hi-C	Chr1	Small	32566958	32575072	7	8114
Sikem	PacBio HiFi + Hi-C	Chr6	Small	84965812	84973924	3	8112
Sikem	PacBio HiFi + Hi-C	Chr4	Small	86054198	86062296	4	8098
Sikem	PacBio HiFi + Hi-C	Chr7	Small	235073757	235081851	14	8094
Sikem	PacBio HiFi + Hi-C	Chr3	Small	24009266	24017326	22	8060
Sikem	PacBio HiFi + Hi-C	Chr1	Small	156380365	156388410	11	8045
Sikem	PacBio HiFi + Hi-C	Chr4	Small	427689666	427697688	2	8022
Sikem	PacBio HiFi + Hi-C	Chr1	Small	224129673	224137692	14	8019
Sikem	PacBio HiFi + Hi-C	Chr5	Small	95824334	95832353	2	8019
Sikem	PacBio HiFi + Hi-C	Chr3	Small	36081732	36089741	29	8009
Sikem	PacBio HiFi + Hi-C	Chr4	Small	197322934	197330929	9	7995
Sikem	PacBio HiFi + Hi-C	Chr2	Small	137577033	137585006	2	7973
Sikem	PacBio HiFi + Hi-C	Chr3	Small	85713196	85721169	2	7973
Sikem	PacBio HiFi + Hi-C	Chr6	Small	19604084	19612025	6	7941
Sikem	PacBio HiFi + Hi-C	Chr7	Small	59281945	59289877	9	7932
Sikem	PacBio HiFi + Hi-C	Chr7	Small	364334240	364342167	10	7927
Sikem	PacBio HiFi + Hi-C	Chr5	Small	156247647	156255570	5	7923
Sikem	PacBio HiFi + Hi-C	Chr3	Small	339818883	339826753	5	7870
Sikem	PacBio HiFi + Hi-C	Chr4	Small	205019037	205026883	16	7846
Sikem	PacBio HiFi + Hi-C	Chr1	Small	79192595	79200417	15	7822
Sikem	PacBio HiFi + Hi-C	Chr1	Small	262674370	262682184	5	7814
Sikem	PacBio HiFi + Hi-C	Chr3	Small	373844606	373852407	14	7801
Sikem	PacBio HiFi + Hi-C	Chr6	Small	119224593	119232392	8	7799
Sikem	PacBio HiFi + Hi-C	Chr5	Small	81752149	81759929	2	7780
Sikem	PacBio HiFi + Hi-C	Chr3	Small	331102554	331110318	23	7764
Sikem	PacBio HiFi + Hi-C	Chr6	Small	22676859	22684618	8	7759
Sikem	PacBio HiFi + Hi-C	Chr6	Small	177443924	177451679	2	7755
Sikem	PacBio HiFi + Hi-C	Chr3	Small	4284685	4292424	5	7739
Sikem	PacBio HiFi + Hi-C	Chr7	Small	151811392	151819131	10	7739
Sikem	PacBio HiFi + Hi-C	Chr2	Small	183547659	183555394	17	7735
Sikem	PacBio HiFi + Hi-C	Chr2	Small	171782115	171789843	4	7728
Sikem	PacBio HiFi + Hi-C	Chr1	Small	191334664	191342390	4	7726
Sikem	PacBio HiFi + Hi-C	Chr6	Small	210499246	210506947	2	7701
Sikem	PacBio HiFi + Hi-C	Chr7	Small	117518018	117525676	12	7658
Sikem	PacBio HiFi + Hi-C	Chr3	Small	88908870	88916517	8	7647
Sikem	PacBio HiFi + Hi-C	Chr7	Small	145114605	145122251	7	7646
Sikem	PacBio HiFi + Hi-C	Chr2	Small	182561527	182569165	6	7638
Sikem	PacBio HiFi + Hi-C	Chr7	Small	268775596	268783211	3	7615
Sikem	PacBio HiFi + Hi-C	Chr2	Small	242699455	242707057	4	7602
Sikem	PacBio HiFi + Hi-C	Chr5	Small	65908109	65915707	12	7598
Sikem	PacBio HiFi + Hi-C	Chr7	Small	171480429	171488016	12	7587
Sikem	PacBio HiFi + Hi-C	Chr1	Small	106837847	106845427	3	7580
Sikem	PacBio HiFi + Hi-C	Chr1	Small	247948587	247956154	2	7567
Sikem	PacBio HiFi + Hi-C	Chr3	Small	153077303	153084808	9	7505
Sikem	PacBio HiFi + Hi-C	Chr1	Small	105112666	105120167	3	7501
Sikem	PacBio HiFi + Hi-C	Chr5	Small	4808654	4816142	3	7488
Sikem	PacBio HiFi + Hi-C	Chr3	Small	321774457	321781931	13	7474
Sikem	PacBio HiFi + Hi-C	Chr5	Small	48442471	48449941	11	7470
Sikem	PacBio HiFi + Hi-C	Chr5	Small	940200	947666	5	7466
Sikem	PacBio HiFi + Hi-C	Chr3	Small	41991098	41998523	2	7425
Sikem	PacBio HiFi + Hi-C	Chr4	Small	163220838	163228261	2	7423
Sikem	PacBio HiFi + Hi-C	Chr6	Small	145107371	145114791	4	7420
Sikem	PacBio HiFi + Hi-C	Chr7	Small	198968641	198976060	12	7419
Sikem	PacBio HiFi + Hi-C	Chr7	Small	302106130	302113537	3	7407
Sikem	PacBio HiFi + Hi-C	Chr3	Small	88532244	88539619	5	7375
Sikem	PacBio HiFi + Hi-C	Chr1	Small	164445316	164452666	9	7350
Sikem	PacBio HiFi + Hi-C	Chr5	Small	83850288	83857617	2	7329
Sikem	PacBio HiFi + Hi-C	Chr2	Small	177795543	177802865	23	7322
Sikem	PacBio HiFi + Hi-C	Chr4	Small	266193782	266201102	2	7320
Sikem	PacBio HiFi + Hi-C	Chr4	Small	401425443	401432761	7	7318
Sikem	PacBio HiFi + Hi-C	Chr1	Small	123068979	123076262	5	7283
Sikem	PacBio HiFi + Hi-C	Chr5	Small	141642525	141649801	7	7276
Sikem	PacBio HiFi + Hi-C	Chr2	Small	45128856	45136130	12	7274
Sikem	PacBio HiFi + Hi-C	Chr3	Small	166428140	166435404	2	7264
Sikem	PacBio HiFi + Hi-C	Chr1	Small	263101837	263109068	2	7231
Sikem	PacBio HiFi + Hi-C	Chr5	Small	5163922	5171125	5	7203
Sikem	PacBio HiFi + Hi-C	Chr3	Small	252654232	252661421	3	7189
Sikem	PacBio HiFi + Hi-C	Chr3	Small	51958979	51966135	3	7156
Sikem	PacBio HiFi + Hi-C	Chr3	Small	40409606	40416758	10	7152
Sikem	PacBio HiFi + Hi-C	Chr7	Small	62087131	62094282	7	7151
Sikem	PacBio HiFi + Hi-C	Chr5	Small	160333342	160340472	4	7130
Sikem	PacBio HiFi + Hi-C	Chr3	Small	226718526	226725590	2	7064
Sikem	PacBio HiFi + Hi-C	Chr5	Small	86155928	86162984	12	7056
Sikem	PacBio HiFi + Hi-C	Chr1	Small	104130326	104137372	4	7046
Sikem	PacBio HiFi + Hi-C	Chr2	Small	182716102	182723145	13	7043
Sikem	PacBio HiFi + Hi-C	Chr5	Small	38173298	38180331	5	7033
Sikem	PacBio HiFi + Hi-C	Chr3	Small	194840456	194847439	4	6983
Sikem	PacBio HiFi + Hi-C	Chr4	Small	200899025	200906003	6	6978
Sikem	PacBio HiFi + Hi-C	Chr6	Small	250043599	250050560	10	6961
Sikem	PacBio HiFi + Hi-C	Chr4	Small	98697302	98704261	13	6959
Sikem	PacBio HiFi + Hi-C	Chr3	Small	13561815	13568767	4	6952
Sikem	PacBio HiFi + Hi-C	Chr1	Small	75227446	75234369	2	6923
Sikem	PacBio HiFi + Hi-C	Chr7	Small	151487357	151494277	8	6920
Sikem	PacBio HiFi + Hi-C	Chr2	Small	101793378	101800286	3	6908
Sikem	PacBio HiFi + Hi-C	Chr7	Small	145060105	145067007	7	6902
Sikem	PacBio HiFi + Hi-C	Chr2	Small	301040073	301046933	5	6860
Sikem	PacBio HiFi + Hi-C	Chr3	Small	43348012	43354856	2	6844
Sikem	PacBio HiFi + Hi-C	Chr3	Small	161405952	161412792	18	6840
Sikem	PacBio HiFi + Hi-C	Chr3	Small	303342350	303349182	15	6832
Sikem	PacBio HiFi + Hi-C	Chr5	Small	235644271	235651101	9	6830
Sikem	PacBio HiFi + Hi-C	Chr2	Small	171437826	171444643	2	6817
Sikem	PacBio HiFi + Hi-C	Chr5	Small	140128459	140135270	11	6811
Sikem	PacBio HiFi + Hi-C	Chr1	Small	123266127	123272936	5	6809
Sikem	PacBio HiFi + Hi-C	Chr3	Small	122414117	122420922	4	6805
Sikem	PacBio HiFi + Hi-C	Chr4	Small	169178397	169185198	4	6801
Sikem	PacBio HiFi + Hi-C	Chr6	Small	24490556	24497342	6	6786
Sikem	PacBio HiFi + Hi-C	Chr5	Small	57498738	57505517	5	6779
Sikem	PacBio HiFi + Hi-C	Chr7	Small	232238700	232245458	5	6758
Sikem	PacBio HiFi + Hi-C	Chr2	Small	73314558	73321292	2	6734
Sikem	PacBio HiFi + Hi-C	Chr6	Small	128130928	128137650	34	6722
Sikem	PacBio HiFi + Hi-C	Chr7	Small	150215519	150222226	8	6707
Sikem	PacBio HiFi + Hi-C	Chr7	Small	24038856	24045506	3	6650
Sikem	PacBio HiFi + Hi-C	Chr4	Small	121776054	121782695	11	6641
Sikem	PacBio HiFi + Hi-C	Chr7	Small	178465085	178471726	3	6641
Sikem	PacBio HiFi + Hi-C	Chr5	Small	17326216	17332846	26	6630
Sikem	PacBio HiFi + Hi-C	Chr2	Small	104756265	104762880	10	6615
Sikem	PacBio HiFi + Hi-C	Chr5	Small	97609213	97615808	2	6595
Sikem	PacBio HiFi + Hi-C	Chr7	Small	22403101	22409678	4	6577
Sikem	PacBio HiFi + Hi-C	Chr5	Small	63689117	63695688	2	6571
Sikem	PacBio HiFi + Hi-C	Chr4	Small	42352093	42358660	4	6567
Sikem	PacBio HiFi + Hi-C	Chr3	Small	103572648	103579198	3	6550
Sikem	PacBio HiFi + Hi-C	Chr3	Small	146851898	146858442	4	6544
Sikem	PacBio HiFi + Hi-C	Chr4	Small	351573127	351579665	2	6538
Sikem	PacBio HiFi + Hi-C	Chr4	Small	362091255	362097764	2	6509
Sikem	PacBio HiFi + Hi-C	Chr4	Small	127780512	127787008	9	6496
Sikem	PacBio HiFi + Hi-C	Chr7	Small	280533933	280540423	3	6490
Sikem	PacBio HiFi + Hi-C	Chr7	Small	282933855	282940343	5	6488
Sikem	PacBio HiFi + Hi-C	Chr4	Small	419133803	419140258	8	6455
Sikem	PacBio HiFi + Hi-C	Chr7	Small	203944037	203950485	8	6448
Sikem	PacBio HiFi + Hi-C	Chr7	Small	130531779	130538206	15	6427
Sikem	PacBio HiFi + Hi-C	Chr7	Small	211304137	211310563	3	6426
Sikem	PacBio HiFi + Hi-C	Chr1	Small	61542705	61549106	2	6401
Sikem	PacBio HiFi + Hi-C	Chr4	Small	348739540	348745933	5	6393
Sikem	PacBio HiFi + Hi-C	Chr1	Small	134593913	134600303	5	6390
Sikem	PacBio HiFi + Hi-C	Chr2	Small	174173538	174179900	15	6362
Sikem	PacBio HiFi + Hi-C	Chr5	Small	250677106	250683448	15	6342
Sikem	PacBio HiFi + Hi-C	Chr4	Small	187734158	187740475	4	6317
Sikem	PacBio HiFi + Hi-C	Chr2	Small	165260485	165266794	2	6309
Sikem	PacBio HiFi + Hi-C	Chr5	Small	104977583	104983892	2	6309
Sikem	PacBio HiFi + Hi-C	Chr3	Small	7671792	7678092	22	6300
Sikem	PacBio HiFi + Hi-C	Chr1	Small	235754463	235760751	17	6288
Sikem	PacBio HiFi + Hi-C	Chr4	Small	180159910	180166160	7	6250
Sikem	PacBio HiFi + Hi-C	Chr5	Small	100316687	100322924	5	6237
Sikem	PacBio HiFi + Hi-C	Chr5	Small	153723141	153729376	6	6235
Sikem	PacBio HiFi + Hi-C	Chr1	Small	220539393	220545624	6	6231
Sikem	PacBio HiFi + Hi-C	Chr4	Small	367142527	367148736	6	6209
Sikem	PacBio HiFi + Hi-C	Chr1	Small	247895645	247901834	2	6189
Sikem	PacBio HiFi + Hi-C	Chr1	Small	40774	46958	14	6184
Sikem	PacBio HiFi + Hi-C	Chr1	Small	105570558	105576741	2	6183
Sikem	PacBio HiFi + Hi-C	Chr2	Small	147104894	147111076	3	6182
Sikem	PacBio HiFi + Hi-C	Chr3	Small	41894489	41900667	6	6178
Sikem	PacBio HiFi + Hi-C	Chr3	Small	332345270	332351442	4	6172
Sikem	PacBio HiFi + Hi-C	Chr2	Small	35177117	35183283	3	6166
Sikem	PacBio HiFi + Hi-C	Chr2	Small	151991224	151997364	5	6140
Sikem	PacBio HiFi + Hi-C	Chr7	Small	22292901	22299037	10	6136
Sikem	PacBio HiFi + Hi-C	Chr4	Small	286578864	286584991	13	6127
Sikem	PacBio HiFi + Hi-C	Chr1	Small	134914114	134920209	11	6095
Sikem	PacBio HiFi + Hi-C	Chr1	Small	192002198	192008223	2	6025
Sikem	PacBio HiFi + Hi-C	Chr5	Small	173592968	173598992	4	6024
Sikem	PacBio HiFi + Hi-C	Chr7	Small	108301469	108307490	11	6021
Sikem	PacBio HiFi + Hi-C	Chr5	Small	122347404	122353422	2	6018
Sikem	PacBio HiFi + Hi-C	Chr6	Small	81537963	81543981	2	6018
Sikem	PacBio HiFi + Hi-C	Chr5	Small	86911880	86917879	11	5999
Sikem	PacBio HiFi + Hi-C	Chr4	Small	127198688	127204664	2	5976
Sikem	PacBio HiFi + Hi-C	Chr7	Small	151184790	151190753	7	5963
Sikem	PacBio HiFi + Hi-C	Chr4	Small	318532703	318538647	2	5944
Sikem	PacBio HiFi + Hi-C	Chr3	Small	226455551	226461469	2	5918
Sikem	PacBio HiFi + Hi-C	Chr6	Small	155778447	155784337	20	5890
Sikem	PacBio HiFi + Hi-C	Chr2	Small	193051137	193057025	2	5888
Sikem	PacBio HiFi + Hi-C	Chr5	Small	116406238	116412112	58	5874
Sikem	PacBio HiFi + Hi-C	Chr7	Small	68638723	68644585	12	5862
Sikem	PacBio HiFi + Hi-C	Chr2	Small	80022108	80027949	5	5841
Sikem	PacBio HiFi + Hi-C	Chr7	Small	360437824	360443615	7	5791
Sikem	PacBio HiFi + Hi-C	Chr4	Small	420229306	420235093	6	5787
Sikem	PacBio HiFi + Hi-C	Chr2	Small	185132387	185138173	3	5786
Sikem	PacBio HiFi + Hi-C	Chr7	Small	36321125	36326890	7	5765
Sikem	PacBio HiFi + Hi-C	Chr7	Small	1956001	1961759	3	5758
Sikem	PacBio HiFi + Hi-C	Chr4	Small	32713286	32719028	4	5742
Sikem	PacBio HiFi + Hi-C	Chr7	Small	4249254	4254982	7	5728
Sikem	PacBio HiFi + Hi-C	Chr5	Small	92363092	92368797	7	5705
Sikem	PacBio HiFi + Hi-C	Chr6	Small	93493229	93498923	15	5694
Sikem	PacBio HiFi + Hi-C	Chr7	Small	4785468	4791157	4	5689
Sikem	PacBio HiFi + Hi-C	Chr6	Small	139727806	139733480	7	5674
Sikem	PacBio HiFi + Hi-C	Chr5	Small	160008727	160014381	3	5654
Sikem	PacBio HiFi + Hi-C	Chr1	Small	219632083	219637719	2	5636
Sikem	PacBio HiFi + Hi-C	Chr3	Small	189016410	189022009	11	5599
Sikem	PacBio HiFi + Hi-C	Chr4	Small	426413930	426419527	13	5597
Sikem	PacBio HiFi + Hi-C	Chr4	Small	219790403	219795965	3	5562
Sikem	PacBio HiFi + Hi-C	Chr4	Small	411234644	411240198	7	5554
Sikem	PacBio HiFi + Hi-C	Chr4	Small	412925195	412930736	17	5541
Sikem	PacBio HiFi + Hi-C	Chr2	Small	126667025	126672556	4	5531
Sikem	PacBio HiFi + Hi-C	Chr3	Small	209080136	209085667	17	5531
Sikem	PacBio HiFi + Hi-C	Chr1	Small	85316920	85322387	29	5467
Sikem	PacBio HiFi + Hi-C	Chr7	Small	34290733	34296188	11	5455
Sikem	PacBio HiFi + Hi-C	Chr6	Small	109531067	109536512	2	5445
Sikem	PacBio HiFi + Hi-C	Chr2	Small	192329385	192334817	5	5432
Sikem	PacBio HiFi + Hi-C	Chr4	Small	401527249	401532674	2	5425
Sikem	PacBio HiFi + Hi-C	Chr5	Small	160087062	160092472	2	5410
Sikem	PacBio HiFi + Hi-C	Chr5	Small	238158336	238163744	7	5408
Sikem	PacBio HiFi + Hi-C	Chr4	Small	222189589	222194996	6	5407
Sikem	PacBio HiFi + Hi-C	Chr6	Small	17533844	17539241	12	5397
Sikem	PacBio HiFi + Hi-C	Chr7	Small	84268316	84273701	9	5385
Sikem	PacBio HiFi + Hi-C	Chr4	Small	74962794	74968159	22	5365
Sikem	PacBio HiFi + Hi-C	Chr7	Small	56567805	56573162	6	5357
Sikem	PacBio HiFi + Hi-C	Chr5	Small	74731257	74736602	4	5345
Sikem	PacBio HiFi + Hi-C	Chr6	Small	34084064	34089409	2	5345
Sikem	PacBio HiFi + Hi-C	Chr1	Small	86387687	86393017	3	5330
Sikem	PacBio HiFi + Hi-C	Chr3	Small	105385450	105390780	5	5330
Sikem	PacBio HiFi + Hi-C	Chr4	Small	191496185	191501481	2	5296
Sikem	PacBio HiFi + Hi-C	Chr6	Small	161391213	161396503	15	5290
Sikem	PacBio HiFi + Hi-C	Chr2	Small	299720883	299726131	4	5248
Sikem	PacBio HiFi + Hi-C	Chr4	Small	321191428	321196653	5	5225
Sikem	PacBio HiFi + Hi-C	Chr3	Small	192044184	192049405	5	5221
Sikem	PacBio HiFi + Hi-C	Chr5	Small	112084558	112089776	4	5218
Sikem	PacBio HiFi + Hi-C	Chr7	Small	110022778	110027995	14	5217
Sikem	PacBio HiFi + Hi-C	Chr1	Small	12811	18008	3	5197
Sikem	PacBio HiFi + Hi-C	Chr1	Small	248765929	248771115	3	5186
Sikem	PacBio HiFi + Hi-C	Chr3	Small	285916914	285922095	8	5181
Sikem	PacBio HiFi + Hi-C	Chr2	Small	256564256	256569430	4	5174
Sikem	PacBio HiFi + Hi-C	Chr3	Small	353850297	353855442	7	5145
Sikem	PacBio HiFi + Hi-C	Chr3	Small	152816543	152821677	5	5134
Sikem	PacBio HiFi + Hi-C	Chr6	Small	194222072	194227205	2	5133
Sikem	PacBio HiFi + Hi-C	Chr6	Small	35517728	35522853	3	5125
Sikem	PacBio HiFi + Hi-C	Chr6	Small	166371046	166376170	4	5124
Sikem	PacBio HiFi + Hi-C	Chr4	Small	351466312	351471428	15	5116
Sikem	PacBio HiFi + Hi-C	Chr1	Small	9845629	9850738	2	5109
Sikem	PacBio HiFi + Hi-C	Chr4	Small	351499676	351504779	5	5103
Sikem	PacBio HiFi + Hi-C	Chr3	Small	359759618	359764719	4	5101
Sikem	PacBio HiFi + Hi-C	Chr3	Small	13635611	13640697	14	5086
Sikem	PacBio HiFi + Hi-C	Chr4	Small	13332380	13337450	11	5070
Sikem	PacBio HiFi + Hi-C	Chr7	Small	104723951	104729012	16	5061
Sikem	PacBio HiFi + Hi-C	Chr4	Small	425169211	425174263	9	5052
Sikem	PacBio HiFi + Hi-C	Chr6	Small	21416768	21421789	8	5021
Sikem	PacBio HiFi + Hi-C	Chr7	Small	48142194	48147214	2	5020
Sikem	PacBio HiFi + Hi-C	Chr7	Small	250580140	250585152	3	5012
Sikem	PacBio HiFi + Hi-C	Chr7	Small	123525043	123530027	5	4984
Sikem	PacBio HiFi + Hi-C	Chr3	Small	167663407	167668361	2	4954
Sikem	PacBio HiFi + Hi-C	Chr4	Small	73715059	73720004	5	4945
Sikem	PacBio HiFi + Hi-C	Chr6	Small	96496717	96501654	6	4937
Sikem	PacBio HiFi + Hi-C	Chr7	Small	83189118	83194055	2	4937
Sikem	PacBio HiFi + Hi-C	Chr5	Small	54753059	54757988	7	4929
Sikem	PacBio HiFi + Hi-C	Chr6	Small	95164448	95169374	7	4926
Sikem	PacBio HiFi + Hi-C	Chr1	Small	239495435	239500349	8	4914
Sikem	PacBio HiFi + Hi-C	Chr3	Small	42032813	42037720	9	4907
Sikem	PacBio HiFi + Hi-C	Chr3	Small	374226710	374231607	4	4897
Sikem	PacBio HiFi + Hi-C	Chr2	Small	188963287	188968181	5	4894
Sikem	PacBio HiFi + Hi-C	Chr3	Small	83302062	83306934	3	4872
Sikem	PacBio HiFi + Hi-C	Chr5	Small	96736202	96741067	3	4865
Sikem	PacBio HiFi + Hi-C	Chr2	Small	101603999	101608857	6	4858
Sikem	PacBio HiFi + Hi-C	Chr4	Small	420255346	420260180	21	4834
Sikem	PacBio HiFi + Hi-C	Chr4	Small	173454383	173459201	17	4818
Sikem	PacBio HiFi + Hi-C	Chr5	Small	63267784	63272583	2	4799
Sikem	PacBio HiFi + Hi-C	Chr4	Small	271112080	271116874	5	4794
Sikem	PacBio HiFi + Hi-C	Chr7	Small	151969672	151974463	14	4791
Sikem	PacBio HiFi + Hi-C	Chr3	Small	129536352	129541127	2	4775
Sikem	PacBio HiFi + Hi-C	Chr5	Small	104762633	104767405	5	4772
Sikem	PacBio HiFi + Hi-C	Chr3	Small	171270502	171275253	3	4751
Sikem	PacBio HiFi + Hi-C	Chr3	Small	284920061	284924799	3	4738
Sikem	PacBio HiFi + Hi-C	Chr3	Small	5811943	5816653	6	4710
Sikem	PacBio HiFi + Hi-C	Chr4	Small	69877475	69882159	24	4684
Sikem	PacBio HiFi + Hi-C	Chr3	Small	138152978	138157648	22	4670
Sikem	PacBio HiFi + Hi-C	Chr3	Small	237966168	237970837	4	4669
Sikem	PacBio HiFi + Hi-C	Chr3	Small	249391577	249396240	2	4663
Sikem	PacBio HiFi + Hi-C	Chr1	Small	104884915	104889543	2	4628
Sikem	PacBio HiFi + Hi-C	Chr7	Small	26638719	26643344	4	4625
Sikem	PacBio HiFi + Hi-C	Chr1	Small	60613416	60618032	8	4616
Sikem	PacBio HiFi + Hi-C	Chr1	Small	263189161	263193759	2	4598
Sikem	PacBio HiFi + Hi-C	Chr6	Small	78409142	78413735	2	4593
Sikem	PacBio HiFi + Hi-C	Chr6	Small	223499198	223503781	3	4583
Sikem	PacBio HiFi + Hi-C	Chr5	Small	69735591	69740171	8	4580
Sikem	PacBio HiFi + Hi-C	Chr3	Small	348005154	348009723	13	4569
Sikem	PacBio HiFi + Hi-C	Chr5	Small	112720131	112724700	2	4569
Sikem	PacBio HiFi + Hi-C	Chr3	Small	327338960	327343521	2	4561
Sikem	PacBio HiFi + Hi-C	Chr6	Small	97681423	97685955	4	4532
Sikem	PacBio HiFi + Hi-C	Chr4	Small	322832671	322837150	12	4479
Sikem	PacBio HiFi + Hi-C	Chr5	Small	24896292	24900755	3	4463
Sikem	PacBio HiFi + Hi-C	Chr5	Small	158629466	158633927	3	4461
Sikem	PacBio HiFi + Hi-C	Chr2	Small	183232647	183237094	2	4447
Sikem	PacBio HiFi + Hi-C	Chr4	Small	296518288	296522731	19	4443
Sikem	PacBio HiFi + Hi-C	Chr6	Small	247319571	247324011	5	4440
Sikem	PacBio HiFi + Hi-C	Chr3	Small	62126510	62130925	8	4415
Sikem	PacBio HiFi + Hi-C	Chr4	Small	311704410	311708825	9	4415
Sikem	PacBio HiFi + Hi-C	Chr3	Small	112433933	112438333	2	4400
Sikem	PacBio HiFi + Hi-C	Chr7	Small	767678	772063	5	4385
Sikem	PacBio HiFi + Hi-C	Chr4	Small	301170792	301175176	7	4384
Sikem	PacBio HiFi + Hi-C	Chr7	Small	263967565	263971918	5	4353
Sikem	PacBio HiFi + Hi-C	Chr4	Small	408943022	408947346	2	4324
Sikem	PacBio HiFi + Hi-C	Chr6	Small	47374178	47378482	5	4304
Sikem	PacBio HiFi + Hi-C	Chr5	Small	77416279	77420573	3	4294
Sikem	PacBio HiFi + Hi-C	Chr7	Small	53659126	53663411	4	4285
Sikem	PacBio HiFi + Hi-C	Chr6	Small	141687368	141691644	9	4276
Sikem	PacBio HiFi + Hi-C	Chr1	Small	49966907	49971160	2	4253
Sikem	PacBio HiFi + Hi-C	Chr6	Small	61151401	61155653	2	4252
Sikem	PacBio HiFi + Hi-C	Chr5	Small	157894276	157898523	6	4247
Sikem	PacBio HiFi + Hi-C	Chr6	Small	140610736	140614941	5	4205
Sikem	PacBio HiFi + Hi-C	Chr1	Small	216789529	216793731	8	4202
Sikem	PacBio HiFi + Hi-C	Chr1	Small	229182236	229186434	7	4198
Sikem	PacBio HiFi + Hi-C	Chr4	Small	425117403	425121590	17	4187
Sikem	PacBio HiFi + Hi-C	Chr3	Small	316921513	316925699	5	4186
Sikem	PacBio HiFi + Hi-C	Chr7	Small	78498550	78502709	2	4159
Sikem	PacBio HiFi + Hi-C	Chr3	Small	168592666	168596818	12	4152
Sikem	PacBio HiFi + Hi-C	Chr6	Small	63942732	63946879	4	4147
Sikem	PacBio HiFi + Hi-C	Chr4	Small	411414166	411418295	5	4129
Sikem	PacBio HiFi + Hi-C	Chr4	Small	300294482	300298587	18	4105
Sikem	PacBio HiFi + Hi-C	Chr4	Small	48123873	48127959	3	4086
Sikem	PacBio HiFi + Hi-C	Chr7	Small	164807555	164811589	7	4034
Sikem	PacBio HiFi + Hi-C	Chr3	Small	190089880	190093910	7	4030
Sikem	PacBio HiFi + Hi-C	Chr4	Small	329621196	329625199	4	4003
Sikem	PacBio HiFi + Hi-C	Chr4	Small	160983033	160987032	3	3999
Sikem	PacBio HiFi + Hi-C	Chr3	Small	131373716	131377698	6	3982
Sikem	PacBio HiFi + Hi-C	Chr3	Small	373388528	373392501	5	3973
Sikem	PacBio HiFi + Hi-C	Chr6	Small	95246554	95250473	8	3919
Sikem	PacBio HiFi + Hi-C	Chr4	Small	329589694	329593603	3	3909
Sikem	PacBio HiFi + Hi-C	Chr5	Small	63754369	63758273	15	3904
Sikem	PacBio HiFi + Hi-C	Chr4	Small	280973002	280976894	5	3892
Sikem	PacBio HiFi + Hi-C	Chr5	Small	96257028	96260919	2	3891
Sikem	PacBio HiFi + Hi-C	Chr6	Small	68635024	68638891	3	3867
Sikem	PacBio HiFi + Hi-C	Chr2	Small	65000697	65004535	5	3838
Sikem	PacBio HiFi + Hi-C	Chr1	Small	1721889	1725724	6	3835
Sikem	PacBio HiFi + Hi-C	Chr7	Small	125813028	125816835	3	3807
Sikem	PacBio HiFi + Hi-C	Chr5	Small	189269847	189273640	10	3793
Sikem	PacBio HiFi + Hi-C	Chr7	Small	84207209	84210994	6	3785
Sikem	PacBio HiFi + Hi-C	Chr3	Small	262724790	262728545	2	3755
Sikem	PacBio HiFi + Hi-C	Chr4	Small	198371657	198375396	2	3739
Sikem	PacBio HiFi + Hi-C	Chr2	Small	242641506	242645223	8	3717
Sikem	PacBio HiFi + Hi-C	Chr7	Small	51059952	51063656	8	3704
Sikem	PacBio HiFi + Hi-C	Chr3	Small	387791209	387794899	13	3690
Sikem	PacBio HiFi + Hi-C	Chr3	Small	144008884	144012528	2	3644
Sikem	PacBio HiFi + Hi-C	Chr5	Small	123503052	123506682	5	3630
Sikem	PacBio HiFi + Hi-C	Chr2	Small	225973187	225976814	5	3627
Sikem	PacBio HiFi + Hi-C	Chr2	Small	49203755	49207380	3	3625
Sikem	PacBio HiFi + Hi-C	Chr3	Small	40741129	40744726	2	3597
Sikem	PacBio HiFi + Hi-C	Chr7	Small	302694945	302698527	3	3582
Sikem	PacBio HiFi + Hi-C	Chr4	Small	168415709	168419271	3	3562
Sikem	PacBio HiFi + Hi-C	Chr4	Small	185275951	185279506	6	3555
Sikem	PacBio HiFi + Hi-C	Chr5	Small	77054812	77058343	4	3531
Sikem	PacBio HiFi + Hi-C	Chr1	Small	164155962	164159492	4	3530
Sikem	PacBio HiFi + Hi-C	Chr4	Small	288613639	288617168	4	3529
Sikem	PacBio HiFi + Hi-C	Chr7	Small	244885173	244888698	9	3525
Sikem	PacBio HiFi + Hi-C	Chr2	Small	227901965	227905474	3	3509
Sikem	PacBio HiFi + Hi-C	Chr2	Small	15494521	15498028	6	3507
Sikem	PacBio HiFi + Hi-C	Chr7	Small	242154139	242157646	5	3507
Sikem	PacBio HiFi + Hi-C	Chr3	Small	232279388	232282888	2	3500
Sikem	PacBio HiFi + Hi-C	Chr6	Small	87285277	87288774	11	3497
Sikem	PacBio HiFi + Hi-C	Chr1	Small	256460665	256464160	8	3495
Sikem	PacBio HiFi + Hi-C	Chr3	Small	117080675	117084168	2	3493
Sikem	PacBio HiFi + Hi-C	Chr2	Small	148482337	148485816	28	3479
Sikem	PacBio HiFi + Hi-C	Chr4	Small	77714455	77717926	6	3471
Sikem	PacBio HiFi + Hi-C	Chr5	Small	92437872	92441343	6	3471
Sikem	PacBio HiFi + Hi-C	Chr5	Small	199464113	199467575	4	3462
Sikem	PacBio HiFi + Hi-C	Chr3	Small	224435197	224438650	3	3453
Sikem	PacBio HiFi + Hi-C	Chr4	Small	91321800	91325252	3	3452
Sikem	PacBio HiFi + Hi-C	Chr4	Small	187140856	187144292	2	3436
Sikem	PacBio HiFi + Hi-C	Chr2	Small	16500530	16503960	11	3430
Sikem	PacBio HiFi + Hi-C	Chr6	Small	128292344	128295769	4	3425
Sikem	PacBio HiFi + Hi-C	Chr2	Small	300184723	300188141	15	3418
Sikem	PacBio HiFi + Hi-C	Chr5	Small	229286564	229289940	3	3376
Sikem	PacBio HiFi + Hi-C	Chr1	Small	207581534	207584903	6	3369
Sikem	PacBio HiFi + Hi-C	Chr3	Small	155135870	155139215	2	3345
Sikem	PacBio HiFi + Hi-C	Chr5	Small	39585799	39589135	13	3336
Sikem	PacBio HiFi + Hi-C	Chr7	Small	121447466	121450777	2	3311
Sikem	PacBio HiFi + Hi-C	Chr4	Small	304855676	304858986	11	3310
Sikem	PacBio HiFi + Hi-C	Chr4	Small	74779672	74782981	3	3309
Sikem	PacBio HiFi + Hi-C	Chr4	Small	426509590	426512898	5	3308
Sikem	PacBio HiFi + Hi-C	Chr7	Small	221043474	221046781	2	3307
Sikem	PacBio HiFi + Hi-C	Chr3	Small	149940061	149943356	8	3295
Sikem	PacBio HiFi + Hi-C	Chr4	Small	300269443	300272733	6	3290
Sikem	PacBio HiFi + Hi-C	Chr3	Small	144787563	144790844	2	3281
Sikem	PacBio HiFi + Hi-C	Chr3	Small	388386551	388389830	2	3279
Sikem	PacBio HiFi + Hi-C	Chr7	Small	217531264	217534539	4	3275
Sikem	PacBio HiFi + Hi-C	Chr1	Small	6470957	6474221	2	3264
Sikem	PacBio HiFi + Hi-C	Chr4	Small	46780791	46784055	13	3264
Sikem	PacBio HiFi + Hi-C	Chr3	Small	22759748	22763009	13	3261
Sikem	PacBio HiFi + Hi-C	Chr1	Small	6128880	6132133	4	3253
Sikem	PacBio HiFi + Hi-C	Chr4	Small	82133391	82136641	5	3250
Sikem	PacBio HiFi + Hi-C	Chr3	Small	42493255	42496493	12	3238
Sikem	PacBio HiFi + Hi-C	Chr6	Small	21468507	21471739	20	3232
Sikem	PacBio HiFi + Hi-C	Chr3	Small	26034189	26037420	34	3231
Sikem	PacBio HiFi + Hi-C	Chr3	Small	13926694	13929917	6	3223
Sikem	PacBio HiFi + Hi-C	Chr7	Small	349481184	349484405	27	3221
Sikem	PacBio HiFi + Hi-C	Chr1	Small	60320447	60323665	5	3218
Sikem	PacBio HiFi + Hi-C	Chr4	Small	122847750	122850944	3	3194
Sikem	PacBio HiFi + Hi-C	Chr2	Small	167489799	167492966	4	3167
Sikem	PacBio HiFi + Hi-C	Chr2	Small	175576184	175579344	5	3160
Sikem	PacBio HiFi + Hi-C	Chr7	Small	217281633	217284765	6	3132
Sikem	PacBio HiFi + Hi-C	Chr1	Small	201200635	201203762	10	3127
Sikem	PacBio HiFi + Hi-C	Chr4	Small	165817141	165820258	5	3117
Sikem	PacBio HiFi + Hi-C	Chr5	Small	86465260	86468363	5	3103
Sikem	PacBio HiFi + Hi-C	Chr5	Small	68202700	68205801	3	3101
Sikem	PacBio HiFi + Hi-C	Chr5	Small	49473574	49476673	6	3099
Sikem	PacBio HiFi + Hi-C	Chr6	Small	108163443	108166542	3	3099
Sikem	PacBio HiFi + Hi-C	Chr3	Small	42252637	42255732	6	3095
Sikem	PacBio HiFi + Hi-C	Chr1	Small	256909771	256912865	5	3094
Sikem	PacBio HiFi + Hi-C	Chr3	Small	104794903	104797997	9	3094
Sikem	PacBio HiFi + Hi-C	Chr2	Small	73685927	73689013	2	3086
Sikem	PacBio HiFi + Hi-C	Chr1	Small	2405197	2408272	4	3075
Sikem	PacBio HiFi + Hi-C	Chr4	Small	135468356	135471431	9	3075
Sikem	PacBio HiFi + Hi-C	Chr1	Small	255460411	255463452	5	3041
Sikem	PacBio HiFi + Hi-C	Chr3	Small	84528722	84531756	4	3034
Sikem	PacBio HiFi + Hi-C	Chr6	Small	100723918	100726952	8	3034
Sikem	PacBio HiFi + Hi-C	Chr7	Small	149824269	149827295	2	3026
Sikem	PacBio HiFi + Hi-C	Chr7	Small	3011144	3014164	7	3020
Sikem	PacBio HiFi + Hi-C	Chr2	Small	249405732	249408740	2	3008
Sikem	PacBio HiFi + Hi-C	Chr3	Small	142757535	142760532	18	2997
Sikem	PacBio HiFi + Hi-C	Chr3	Small	353013125	353016110	7	2985
Sikem	PacBio HiFi + Hi-C	Chr6	Small	106220841	106223798	11	2957
Sikem	PacBio HiFi + Hi-C	Chr7	Small	113432066	113435009	4	2943
Sikem	PacBio HiFi + Hi-C	Chr7	Small	293195328	293198269	4	2941
Sikem	PacBio HiFi + Hi-C	Chr6	Small	64921522	64924442	4	2920
Sikem	PacBio HiFi + Hi-C	Chr7	Small	245990230	245993149	14	2919
Sikem	PacBio HiFi + Hi-C	Chr2	Small	85594270	85597184	5	2914
Sikem	PacBio HiFi + Hi-C	Chr3	Small	174586235	174589123	8	2888
Sikem	PacBio HiFi + Hi-C	Chr3	Small	292244577	292247463	14	2886
Sikem	PacBio HiFi + Hi-C	Chr7	Small	34202016	34204902	4	2886
Sikem	PacBio HiFi + Hi-C	Chr2	Small	181834770	181837627	2	2857
Sikem	PacBio HiFi + Hi-C	Chr6	Small	92959283	92962112	2	2829
Sikem	PacBio HiFi + Hi-C	Chr4	Small	299439977	299442801	27	2824
Sikem	PacBio HiFi + Hi-C	Chr3	Small	12547454	12550239	10	2785
Sikem	PacBio HiFi + Hi-C	Chr3	Small	74914857	74917641	3	2784
Sikem	PacBio HiFi + Hi-C	Chr2	Small	8865962	8868742	2	2780
Sikem	PacBio HiFi + Hi-C	Chr3	Small	100437732	100440509	2	2777
Sikem	PacBio HiFi + Hi-C	Chr1	Small	214793316	214796071	3	2755
Sikem	PacBio HiFi + Hi-C	Chr6	Small	114280372	114283127	3	2755
Sikem	PacBio HiFi + Hi-C	Chr6	Small	47331444	47334186	2	2742
Sikem	PacBio HiFi + Hi-C	Chr4	Small	168500980	168503713	3	2733
Sikem	PacBio HiFi + Hi-C	Chr5	Small	121768143	121770864	17	2721
Sikem	PacBio HiFi + Hi-C	Chr5	Small	25862076	25864790	7	2714
Sikem	PacBio HiFi + Hi-C	Chr2	Small	24612882	24615577	6	2695
Sikem	PacBio HiFi + Hi-C	Chr2	Small	191780228	191782922	14	2694
Sikem	PacBio HiFi + Hi-C	Chr3	Small	265229060	265231754	4	2694
Sikem	PacBio HiFi + Hi-C	Chr5	Small	60794110	60796794	10	2684
Sikem	PacBio HiFi + Hi-C	Chr7	Small	93844110	93846754	3	2644
Sikem	PacBio HiFi + Hi-C	Chr2	Small	143083168	143085801	2	2633
Sikem	PacBio HiFi + Hi-C	Chr3	Small	153041020	153043644	12	2624
Sikem	PacBio HiFi + Hi-C	Chr4	Small	295137729	295140347	2	2618
Sikem	PacBio HiFi + Hi-C	Chr4	Small	299566654	299569268	47	2614
Sikem	PacBio HiFi + Hi-C	Chr7	Small	247919445	247922059	3	2614
Sikem	PacBio HiFi + Hi-C	Chr5	Small	145676926	145679504	4	2578
Sikem	PacBio HiFi + Hi-C	Chr1	Small	218840713	218843290	20	2577
Sikem	PacBio HiFi + Hi-C	Chr2	Small	280879204	280881779	2	2575
Sikem	PacBio HiFi + Hi-C	Chr5	Small	160481789	160484363	3	2574
Sikem	PacBio HiFi + Hi-C	Chr4	Small	98747357	98749913	4	2556
Sikem	PacBio HiFi + Hi-C	Chr4	Small	290363501	290366052	2	2551
Sikem	PacBio HiFi + Hi-C	Chr3	Small	248680826	248683366	4	2540
Sikem	PacBio HiFi + Hi-C	Chr3	Small	361100153	361102690	2	2537
Sikem	PacBio HiFi + Hi-C	Chr4	Small	223160507	223163043	5	2536
Sikem	PacBio HiFi + Hi-C	Chr7	Small	137634057	137636588	6	2531
Sikem	PacBio HiFi + Hi-C	Chr5	Small	234365883	234368406	2	2523
Sikem	PacBio HiFi + Hi-C	Chr3	Small	17982640	17985154	15	2514
Sikem	PacBio HiFi + Hi-C	Chr4	Small	409480440	409482935	5	2495
Sikem	PacBio HiFi + Hi-C	Chr5	Small	207353463	207355953	5	2490
Sikem	PacBio HiFi + Hi-C	Chr4	Small	195489523	195492007	5	2484
Sikem	PacBio HiFi + Hi-C	Chr7	Small	316062547	316065027	5	2480
Sikem	PacBio HiFi + Hi-C	Chr5	Small	4338043	4340522	10	2479
Sikem	PacBio HiFi + Hi-C	Chr7	Small	364963496	364965964	2	2468
Sikem	PacBio HiFi + Hi-C	Chr7	Small	175534780	175537242	21	2462
Sikem	PacBio HiFi + Hi-C	Chr1	Small	272876690	272879149	3	2459
Sikem	PacBio HiFi + Hi-C	Chr5	Small	99496651	99499093	11	2442
Sikem	PacBio HiFi + Hi-C	Chr2	Small	158281600	158284038	7	2438
Sikem	PacBio HiFi + Hi-C	Chr2	Small	16523119	16525547	10	2428
Sikem	PacBio HiFi + Hi-C	Chr5	Small	252224085	252226512	5	2427
Sikem	PacBio HiFi + Hi-C	Chr1	Small	220155140	220157546	13	2406
Sikem	PacBio HiFi + Hi-C	Chr3	Small	361172412	361174811	3	2399
Sikem	PacBio HiFi + Hi-C	Chr3	Small	295507529	295509916	4	2387
Sikem	PacBio HiFi + Hi-C	Chr6	Small	123677756	123680140	6	2384
Sikem	PacBio HiFi + Hi-C	Chr1	Small	134157291	134159668	4	2377
Sikem	PacBio HiFi + Hi-C	Chr3	Small	45495522	45497890	3	2368
Sikem	PacBio HiFi + Hi-C	Chr3	Small	241011312	241013677	3	2365
Sikem	PacBio HiFi + Hi-C	Chr3	Small	169677092	169679451	3	2359
Sikem	PacBio HiFi + Hi-C	Chr6	Small	174947661	174950017	2	2356
Sikem	PacBio HiFi + Hi-C	Chr7	Small	120970220	120972562	3	2342
Sikem	PacBio HiFi + Hi-C	Chr7	Small	22860936	22863267	4	2331
Sikem	PacBio HiFi + Hi-C	Chr7	Small	28642526	28644844	16	2318
Sikem	PacBio HiFi + Hi-C	Chr4	Small	20286785	20289098	3	2313
Sikem	PacBio HiFi + Hi-C	Chr2	Small	50361971	50364283	6	2312
Sikem	PacBio HiFi + Hi-C	Chr4	Small	422487128	422489409	4	2281
Sikem	PacBio HiFi + Hi-C	Chr5	Small	61932374	61934648	26	2274
Sikem	PacBio HiFi + Hi-C	Chr2	Small	11192744	11195014	3	2270
Sikem	PacBio HiFi + Hi-C	Chr4	Small	255641378	255643628	8	2250
Sikem	PacBio HiFi + Hi-C	Chr2	Small	62870955	62873190	3	2235
Sikem	PacBio HiFi + Hi-C	Chr3	Small	283894680	283896911	3	2231
Sikem	PacBio HiFi + Hi-C	Chr4	Small	330767025	330769245	3	2220
Sikem	PacBio HiFi + Hi-C	Chr6	Small	127965123	127967316	3	2193
Sikem	PacBio HiFi + Hi-C	Chr5	Small	182255052	182257237	2	2185
Sikem	PacBio HiFi + Hi-C	Chr1	Small	157430997	157433168	2	2171
Sikem	PacBio HiFi + Hi-C	Chr3	Small	97261056	97263203	3	2147
Sikem	PacBio HiFi + Hi-C	Chr3	Small	96445239	96447370	3	2131
Sikem	PacBio HiFi + Hi-C	Chr5	Small	69656954	69659081	2	2127
Sikem	PacBio HiFi + Hi-C	Chr2	Small	26203398	26205516	5	2118
Sikem	PacBio HiFi + Hi-C	Chr3	Small	196749665	196751780	3	2115
Sikem	PacBio HiFi + Hi-C	Chr3	Small	108173414	108175502	4	2088
Sikem	PacBio HiFi + Hi-C	Chr4	Small	389011153	389013236	8	2083
Sikem	PacBio HiFi + Hi-C	Chr2	Small	301075646	301077726	9	2080
Sikem	PacBio HiFi + Hi-C	Chr4	Small	389218369	389220434	9	2065
Sikem	PacBio HiFi + Hi-C	Chr1	Small	48549194	48551248	5	2054
Sikem	PacBio HiFi + Hi-C	Chr5	Small	45988395	45990446	2	2051
Sikem	PacBio HiFi + Hi-C	Chr1	Small	114675189	114677236	2	2047
Sikem	PacBio HiFi + Hi-C	Chr6	Small	100695686	100697709	6	2023
Sikem	PacBio HiFi + Hi-C	Chr7	Small	198348354	198350375	4	2021
Sikem	PacBio HiFi + Hi-C	Chr4	Small	187770439	187772459	3	2020
Sikem	PacBio HiFi + Hi-C	Chr3	Small	385286395	385288382	6	1987
Sikem	PacBio HiFi + Hi-C	Chr1	Small	224401081	224403059	5	1978
Sikem	PacBio HiFi + Hi-C	Chr7	Small	137662841	137664814	3	1973
Sikem	PacBio HiFi + Hi-C	Chr3	Small	147266576	147268526	2	1950
Sikem	PacBio HiFi + Hi-C	Chr5	Small	7572611	7574561	8	1950
Sikem	PacBio HiFi + Hi-C	Chr2	Small	143633195	143635140	7	1945
Sikem	PacBio HiFi + Hi-C	Chr7	Small	204712952	204714886	7	1934
Sikem	PacBio HiFi + Hi-C	Chr5	Small	93737196	93739116	12	1920
Sikem	PacBio HiFi + Hi-C	Chr3	Small	116894584	116896503	11	1919
Sikem	PacBio HiFi + Hi-C	Chr4	Small	309689014	309690920	2	1906
Sikem	PacBio HiFi + Hi-C	Chr6	Small	151174134	151176027	2	1893
Sikem	PacBio HiFi + Hi-C	Chr7	Small	345131004	345132888	19	1884
Sikem	PacBio HiFi + Hi-C	Chr5	Small	127799030	127800913	3	1883
Sikem	PacBio HiFi + Hi-C	Chr2	Small	76682494	76684373	16	1879
Sikem	PacBio HiFi + Hi-C	Chr7	Small	96066045	96067917	2	1872
Sikem	PacBio HiFi + Hi-C	Chr1	Small	127012575	127014437	6	1862
Sikem	PacBio HiFi + Hi-C	Chr4	Small	28682075	28683935	8	1860
Sikem	PacBio HiFi + Hi-C	Chr7	Small	112517766	112519616	8	1850
Sikem	PacBio HiFi + Hi-C	Chr1	Small	163584767	163586614	6	1847
Sikem	PacBio HiFi + Hi-C	Chr7	Small	86093116	86094962	5	1846
Sikem	PacBio HiFi + Hi-C	Chr7	Small	168726684	168728528	3	1844
Sikem	PacBio HiFi + Hi-C	Chr4	Small	204908355	204910181	2	1826
Sikem	PacBio HiFi + Hi-C	Chr2	Small	145423121	145424938	5	1817
Sikem	PacBio HiFi + Hi-C	Chr2	Small	71869270	71871082	5	1812
Sikem	PacBio HiFi + Hi-C	Chr5	Small	116088988	116090776	13	1788
Sikem	PacBio HiFi + Hi-C	Chr6	Small	68862130	68863915	2	1785
Sikem	PacBio HiFi + Hi-C	Chr4	Small	309330042	309331819	2	1777
Sikem	PacBio HiFi + Hi-C	Chr4	Small	418959338	418961114	3	1776
Sikem	PacBio HiFi + Hi-C	Chr7	Small	362994414	362996188	2	1774
Sikem	PacBio HiFi + Hi-C	Chr3	Small	29034385	29036157	4	1772
Sikem	PacBio HiFi + Hi-C	Chr3	Small	384712775	384714539	22	1764
Sikem	PacBio HiFi + Hi-C	Chr3	Small	380744854	380746604	5	1750
Sikem	PacBio HiFi + Hi-C	Chr2	Small	223429366	223431085	9	1719
Sikem	PacBio HiFi + Hi-C	Chr4	Small	171824995	171826712	3	1717
Sikem	PacBio HiFi + Hi-C	Chr4	Small	329558460	329560175	2	1715
Sikem	PacBio HiFi + Hi-C	Chr4	Small	284478337	284480051	2	1714
Sikem	PacBio HiFi + Hi-C	Chr2	Small	183274216	183275925	8	1709
Sikem	PacBio HiFi + Hi-C	Chr3	Small	71865745	71867448	3	1703
Sikem	PacBio HiFi + Hi-C	Chr3	Small	145255836	145257539	2	1703
Sikem	PacBio HiFi + Hi-C	Chr3	Small	289624171	289625873	3	1702
Sikem	PacBio HiFi + Hi-C	Chr6	Small	99154612	99156309	16	1697
Sikem	PacBio HiFi + Hi-C	Chr2	Small	106435687	106437379	4	1692
Sikem	PacBio HiFi + Hi-C	Chr7	Small	118624840	118626528	2	1688
Sikem	PacBio HiFi + Hi-C	Chr3	Small	154664783	154666470	26	1687
Sikem	PacBio HiFi + Hi-C	Chr4	Small	277337634	277339320	2	1686
Sikem	PacBio HiFi + Hi-C	Chr2	Small	99841491	99843159	6	1668
Sikem	PacBio HiFi + Hi-C	Chr5	Small	167698716	167700378	4	1662
Sikem	PacBio HiFi + Hi-C	Chr4	Small	174442172	174443828	2	1656
Sikem	PacBio HiFi + Hi-C	Chr6	Small	204893079	204894730	7	1651
Sikem	PacBio HiFi + Hi-C	Chr2	Small	68123556	68125204	4	1648
Sikem	PacBio HiFi + Hi-C	Chr3	Small	12575096	12576737	21	1641
Sikem	PacBio HiFi + Hi-C	Chr7	Small	103900054	103901695	6	1641
Sikem	PacBio HiFi + Hi-C	Chr6	Small	111130931	111132565	11	1634
Sikem	PacBio HiFi + Hi-C	Chr5	Small	89741276	89742909	8	1633
Sikem	PacBio HiFi + Hi-C	Chr5	Small	211426424	211428057	9	1633
Sikem	PacBio HiFi + Hi-C	Chr6	Small	96000021	96001645	7	1624
Sikem	PacBio HiFi + Hi-C	Chr4	Small	295351140	295352734	9	1594
Sikem	PacBio HiFi + Hi-C	Chr7	Small	79384693	79386282	5	1589
Sikem	PacBio HiFi + Hi-C	Chr1	Small	211330223	211331808	2	1585
Sikem	PacBio HiFi + Hi-C	Chr5	Small	93775170	93776750	11	1580
Sikem	PacBio HiFi + Hi-C	Chr7	Small	286667417	286668997	2	1580
Sikem	PacBio HiFi + Hi-C	Chr1	Small	78712152	78713718	9	1566
Sikem	PacBio HiFi + Hi-C	Chr2	Small	79975758	79977324	12	1566
Sikem	PacBio HiFi + Hi-C	Chr2	Small	41077813	41079371	7	1558
Sikem	PacBio HiFi + Hi-C	Chr3	Small	167933391	167934949	3	1558
Sikem	PacBio HiFi + Hi-C	Chr3	Small	56082600	56084156	11	1556
Sikem	PacBio HiFi + Hi-C	Chr6	Small	79691623	79693159	3	1536
Sikem	PacBio HiFi + Hi-C	Chr5	Small	44275063	44276597	2	1534
Sikem	PacBio HiFi + Hi-C	Chr2	Small	285140297	285141825	17	1528
Sikem	PacBio HiFi + Hi-C	Chr6	Small	103311143	103312661	3	1518
Sikem	PacBio HiFi + Hi-C	Chr2	Small	150037769	150039284	10	1515
Sikem	PacBio HiFi + Hi-C	Chr6	Small	128267202	128268701	6	1499
Sikem	PacBio HiFi + Hi-C	Chr7	Small	50221402	50222898	3	1496
Sikem	PacBio HiFi + Hi-C	Chr5	Small	97995829	97997319	3	1490
Sikem	PacBio HiFi + Hi-C	Chr5	Small	102915898	102917383	2	1485
Sikem	PacBio HiFi + Hi-C	Chr7	Small	192273857	192275333	17	1476
Sikem	PacBio HiFi + Hi-C	Chr2	Small	199496375	199497849	9	1474
Sikem	PacBio HiFi + Hi-C	Chr6	Small	27075773	27077247	2	1474
Sikem	PacBio HiFi + Hi-C	Chr5	Small	89708863	89710331	3	1468
Sikem	PacBio HiFi + Hi-C	Chr1	Small	26602845	26604300	12	1455
Sikem	PacBio HiFi + Hi-C	Chr4	Small	69746467	69747917	10	1450
Sikem	PacBio HiFi + Hi-C	Chr3	Small	78325268	78326711	3	1443
Sikem	PacBio HiFi + Hi-C	Chr2	Small	87431718	87433156	28	1438
Sikem	PacBio HiFi + Hi-C	Chr3	Small	103528788	103530217	3	1429
Sikem	PacBio HiFi + Hi-C	Chr5	Small	123973313	123974742	5	1429
Sikem	PacBio HiFi + Hi-C	Chr7	Small	359843564	359844974	3	1410
Sikem	PacBio HiFi + Hi-C	Chr4	Small	406504055	406505464	9	1409
Sikem	PacBio HiFi + Hi-C	Chr1	Small	42685720	42687120	3	1400
Sikem	PacBio HiFi + Hi-C	Chr1	Small	103254394	103255787	24	1393
Sikem	PacBio HiFi + Hi-C	Chr6	Small	37010988	37012372	2	1384
Sikem	PacBio HiFi + Hi-C	Chr7	Small	72436677	72438052	22	1375
Sikem	PacBio HiFi + Hi-C	Chr7	Small	125505385	125506755	5	1370
Sikem	PacBio HiFi + Hi-C	Chr4	Small	84996690	84998051	3	1361
Sikem	PacBio HiFi + Hi-C	Chr7	Small	217574137	217575496	9	1359
Sikem	PacBio HiFi + Hi-C	Chr5	Small	149938822	149940178	14	1356
Sikem	PacBio HiFi + Hi-C	Chr4	Small	138610791	138612143	2	1352
Sikem	PacBio HiFi + Hi-C	Chr6	Small	33981159	33982500	4	1341
Sikem	PacBio HiFi + Hi-C	Chr1	Small	7458070	7459410	6	1340
Sikem	PacBio HiFi + Hi-C	Chr3	Small	263521269	263522607	15	1338
Sikem	PacBio HiFi + Hi-C	Chr7	Small	107659422	107660757	15	1335
Sikem	PacBio HiFi + Hi-C	Chr3	Small	378968089	378969420	2	1331
Sikem	PacBio HiFi + Hi-C	Chr3	Small	262458460	262459780	13	1320
Sikem	PacBio HiFi + Hi-C	Chr1	Small	127455675	127456993	3	1318
Sikem	PacBio HiFi + Hi-C	Chr4	Small	126218848	126220157	7	1309
Sikem	PacBio HiFi + Hi-C	Chr5	Small	131134154	131135449	18	1295
Sikem	PacBio HiFi + Hi-C	Chr6	Small	69572016	69573299	5	1283
Sikem	PacBio HiFi + Hi-C	Chr6	Small	108786101	108787380	3	1279
Sikem	PacBio HiFi + Hi-C	Chr6	Small	70963031	70964308	6	1277
Sikem	PacBio HiFi + Hi-C	Chr7	Small	82848474	82849745	2	1271
Sikem	PacBio HiFi + Hi-C	Chr3	Small	83482138	83483408	10	1270
Sikem	PacBio HiFi + Hi-C	Chr4	Small	195457996	195459264	2	1268
Sikem	PacBio HiFi + Hi-C	Chr3	Small	251362083	251363349	23	1266
Sikem	PacBio HiFi + Hi-C	Chr7	Small	212518948	212520202	5	1254
Sikem	PacBio HiFi + Hi-C	Chr3	Small	57216838	57218091	9	1253
Sikem	PacBio HiFi + Hi-C	Chr7	Small	85295112	85296353	8	1241
Sikem	PacBio HiFi + Hi-C	Chr5	Small	84313024	84314259	4	1235
Sikem	PacBio HiFi + Hi-C	Chr4	Small	224594960	224596191	4	1231
Sikem	PacBio HiFi + Hi-C	Chr6	Small	13526711	13527936	4	1225
Sikem	PacBio HiFi + Hi-C	Chr3	Small	150845005	150846220	2	1215
Sikem	PacBio HiFi + Hi-C	Chr4	Small	156046291	156047468	7	1177
Sikem	PacBio HiFi + Hi-C	Chr7	Small	275927722	275928898	12	1176
Sikem	PacBio HiFi + Hi-C	Chr2	Small	141086634	141087805	10	1171
Sikem	PacBio HiFi + Hi-C	Chr2	Small	225491724	225492895	6	1171
Sikem	PacBio HiFi + Hi-C	Chr6	Small	135492739	135493906	3	1167
Sikem	PacBio HiFi + Hi-C	Chr1	Small	171187285	171188450	3	1165
Sikem	PacBio HiFi + Hi-C	Chr7	Small	151997698	151998856	3	1158
Sikem	PacBio HiFi + Hi-C	Chr3	Small	317558562	317559701	2	1139
Sikem	PacBio HiFi + Hi-C	Chr4	Small	170263653	170264791	2	1138
Sikem	PacBio HiFi + Hi-C	Chr6	Small	136400223	136401353	6	1130
Sikem	PacBio HiFi + Hi-C	Chr4	Small	294539729	294540842	4	1113
Sikem	PacBio HiFi + Hi-C	Chr7	Small	129409424	129410535	7	1111
Sikem	PacBio HiFi + Hi-C	Chr1	Small	217836337	217837442	11	1105
Sikem	PacBio HiFi + Hi-C	Chr3	Small	374511968	374513067	9	1099
Sikem	PacBio HiFi + Hi-C	Chr2	Small	31210721	31211813	2	1092
Sikem	PacBio HiFi + Hi-C	Chr1	Small	226624542	226625629	6	1087
Sikem	PacBio HiFi + Hi-C	Chr1	Small	110171979	110173059	2	1080
Sikem	PacBio HiFi + Hi-C	Chr4	Small	423234865	423235939	3	1074
Sikem	PacBio HiFi + Hi-C	Chr2	Small	114276224	114277296	2	1072
Sikem	PacBio HiFi + Hi-C	Chr2	Small	232945920	232946991	2	1071
Sikem	PacBio HiFi + Hi-C	Chr2	Small	300216213	300217284	7	1071
Sikem	PacBio HiFi + Hi-C	Chr7	Small	2805494	2806564	14	1070
Sikem	PacBio HiFi + Hi-C	Chr2	Small	282399838	282400905	4	1067
Sikem	PacBio HiFi + Hi-C	Chr3	Small	41518665	41519732	6	1067
Sikem	PacBio HiFi + Hi-C	Chr2	Small	76312338	76313395	4	1057
Sikem	PacBio HiFi + Hi-C	Chr4	Small	167988643	167989698	3	1055
Sikem	PacBio HiFi + Hi-C	Chr3	Small	19102397	19103451	7	1054
Sikem	PacBio HiFi + Hi-C	Chr7	Small	290429295	290430348	3	1053
Sikem	PacBio HiFi + Hi-C	Chr3	Small	1162782	1163827	3	1045
Sikem	PacBio HiFi + Hi-C	Chr5	Small	5582685	5583729	2	1044
Sikem	PacBio HiFi + Hi-C	Chr3	Small	227054294	227055335	5	1041
Sikem	PacBio HiFi + Hi-C	Chr6	Small	72965702	72966741	4	1039
Sikem	PacBio HiFi + Hi-C	Chr4	Small	363164965	363166003	16	1038
Sikem	PacBio HiFi + Hi-C	Chr5	Small	349429	350463	7	1034
Sikem	PacBio HiFi + Hi-C	Chr6	Small	166296982	166298010	13	1028
Sikem	PacBio HiFi + Hi-C	Chr1	Small	218415849	218416874	13	1025
Sikem	PacBio HiFi + Hi-C	Chr4	Small	390697589	390698609	13	1020
Sikem	PacBio HiFi + Hi-C	Chr6	Small	88474921	88475941	9	1020
Sikem	PacBio HiFi + Hi-C	Chr3	Small	10985609	10986620	9	1011
Sikem	PacBio HiFi + Hi-C	Chr6	Small	215082930	215083941	2	1011
Sikem	PacBio HiFi + Hi-C	Chr3	Small	382767872	382768866	5	994
Sikem	PacBio HiFi + Hi-C	Chr4	Small	125693669	125694659	13	990
Sikem	PacBio HiFi + Hi-C	Chr6	Small	120768372	120769360	2	988
Sikem	PacBio HiFi + Hi-C	Chr5	Small	184762550	184763531	4	981
Sikem	PacBio HiFi + Hi-C	Chr6	Small	250642236	250643213	4	977
Sikem	PacBio HiFi + Hi-C	Chr3	Small	355049936	355050907	25	971
Sikem	PacBio HiFi + Hi-C	Chr1	Small	224385142	224386112	6	970
Sikem	PacBio HiFi + Hi-C	Chr3	Small	1311448	1312417	2	969
Sikem	PacBio HiFi + Hi-C	Chr3	Small	42018379	42019348	4	969
Sikem	PacBio HiFi + Hi-C	Chr7	Small	350415915	350416883	21	968
Sikem	PacBio HiFi + Hi-C	Chr3	Small	226883952	226884918	5	966
Sikem	PacBio HiFi + Hi-C	Chr4	Small	280702261	280703227	5	966
Sikem	PacBio HiFi + Hi-C	Chr5	Small	98604156	98605121	2	965
Sikem	PacBio HiFi + Hi-C	Chr1	Small	259889274	259890226	12	952
Sikem	PacBio HiFi + Hi-C	Chr6	Small	20745176	20746121	31	945
Sikem	PacBio HiFi + Hi-C	Chr5	Small	26202060	26203002	8	942
Sikem	PacBio HiFi + Hi-C	Chr5	Small	211225246	211226176	4	930
Sikem	PacBio HiFi + Hi-C	Chr2	Small	199858548	199859474	2	926
Sikem	PacBio HiFi + Hi-C	Chr7	Small	264136466	264137387	9	921
Sikem	PacBio HiFi + Hi-C	Chr3	Small	41649049	41649965	6	916
Sikem	PacBio HiFi + Hi-C	Chr2	Small	222936624	222937529	4	905
Sikem	PacBio HiFi + Hi-C	Chr1	Small	178807896	178808794	8	898
Sikem	PacBio HiFi + Hi-C	Chr6	Small	32534587	32535481	8	894
Sikem	PacBio HiFi + Hi-C	Chr1	Small	256362297	256363187	7	890
Sikem	PacBio HiFi + Hi-C	Chr4	Small	337865826	337866711	3	885
Sikem	PacBio HiFi + Hi-C	Chr5	Small	65596881	65597763	4	882
Sikem	PacBio HiFi + Hi-C	Chr7	Small	232969508	232970381	2	873
Sikem	PacBio HiFi + Hi-C	Chr3	Small	362779817	362780684	4	867
Sikem	PacBio HiFi + Hi-C	Chr4	Small	91557763	91558618	12	855
Sikem	PacBio HiFi + Hi-C	Chr2	Small	144942436	144943285	11	849
Sikem	PacBio HiFi + Hi-C	Chr2	Small	86539958	86540801	5	843
Sikem	PacBio HiFi + Hi-C	Chr1	Small	5799283	5800125	7	842
Sikem	PacBio HiFi + Hi-C	Chr1	Small	256498791	256499633	7	842
Sikem	PacBio HiFi + Hi-C	Chr1	Small	183448525	183449362	3	837
Sikem	PacBio HiFi + Hi-C	Chr6	Small	120602349	120603186	5	837
Sikem	PacBio HiFi + Hi-C	Chr3	Small	374980629	374981463	4	834
Sikem	PacBio HiFi + Hi-C	Chr3	Small	13789613	13790439	5	826
Sikem	PacBio HiFi + Hi-C	Chr2	Small	145005307	145006132	3	825
Sikem	PacBio HiFi + Hi-C	Chr7	Small	77125206	77126031	8	825
Sikem	PacBio HiFi + Hi-C	Chr7	Small	194595126	194595951	2	825
Sikem	PacBio HiFi + Hi-C	Chr4	Small	187312957	187313776	5	819
Sikem	PacBio HiFi + Hi-C	Chr3	Small	66513003	66513815	6	812
Sikem	PacBio HiFi + Hi-C	Chr6	Small	65883389	65884197	7	808
Sikem	PacBio HiFi + Hi-C	Chr4	Small	407347817	407348624	6	807
Sikem	PacBio HiFi + Hi-C	Chr3	Small	12868874	12869676	3	802
Sikem	PacBio HiFi + Hi-C	Chr2	Small	57262195	57262991	7	796
Sikem	PacBio HiFi + Hi-C	Chr3	Small	213790432	213791225	4	793
Sikem	PacBio HiFi + Hi-C	Chr3	Small	119514565	119515354	21	789
Sikem	PacBio HiFi + Hi-C	Chr1	Small	237237681	237238469	12	788
Sikem	PacBio HiFi + Hi-C	Chr4	Small	285403793	285404581	4	788
Sikem	PacBio HiFi + Hi-C	Chr7	Small	72154696	72155478	4	782
Sikem	PacBio HiFi + Hi-C	Chr3	Small	140879866	140880646	9	780
Sikem	PacBio HiFi + Hi-C	Chr3	Small	255213129	255213907	2	778
Sikem	PacBio HiFi + Hi-C	Chr3	Small	236251656	236252430	2	774
Sikem	PacBio HiFi + Hi-C	Chr7	Small	57501929	57502703	5	774
Sikem	PacBio HiFi + Hi-C	Chr3	Small	258457683	258458455	4	772
Sikem	PacBio HiFi + Hi-C	Chr3	Small	41187505	41188273	2	768
Sikem	PacBio HiFi + Hi-C	Chr1	Small	141451518	141452274	3	756
Sikem	PacBio HiFi + Hi-C	Chr3	Small	273200951	273201702	25	751
Sikem	PacBio HiFi + Hi-C	Chr3	Small	292143250	292144001	3	751
Sikem	PacBio HiFi + Hi-C	Chr7	Small	59418905	59419652	7	747
Sikem	PacBio HiFi + Hi-C	Chr2	Small	65267347	65268089	4	742
Sikem	PacBio HiFi + Hi-C	Chr3	Small	384538979	384539721	4	742
Sikem	PacBio HiFi + Hi-C	Chr1	Small	38860253	38860994	4	741
Sikem	PacBio HiFi + Hi-C	Chr3	Small	119419625	119420365	3	740
Sikem	PacBio HiFi + Hi-C	Chr4	Small	17108467	17109203	2	736
Sikem	PacBio HiFi + Hi-C	Chr5	Small	111142332	111143066	3	734
Sikem	PacBio HiFi + Hi-C	Chr5	Small	189418469	189419202	5	733
Sikem	PacBio HiFi + Hi-C	Chr5	Small	59677117	59677847	4	730
Sikem	PacBio HiFi + Hi-C	Chr2	Small	194532485	194533213	6	728
Sikem	PacBio HiFi + Hi-C	Chr6	Small	77723013	77723739	4	726
Sikem	PacBio HiFi + Hi-C	Chr4	Small	21855037	21855761	2	724
Sikem	PacBio HiFi + Hi-C	Chr4	Small	302466365	302467089	5	724
Sikem	PacBio HiFi + Hi-C	Chr1	Small	220345183	220345904	6	721
Sikem	PacBio HiFi + Hi-C	Chr1	Small	137458243	137458961	2	718
Sikem	PacBio HiFi + Hi-C	Chr3	Small	6288714	6289432	5	718
Sikem	PacBio HiFi + Hi-C	Chr3	Small	253894414	253895132	7	718
Sikem	PacBio HiFi + Hi-C	Chr7	Small	364986671	364987388	6	717
Sikem	PacBio HiFi + Hi-C	Chr1	Small	178240865	178241578	5	713
Sikem	PacBio HiFi + Hi-C	Chr4	Small	338488108	338488821	3	713
Sikem	PacBio HiFi + Hi-C	Chr1	Small	44935584	44936293	2	709
Sikem	PacBio HiFi + Hi-C	Chr3	Small	141592201	141592909	7	708
Sikem	PacBio HiFi + Hi-C	Chr3	Small	355933755	355934461	5	706
Sikem	PacBio HiFi + Hi-C	Chr1	Small	201230164	201230866	3	702
Sikem	PacBio HiFi + Hi-C	Chr5	Small	91714305	91715007	4	702
Sikem	PacBio HiFi + Hi-C	Chr6	Small	225859017	225859717	7	700
Sikem	PacBio HiFi + Hi-C	Chr7	Small	260413034	260413731	3	697
Sikem	PacBio HiFi + Hi-C	Chr7	Small	20694623	20695315	8	692
Sikem	PacBio HiFi + Hi-C	Chr1	Small	48422391	48423079	2	688
Sikem	PacBio HiFi + Hi-C	Chr3	Small	141214299	141214986	7	687
Sikem	PacBio HiFi + Hi-C	Chr7	Small	359870544	359871231	2	687
Sikem	PacBio HiFi + Hi-C	Chr7	Small	81368051	81368737	6	686
Sikem	PacBio HiFi + Hi-C	Chr5	Small	232705325	232706008	5	683
Sikem	PacBio HiFi + Hi-C	Chr5	Small	419023	419704	4	681
Sikem	PacBio HiFi + Hi-C	Chr6	Small	150783756	150784436	2	680
Sikem	PacBio HiFi + Hi-C	Chr5	Small	164616623	164617301	8	678
Sikem	PacBio HiFi + Hi-C	Chr3	Small	38370705	38371376	3	671
Sikem	PacBio HiFi + Hi-C	Chr2	Small	64524247	64524917	4	670
Sikem	PacBio HiFi + Hi-C	Chr7	Small	266082585	266083251	2	666
Sikem	PacBio HiFi + Hi-C	Chr2	Small	140821696	140822352	3	656
Sikem	PacBio HiFi + Hi-C	Chr4	Small	68951169	68951825	4	656
Sikem	PacBio HiFi + Hi-C	Chr5	Small	93563395	93564051	6	656
Sikem	PacBio HiFi + Hi-C	Chr7	Small	262678947	262679593	2	646
Sikem	PacBio HiFi + Hi-C	Chr7	Small	303052099	303052739	3	640
Sikem	PacBio HiFi + Hi-C	Chr6	Small	114475913	114476548	4	635
Sikem	PacBio HiFi + Hi-C	Chr5	Small	34960687	34961321	4	634
Sikem	PacBio HiFi + Hi-C	Chr5	Small	250922778	250923411	16	633
Sikem	PacBio HiFi + Hi-C	Chr2	Small	231452199	231452831	2	632
Sikem	PacBio HiFi + Hi-C	Chr3	Small	180746206	180746831	5	625
Sikem	PacBio HiFi + Hi-C	Chr3	Small	43110699	43111322	7	623
Sikem	PacBio HiFi + Hi-C	Chr5	Small	117539355	117539978	5	623
Sikem	PacBio HiFi + Hi-C	Chr1	Small	58526138	58526756	4	618
Sikem	PacBio HiFi + Hi-C	Chr7	Small	211969428	211970044	5	616
Sikem	PacBio HiFi + Hi-C	Chr3	Small	340007547	340008157	3	610
Sikem	PacBio HiFi + Hi-C	Chr5	Small	85823683	85824293	2	610
Sikem	PacBio HiFi + Hi-C	Chr2	Small	43820721	43821328	3	607
Sikem	PacBio HiFi + Hi-C	Chr6	Small	244342910	244343515	10	605
Sikem	PacBio HiFi + Hi-C	Chr5	Small	117657278	117657881	3	603
Sikem	PacBio HiFi + Hi-C	Chr4	Small	415157760	415158355	2	595
Sikem	PacBio HiFi + Hi-C	Chr3	Small	7513187	7513779	2	592
Sikem	PacBio HiFi + Hi-C	Chr6	Small	67191429	67192018	2	589
Sikem	PacBio HiFi + Hi-C	Chr7	Small	214671792	214672379	3	587
Sikem	PacBio HiFi + Hi-C	Chr7	Small	68676121	68676707	7	586
Sikem	PacBio HiFi + Hi-C	Chr2	Small	4011723	4012307	4	584
Sikem	PacBio HiFi + Hi-C	Chr3	Small	312771994	312772573	2	579
Sikem	PacBio HiFi + Hi-C	Chr6	Small	86522463	86523040	2	577
Sikem	PacBio HiFi + Hi-C	Chr7	Small	52669305	52669882	3	577
Sikem	PacBio HiFi + Hi-C	Chr4	Small	132388447	132389020	3	573
Sikem	PacBio HiFi + Hi-C	Chr6	Small	127997634	127998204	3	570
Sikem	PacBio HiFi + Hi-C	Chr3	Small	41611262	41611830	2	568
Sikem	PacBio HiFi + Hi-C	Chr5	Small	160407854	160408421	7	567
Sikem	PacBio HiFi + Hi-C	Chr7	Small	126557925	126558489	2	564
Sikem	PacBio HiFi + Hi-C	Chr2	Small	36733456	36734018	6	562
Sikem	PacBio HiFi + Hi-C	Chr3	Small	75663036	75663597	9	561
Sikem	PacBio HiFi + Hi-C	Chr4	Small	170448768	170449328	2	560
Sikem	PacBio HiFi + Hi-C	Chr3	Small	25736960	25737517	2	557
Sikem	PacBio HiFi + Hi-C	Chr4	Small	293467536	293468091	8	555
Sikem	PacBio HiFi + Hi-C	Chr7	Small	209701888	209702440	2	552
Sikem	PacBio HiFi + Hi-C	Chr1	Small	10817245	10817796	3	551
Sikem	PacBio HiFi + Hi-C	Chr1	Small	115179318	115179868	4	550
Sikem	PacBio HiFi + Hi-C	Chr3	Small	55967582	55968129	5	547
Sikem	PacBio HiFi + Hi-C	Chr7	Small	361114541	361115086	5	545
Sikem	PacBio HiFi + Hi-C	Chr3	Small	309671254	309671793	2	539
Sikem	PacBio HiFi + Hi-C	Chr5	Small	137215058	137215597	4	539
Sikem	PacBio HiFi + Hi-C	Chr2	Small	60016042	60016580	6	538
Sikem	PacBio HiFi + Hi-C	Chr3	Small	200491766	200492302	4	536
Sikem	PacBio HiFi + Hi-C	Chr4	Small	333561737	333562272	13	535
Sikem	PacBio HiFi + Hi-C	Chr7	Small	350228626	350229161	8	535
Sikem	PacBio HiFi + Hi-C	Chr7	Small	105815905	105816438	2	533
Sikem	PacBio HiFi + Hi-C	Chr4	Small	31263818	31264348	5	530
Sikem	PacBio HiFi + Hi-C	Chr4	Small	26256503	26257032	2	529
Sikem	PacBio HiFi + Hi-C	Chr3	Small	279698050	279698577	3	527
Sikem	PacBio HiFi + Hi-C	Chr3	Small	213365799	213366324	3	525
Sikem	PacBio HiFi + Hi-C	Chr4	Small	84001142	84001665	7	523
Sikem	PacBio HiFi + Hi-C	Chr7	Small	904496	905019	2	523
Sikem	PacBio HiFi + Hi-C	Chr7	Small	219445215	219445735	7	520
Sikem	PacBio HiFi + Hi-C	Chr3	Small	140728736	140729255	3	519
Sikem	PacBio HiFi + Hi-C	Chr6	Small	82281647	82282165	11	518
Sikem	PacBio HiFi + Hi-C	Chr1	Small	78617879	78618396	3	517
Sikem	PacBio HiFi + Hi-C	Chr7	Small	346370972	346371488	3	516
Sikem	PacBio HiFi + Hi-C	Chr5	Small	24116860	24117375	4	515
Sikem	PacBio HiFi + Hi-C	Chr6	Small	143128381	143128895	2	514
Sikem	PacBio HiFi + Hi-C	Chr3	Small	137382649	137383159	4	510
Sikem	PacBio HiFi + Hi-C	Chr5	Small	206847874	206848383	9	509
Sikem	PacBio HiFi + Hi-C	Chr1	Small	218354757	218355265	5	508
Sikem	PacBio HiFi + Hi-C	Chr5	Small	96497316	96497823	2	507
Sikem	PacBio HiFi + Hi-C	Chr2	Small	100333264	100333769	3	505
Sikem	PacBio HiFi + Hi-C	Chr2	Small	89362700	89363204	2	504
Sikem	PacBio HiFi + Hi-C	Chr5	Small	82354696	82355200	3	504
Sikem	PacBio HiFi + Hi-C	Chr4	Small	278657109	278657612	2	503
Sikem	PacBio HiFi + Hi-C	Chr5	Small	3784847	3785349	3	502
Sikem	PacBio HiFi + Hi-C	Chr7	Small	198759277	198759779	2	502
Sikem	PacBio HiFi + Hi-C	Chr3	Small	108915538	108916037	3	499
Sikem	PacBio HiFi + Hi-C	Chr6	Small	171519333	171519832	4	499
Sikem	PacBio HiFi + Hi-C	Chr5	Small	135164364	135164861	3	497
Sikem	PacBio HiFi + Hi-C	Chr6	Small	170613724	170614221	2	497
Sikem	PacBio HiFi + Hi-C	Chr1	Small	79637311	79637807	3	496
Sikem	PacBio HiFi + Hi-C	Chr3	Small	43982952	43983448	6	496
Sikem	PacBio HiFi + Hi-C	Chr5	Small	113425356	113425852	5	496
Sikem	PacBio HiFi + Hi-C	Chr7	Small	349995791	349996287	8	496
Sikem	PacBio HiFi + Hi-C	Chr3	Small	88263413	88263906	3	493
Sikem	PacBio HiFi + Hi-C	Chr4	Small	53682996	53683489	2	493
Sikem	PacBio HiFi + Hi-C	Chr4	Small	313803208	313803701	2	493
Sikem	PacBio HiFi + Hi-C	Chr7	Small	123156499	123156992	3	493
Sikem	PacBio HiFi + Hi-C	Chr6	Small	146430752	146431240	3	488
Sikem	PacBio HiFi + Hi-C	Chr6	Small	244758860	244759348	2	488
Sikem	PacBio HiFi + Hi-C	Chr3	Small	241034430	241034917	2	487
Sikem	PacBio HiFi + Hi-C	Chr3	Small	338063641	338064127	12	486
Sikem	PacBio HiFi + Hi-C	Chr4	Small	367294761	367295247	5	486
Sikem	PacBio HiFi + Hi-C	Chr3	Small	137509096	137509579	11	483
Sikem	PacBio HiFi + Hi-C	Chr5	Small	64175871	64176349	8	478
Sikem	PacBio HiFi + Hi-C	Chr5	Small	96811640	96812118	2	478
Sikem	PacBio HiFi + Hi-C	Chr7	Small	210313604	210314082	8	478
Sikem	PacBio HiFi + Hi-C	Chr7	Small	94796013	94796484	2	471
Sikem	PacBio HiFi + Hi-C	Chr6	Small	65240906	65241375	5	469
Sikem	PacBio HiFi + Hi-C	Chr5	Small	151830408	151830876	2	468
Sikem	PacBio HiFi + Hi-C	Chr7	Small	358450770	358451238	9	468
Sikem	PacBio HiFi + Hi-C	Chr3	Small	331302959	331303426	3	467
Sikem	PacBio HiFi + Hi-C	Chr4	Small	387578636	387579103	5	467
Sikem	PacBio HiFi + Hi-C	Chr7	Small	192360183	192360650	4	467
[truncated: 626 more rows]

## Sheet: Supplementary Table 6
Assembly statistics of HEN17 chromosome-level haplotype-resolved assembly
	Total length (bp)	Contig N50/N90 (Mb)	Contig L50/L90 (#)	Scaffold N50/N90 (Mb)	Scaffold L50/L90 (#)
Haplome 1	436702900	6.72/0.10	19/180	66.23/0.10	4/112
Haplome 2	427192558	8.12/0.59	16/90	67.45/4.43	4/7

## Sheet: Supplementary Table 7
Proportion of nonrepetitive and repetitive sequences
Genome	Haplome	Sequence type	Fraction per 1Mb (%)
DH647	H1	Nonrepetitive	20.5
DH647	H2	Nonrepetitive	20.5
DH647	H1	Repetitive	79.47
DH647	H2	Repetitive	79.47
Sikem	H1	Nonrepetitive	21.42
Sikem	H2	Nonrepetitive	21.66
Sikem	H1	Repetitive	78.56
Sikem	H2	Repetitive	78.32
HEN17	H1	Nonrepetitive	53.82
HEN17	H2	Nonrepetitive	52.92
HEN17	H1	Repetitive	46.18
HEN17	H2	Repetitive	47.08

## Sheet: Supplementary Table 8
Statistics of nonrepetitive and repetitive sequences (length >= 2 kb, mapping QV > 0)
Genome	Sequence type	Number of sequences (#)	Total sequence length (bp)
DH647	Nonrepetitive	26395	90753406
DH647	Repetitive	67759	254814063
DH647	Nonrepetitive not aligned	5713	19292265
DH647	Repetitive not aligned	0	0
Sikem	Nonrepetitive	41096	142321428
Sikem	Repetitive	169823	902845780
Sikem	Nonrepetitive not aligned	9328	32568465
Sikem	Repetitive not aligned	137	520826
HEN17	Nonrepetitive	17154	55865165
HEN17	Repetitive	7248	51618794
HEN17	Nonrepetitive not aligned	271	831403
HEN17	Repetitive not aligned	11	33968

## Sheet: Supplementary Table 9
Type of variation in the alignment of nonrepetitive sequences
Genome	Chromosome (Chr)	SNV (#)	INDEL (#)	PAV (#)	SC (#)	SC >= 50 bp (#)
DH647	Chr1	70424	19926	257	1308	806
DH647	Chr2	256701	51824	1124	4133	2663
DH647	Chr3	254594	49805	1094	4044	2632
DH647	Chr4	168937	40429	688	2772	1738
DH647	Chr5	206856	39004	909	3267	2132
DH647	Chr6	171553	34665	782	2924	1833
DH647	Chr7	216088	44017	968	3579	2333
Sikem	Chr1	261327	45841	1154	4004	2655
Sikem	Chr2	359447	63089	1525	5245	3514
Sikem	Chr3	360945	63276	1497	5432	3721
Sikem	Chr4	418932	74964	1680	6383	4228
Sikem	Chr5	209862	36229	943	3147	2157
Sikem	Chr6	250058	44376	1067	3766	2527
Sikem	Chr7	312695	53647	1341	4794	3193
HEN17	Chr1	77038	18989	741	1755	804
HEN17	Chr2	75328	19094	748	1879	823
HEN17	Chr3	69091	17117	635	1612	748
HEN17	Chr4	63626	16177	595	1582	761
HEN17	Chr5	37830	8828	339	960	476
HEN17	Chr6	53266	13215	503	1292	575
HEN17	Chr7	60810	15471	593	1510	690
